# Supplementary material for: Lipocalin 2 modulates dendritic cell activity and shapes immunity to influenza in a microbiome dependent manner
Source: PLoS Pathog. 2021 Apr 27;17(4):e1009487. doi: 10.1371/journal.ppat.1009487 (PMC8078786; doi:10.1371/journal.ppat.1009487)
Supplement: S3 Table — Overview of all detected amplicon sequencing variants (ASVs), and their p values for comparisons of ASV abundance between WT and Lcn2-/- samples. BAL: Bronchoalveolar lavage; NA: not applicable. (XLSX) [file ppat.1009487.s008.xlsx]

## Sheet: Sheet1
ASV	Kingdom	Phylum	Class	Order	Family	Genus	Species	p-value (BAL)	adjusted p-value (BAL)	p-value (ileum_mucosa)	adjusted p-value (ileum_mucosa)	p-value (ileum_lumen)	adjusted p-value (ileum_lumen)	p-value (Cecum_lumen)	adjusted p-value (Cecum_lumen)	p-value (stool)	adjusted p-value (stool)
ASV_1	Bacteria	Bacteroidetes	Bacteroidia	Bacteroidales	Muribaculaceae	NA	NA			0.127169	0.47363	0.991395	0.993101	0.0285084	0.333743	0.235701	0.585985
ASV_2	Bacteria	Bacteroidetes	Bacteroidia	Bacteroidales	Muribaculaceae	NA	NA	0.518697	0.652338	0.0838122	0.459184	0.475213	0.773839	0.246828	0.62943	0.456081	0.769103
ASV_3	Bacteria	Firmicutes	Clostridia	Clostridiales	Clostridiaceae_1	Candidatus_Arthromitus	NA			2.62677e-08	1.24246e-05	0.00319982	0.465574	0.00340272	0.173897	1.82144e-05	0.00694878
ASV_4	Bacteria	Firmicutes	Bacilli	Lactobacillales	Lactobacillaceae	Lactobacillus	NA	0.658518	0.765126	0.701891	0.914856	0.239666	0.773839	0.160115	0.550439	0.467782	0.775616
ASV_5	Bacteria	Proteobacteria	Alphaproteobacteria	Rhizobiales	Xanthobacteraceae	Bradyrhizobium	NA	0.460623	0.632834			0.765036	0.848097	0.122507	0.504329
ASV_6	Bacteria	Bacteroidetes	Bacteroidia	Bacteroidales	Muribaculaceae	NA	NA	0.313449	0.632834	0.331966	0.694779	0.164261	0.773839	0.661914	0.879479	0.0235242	0.453382
ASV_7	Bacteria	Bacteroidetes	Bacteroidia	Bacteroidales	Muribaculaceae	NA	NA	0.250105	0.632834	0.294149	0.659396	0.261826	0.773839	0.379785	0.729469	0.095828	0.534961
ASV_8	Bacteria	Bacteroidetes	Bacteroidia	Bacteroidales	Muribaculaceae	NA	NA	0.984272	0.990702	0.297155	0.662992	0.194347	0.773839	0.536181	0.808555	0.449792	0.767515
ASV_9	Bacteria	Firmicutes	Bacilli	Lactobacillales	Lactobacillaceae	Lactobacillus	NA	0.516821	0.652212	0.0228493	0.459184	0.0441948	0.773839	0.0129038	0.261034	0.14575	0.534961
ASV_10	Bacteria	Firmicutes	Erysipelotrichia	Erysipelotrichales	Erysipelotrichaceae	Dubosiella	NA	0.129675	0.632834	0.0609098	0.459184	0.0166277	0.691235	0.0224976	0.333743	0.0092636	0.383534
ASV_11	Bacteria	Proteobacteria	Alphaproteobacteria	Rhizobiales	Xanthobacteraceae	Bradyrhizobium	NA	0.173081	0.632834	0.149947	0.510251	0.484128	0.773839	0.0513973	0.37742
ASV_12	Bacteria	Bacteroidetes	Bacteroidia	Bacteroidales	Muribaculaceae	NA	NA	0.469547	0.632834	0.0591591	0.459184	0.475751	0.773839	0.260281	0.635267	0.474964	0.77845
ASV_13	Bacteria	Bacteroidetes	Bacteroidia	Bacteroidales	Muribaculaceae	NA	NA	0.51059	0.648026	0.98959	0.992902	0.89497	0.936821	0.379121	0.729469	0.202562	0.571172
ASV_14	Bacteria	Firmicutes	Clostridia	Clostridiales	Lachnospiraceae	Lachnospiraceae_NK4A136_group	NA	0.297876	0.632834	0.974056	0.991211	0.339446	0.773839	0.676068	0.885125	0.998539	0.999909
ASV_15	Bacteria	Bacteroidetes	Bacteroidia	Bacteroidales	Muribaculaceae	NA	NA	0.652874	0.761842	0.335506	0.697211	0.0817279	0.773839	0.740233	0.899426	0.984868	0.999274
ASV_16	Bacteria	Bacteroidetes	Bacteroidia	Bacteroidales	Muribaculaceae	NA	NA	0.665564	0.771103	0.280696	0.653857	0.170778	0.773839	0.188322	0.595638	0.595803	0.832151
ASV_17	Bacteria	Bacteroidetes	Bacteroidia	Bacteroidales	Muribaculaceae	NA	NA			0.0167694	0.459184	0.0761041	0.773839	0.0658046	0.399368	0.062313	0.489745
ASV_18	Bacteria	Bacteroidetes	Bacteroidia	Bacteroidales	Muribaculaceae	NA	NA	0.857914	0.916691	0.0296001	0.459184	0.0733696	0.773839	0.0496412	0.37742	0.0582496	0.489745
ASV_19	Bacteria	Bacteroidetes	Bacteroidia	Bacteroidales	Muribaculaceae	NA	NA	0.875088	0.93136	0.000444503	0.0700832	0.0044084	0.513137	0.00232467	0.173635	0.00203557	0.258857
ASV_20	Bacteria	Firmicutes	Bacilli	Lactobacillales	Lactobacillaceae	Lactobacillus	NA	0.622113	0.73863	0.40779	0.774282	0.982061	0.990571	0.756598	0.905392	0.735768	0.905469
ASV_21	Bacteria	Firmicutes	Clostridia	Clostridiales	Lachnospiraceae	Lachnospiraceae_NK4A136_group	NA	0.924269	0.966218	0.395098	0.764939	0.155366	0.773839	0.192772	0.60187	0.0834078	0.517595
ASV_22	Bacteria	Bacteroidetes	Bacteroidia	Bacteroidales	Muribaculaceae	NA	NA	0.48933	0.633163	9.1656e-07	0.000216767	0.00185279	0.359442	1.51815e-05	0.00737063	0.00111824	0.213304
ASV_23	Bacteria	Bacteroidetes	Bacteroidia	Bacteroidales	Muribaculaceae	NA	NA	0.0618935	0.632834	0.728305	0.92854	0.465593	0.773839	0.143504	0.533747	0.0525753	0.489745
ASV_24	Bacteria	Bacteroidetes	Bacteroidia	Bacteroidales	Muribaculaceae	NA	NA	0.303062	0.632834	0.648763	0.91217	0.313361	0.773839	0.690051	0.885125	0.554876	0.806745
ASV_25	Bacteria	Firmicutes	Erysipelotrichia	Erysipelotrichales	Erysipelotrichaceae	Turicibacter	NA	0.433167	0.632834	0.827926	0.965084	0.620204	0.776416	0.589064	0.849898	0.687173	0.878031
ASV_26	Bacteria	Bacteroidetes	Bacteroidia	Chitinophagales	Chitinophagaceae	Vibrionimonas	NA	0.985816	0.990702	0.287811	0.659396	0.38568	0.773839	0.371758	0.729469
ASV_27	Bacteria	Bacteroidetes	Bacteroidia	Bacteroidales	Muribaculaceae	NA	NA	0.705542	0.805151	0.102518	0.459184	0.344917	0.773839	0.05026	0.37742	0.135434	0.534961
ASV_28	Bacteria	Firmicutes	Bacilli	Lactobacillales	Lactobacillaceae	Lactobacillus	NA	0.307589	0.632834	0.310879	0.67763	0.442314	0.773839	0.686327	0.885125	0.456624	0.769103
ASV_29	Bacteria	Bacteroidetes	Bacteroidia	Bacteroidales	Muribaculaceae	NA	NA	0.628927	0.742491	0.561015	0.902585	0.443294	0.773839	0.322851	0.684473	0.583678	0.821672
ASV_30	Bacteria	Actinobacteria	Actinobacteria	Bifidobacteriales	Bifidobacteriaceae	Bifidobacterium	pseudolongum			0.245699	0.624815	0.285176	0.773839	0.314454	0.679038	0.107524	0.534961
ASV_31	Bacteria	Bacteroidetes	Bacteroidia	Bacteroidales	Muribaculaceae	NA	NA	0.294971	0.632834	0.539341	0.893368	0.648094	0.796237	0.58275	0.847082	0.561321	0.807412
ASV_32	Bacteria	Bacteroidetes	Bacteroidia	Bacteroidales	Rikenellaceae	Alistipes	NA	0.448583	0.632834	0.609658	0.91217	0.873526	0.917676	0.270931	0.640083	0.762694	0.918943
ASV_33	Bacteria	Bacteroidetes	Bacteroidia	Bacteroidales	Muribaculaceae	NA	NA	0.793075	0.867994	0.00824933	0.459184	0.0822218	0.773839	0.065805	0.399368	0.0616409	0.489745
ASV_34	Bacteria	Bacteroidetes	Bacteroidia	Bacteroidales	Muribaculaceae	NA	NA	0.941524	0.97769	0.500206	0.869843	0.574825	0.773839	0.795148	0.923956	0.903664	0.967035
ASV_35	Bacteria	Firmicutes	Erysipelotrichia	Erysipelotrichales	Erysipelotrichaceae	Dubosiella	NA	0.253388	0.632834	0.0903066	0.459184	0.0125359	0.60799	0.0222627	0.333743	0.00770599	0.383534
ASV_36	Bacteria	Bacteroidetes	Bacteroidia	Bacteroidales	Muribaculaceae	NA	NA	0.909006	0.956166	0.0709663	0.459184	0.127557	0.773839	0.0661736	0.399368	0.393915	0.73847
ASV_37	Bacteria	Bacteroidetes	Bacteroidia	Bacteroidales	Muribaculaceae	NA	NA	0.222697	0.632834	0.00678217	0.459184	0.0590667	0.773839	0.253219	0.635267	0.596842	0.832151
ASV_38	Bacteria	Firmicutes	Bacilli	Lactobacillales	Lactobacillaceae	Lactobacillus	gasseri
ASV_39	Bacteria	Proteobacteria	Gammaproteobacteria	Betaproteobacteriales	Burkholderiaceae	Parasutterella	NA	0.855426	0.915414	0.0427554	0.459184	0.493182	0.773839	0.0105987	0.239334	0.0476946	0.489745
ASV_40	Bacteria	Bacteroidetes	Bacteroidia	Bacteroidales	Muribaculaceae	NA	NA	0.153145	0.632834	0.393878	0.764939	0.587838	0.773839	0.376477	0.729469	0.315308	0.662754
ASV_41	Bacteria	Firmicutes	Clostridia	Clostridiales	Lachnospiraceae	NA	NA	0.657046	0.765126	0.557711	0.902585	0.702065	0.818841	0.718016	0.897504	0.663467	0.874776
ASV_42	Bacteria	Firmicutes	Bacilli	Lactobacillales	Lactobacillaceae	Lactobacillus	reuteri	0.984475	0.990702	0.721348	0.922156	0.480162	0.773839	0.612054	0.866333	0.934491	0.986192
ASV_43	Bacteria	Bacteroidetes	Bacteroidia	Bacteroidales	Muribaculaceae	NA	NA	0.303705	0.632834	0.192064	0.559555	0.164852	0.773839	0.292887	0.652279	0.312268	0.661834
ASV_44	Bacteria	Bacteroidetes	Bacteroidia	Bacteroidales	Muribaculaceae	NA	NA	0.98193	0.990702	0.938601	0.991211	0.82005	0.887118	0.833147	0.941776	0.954686	0.988894
ASV_45	Bacteria	Bacteroidetes	Bacteroidia	Bacteroidales	Rikenellaceae	Alistipes	NA	0.307589	0.632834	0.956413	0.991211	0.00958539	0.603179	0.138802	0.530512	0.0913707	0.534961
ASV_46	Bacteria	Bacteroidetes	Bacteroidia	Bacteroidales	Muribaculaceae	NA	NA	0.798011	0.869875			0.501464	0.773839	0.422717	0.761995
ASV_47	Bacteria	Bacteroidetes	Bacteroidia	Chitinophagales	Chitinophagaceae	Vibrionimonas	NA	0.536979	0.667447
ASV_48	Bacteria	Bacteroidetes	Bacteroidia	Bacteroidales	Muribaculaceae	NA	NA	0.770182	0.850977	0.149876	0.510251	0.620332	0.776416	0.086755	0.42761	0.119681	0.534961
ASV_49	Bacteria	Bacteroidetes	Bacteroidia	Bacteroidales	Muribaculaceae	NA	NA	0.68393	0.784537	0.85212	0.967779	0.468614	0.773839	0.728218	0.897504	0.47695	0.77845
ASV_50	Bacteria	Proteobacteria	Deltaproteobacteria	Desulfovibrionales	Desulfovibrionaceae	Desulfovibrio	NA	0.626302	0.741504	0.921281	0.991211	0.337651	0.773839	0.464034	0.768755	0.202867	0.571172
ASV_51	Bacteria	Bacteroidetes	Bacteroidia	Bacteroidales	Muribaculaceae	NA	NA	0.795309	0.868426	0.0877309	0.459184	0.183942	0.773839	0.0159732	0.3102	0.544824	0.797795
ASV_52	Bacteria	Firmicutes	Clostridia	Clostridiales	Lachnospiraceae	Roseburia	NA	0.802225	0.871309	0.338344	0.697211	0.00179322	0.359442	0.0268867	0.333743	0.00987423	0.383534
ASV_53	Bacteria	Bacteroidetes	Bacteroidia	Bacteroidales	Bacteroidaceae	Bacteroides	NA	0.935678	0.975138	0.330933	0.694779	0.637897	0.78823	0.0269672	0.333743	0.0482052	0.489745
ASV_54	Bacteria	Bacteroidetes	Bacteroidia	Bacteroidales	Muribaculaceae	NA	NA	0.936661	0.975138	0.806609	0.953815	0.72073	0.824576	0.849329	0.947034	0.511664	0.779247
ASV_55	Bacteria	Bacteroidetes	Bacteroidia	Bacteroidales	Muribaculaceae	NA	NA	0.306431	0.632834	0.0973392	0.459184	0.0817295	0.773839	0.0120422	0.248787	0.0187658	0.438173
ASV_56	Bacteria	Firmicutes	Erysipelotrichia	Erysipelotrichales	Erysipelotrichaceae	Turicibacter	NA	0.187769	0.632834	0.959418	0.991211	0.575646	0.773839	0.495153	0.7947	0.263266	0.609534
ASV_57	Bacteria	Bacteroidetes	Bacteroidia	Bacteroidales	Muribaculaceae	NA	NA	0.768318	0.850076	0.958487	0.991211	0.783007	0.863863	0.290629	0.650584	0.494837	0.779114
ASV_58	Bacteria	Firmicutes	Erysipelotrichia	Erysipelotrichales	Erysipelotrichaceae	Faecalibaculum	rodentium	0.88154	0.936998	0.0862996	0.459184	0.0376284	0.773839	0.0120306	0.248787	0.057912	0.489745
ASV_59	Bacteria	Bacteroidetes	Bacteroidia	Bacteroidales	Marinifilaceae	Odoribacter	NA	0.304673	0.632834			0.0148634	0.665424	0.0555968	0.394048	0.0664796	0.489745
ASV_60	Bacteria	Firmicutes	Erysipelotrichia	Erysipelotrichales	Erysipelotrichaceae	Faecalibaculum	rodentium	0.187015	0.632834	0.238571	0.609968	0.102273	0.773839	0.0297815	0.333743	0.0332131	0.489745
ASV_61	Bacteria	Bacteroidetes	Bacteroidia	Chitinophagales	Chitinophagaceae	Sediminibacterium	salmoneum	0.119094	0.632834	0.278434	0.653857
ASV_62	Bacteria	Bacteroidetes	Bacteroidia	Bacteroidales	Rikenellaceae	Alistipes	NA	0.415073	0.632834	0.00915492	0.459184	0.0286493	0.773839	1.42725e-08	1.38586e-05	1.27338e-05	0.00694878
ASV_63	Bacteria	Proteobacteria	Gammaproteobacteria	Betaproteobacteriales	Burkholderiaceae	Parasutterella	NA	0.592172	0.710431	0.41435	0.774654	0.682178	0.809813	0.21595	0.609556	0.416353	0.760886
ASV_64	Bacteria	Bacteroidetes	Bacteroidia	Bacteroidales	Muribaculaceae	NA	NA	0.381453	0.632834	0.830537	0.965094	0.960698	0.976873	0.951999	0.98044	0.879164	0.955264
ASV_65	Bacteria	Firmicutes	Bacilli	Lactobacillales	Lactobacillaceae	Lactobacillus	NA	0.781875	0.859608	0.868696	0.975229	0.604802	0.773839	0.431765	0.761995	0.238252	0.585985
ASV_66	Bacteria	Firmicutes	Clostridia	Clostridiales	Lachnospiraceae	Lachnospiraceae_NK4A136_group	NA			0.76861	0.939674	0.651765	0.796237	0.0653258	0.399368	0.757317	0.918943
ASV_67	Bacteria	Bacteroidetes	Bacteroidia	Bacteroidales	Muribaculaceae	NA	NA	0.33911	0.632834	0.458891	0.828455	0.223867	0.773839	0.32833	0.688571	0.432319	0.767515
ASV_68	Bacteria	Firmicutes	Clostridia	Clostridiales	Lachnospiraceae	Lachnospiraceae_NK4A136_group	NA	0.663529	0.769846	0.219282	0.576833	0.209727	0.773839	0.232577	0.62943	0.374765	0.723913
ASV_69	Bacteria	Firmicutes	Clostridia	Clostridiales	Lachnospiraceae	Lachnospiraceae_NK4A136_group	NA	0.726856	0.822268	0.906324	0.991211	0.71326	0.824576	0.214825	0.608149	0.167225	0.536282
ASV_70	Bacteria	Firmicutes	Erysipelotrichia	Erysipelotrichales	Erysipelotrichaceae	Turicibacter	NA	0.557505	0.690285	0.600916	0.91217	0.62226	0.777157	0.515948	0.806285
ASV_71	Bacteria	Bacteroidetes	Bacteroidia	Bacteroidales	Rikenellaceae	Rikenella	NA	0.348815	0.632834	0.224067	0.585546	0.0258823	0.773839	0.275496	0.64615	0.196831	0.571035
ASV_72	Bacteria	Bacteroidetes	Bacteroidia	Bacteroidales	Muribaculaceae	NA	NA	0.493463	0.634847	0.777283	0.939674	0.664558	0.801328	0.488729	0.788002	0.603023	0.838081
ASV_73	Bacteria	Bacteroidetes	Bacteroidia	Bacteroidales	Muribaculaceae	NA	NA	0.917228	0.962318	0.65438	0.91217	0.414418	0.773839	0.333521	0.693466	0.289753	0.629863
ASV_74	Bacteria	Proteobacteria	Deltaproteobacteria	Desulfovibrionales	Desulfovibrionaceae	Desulfovibrio	NA	0.961981	0.984769	0.378519	0.74912	0.254165	0.773839	0.543701	0.811521	0.071729	0.489745
ASV_75	Bacteria	Firmicutes	Clostridia	Clostridiales	Lachnospiraceae	Lachnospiraceae_NK4A136_group	NA	0.4052	0.632834	0.73744	0.935145	0.222733	0.773839	0.148365	0.533747	0.874329	0.955264
ASV_76	Bacteria	Proteobacteria	Gammaproteobacteria	Betaproteobacteriales	Burkholderiaceae	Parasutterella	NA	0.898574	0.947651	0.952908	0.991211	0.687732	0.809813	0.550486	0.813662	0.492884	0.779114
ASV_77	Bacteria	Bacteroidetes	Bacteroidia	Bacteroidales	Muribaculaceae	NA	NA	0.700249	0.80099	0.705209	0.914856	0.923462	0.956326	0.0662186	0.399368	0.498181	0.779114
ASV_78	Bacteria	Bacteroidetes	Bacteroidia	Bacteroidales	Muribaculaceae	NA	NA	0.752993	0.836178	0.277953	0.653857	0.174637	0.773839	0.265659	0.640083	0.23269	0.585985
ASV_79	Bacteria	Bacteroidetes	Bacteroidia	Bacteroidales	Muribaculaceae	Muribaculum	NA	0.847039	0.911072	0.050264	0.459184	0.330631	0.773839	0.200191	0.605574	0.000683686	0.173884
ASV_80	Bacteria	Bacteroidetes	Bacteroidia	Bacteroidales	Muribaculaceae	NA	NA	0.629881	0.742491	0.195873	0.559555	0.3767	0.773839	0.113385	0.483976	0.0510842	0.489745
ASV_81	Bacteria	Bacteroidetes	Bacteroidia	Bacteroidales	Muribaculaceae	NA	NA	0.843547	0.908522	0.202941	0.561352	0.927399	0.956747	0.108068	0.482001	0.346381	0.697231
ASV_82	Bacteria	Bacteroidetes	Bacteroidia	Bacteroidales	Rikenellaceae	Alistipes	NA	0.357374	0.632834			0.732514	0.832864	0.00912253	0.239334	0.0233836	0.453382
ASV_83	Bacteria	Firmicutes	Bacilli	Lactobacillales	Lactobacillaceae	Lactobacillus	NA	0.268401	0.632834	0.446227	0.818083	0.43966	0.773839	0.674656	0.885125	0.866012	0.954866
ASV_84	Bacteria	Bacteroidetes	Bacteroidia	Bacteroidales	Muribaculaceae	NA	NA	0.722946	0.820013	0.251877	0.626729	0.0209146	0.716019	0.0615958	0.399368	0.225907	0.585985
ASV_85	Bacteria	Bacteroidetes	Bacteroidia	Bacteroidales	Muribaculaceae	NA	NA	0.650118	0.760747	0.509617	0.882963	0.862006	0.915691	0.45829	0.76721	0.325157	0.673462
ASV_86	Bacteria	Bacteroidetes	Bacteroidia	Bacteroidales	Muribaculaceae	NA	NA	0.622963	0.73863	0.712859	0.917679	0.467674	0.773839	0.405783	0.75078	0.0713376	0.489745
ASV_87	Bacteria	Firmicutes	Erysipelotrichia	Erysipelotrichales	Erysipelotrichaceae	Dubosiella	NA			0.329798	0.694779	0.0568828	0.773839	0.0268416	0.333743	0.117969	0.534961
ASV_88	Bacteria	Firmicutes	Erysipelotrichia	Erysipelotrichales	Erysipelotrichaceae	Faecalibaculum	NA			0.237896	0.609968	0.0957382	0.773839	0.114043	0.483976	0.23348	0.585985
ASV_89	Bacteria	Bacteroidetes	Bacteroidia	Bacteroidales	Bacteroidaceae	Bacteroides	acidifaciens	0.854109	0.915414	0.635201	0.91217	0.32462	0.773839	0.00940093	0.239334	0.0075868	0.383534
ASV_90	Bacteria	Bacteroidetes	Bacteroidia	Bacteroidales	Muribaculaceae	NA	NA	0.681743	0.783702	0.612758	0.91217	0.423602	0.773839	0.548372	0.813662	0.531358	0.784189
ASV_91	Bacteria	Firmicutes	Erysipelotrichia	Erysipelotrichales	Erysipelotrichaceae	Dubosiella	NA	0.841608	0.907639	0.0585762	0.459184	0.0871214	0.773839	0.00903564	0.239334	0.137076	0.534961
ASV_92	Bacteria	Proteobacteria	Gammaproteobacteria	Pasteurellales	Pasteurellaceae	Muribacter	NA	0.419567	0.632834
ASV_93	Bacteria	Bacteroidetes	Bacteroidia	Bacteroidales	Rikenellaceae	Alistipes	NA	0.208516	0.632834	0.0941334	0.459184	0.584626	0.773839	0.0655274	0.399368	0.166245	0.536282
ASV_94	Bacteria	Bacteroidetes	Bacteroidia	Bacteroidales	Prevotellaceae	Alloprevotella	NA	0.304574	0.632834	0.474017	0.840593	0.866757	0.917676	0.575552	0.840393	0.760352	0.918943
ASV_95	Bacteria	Proteobacteria	Alphaproteobacteria	Rhizobiales	Labraceae	Labrys	NA	0.274569	0.632834	0.123234	0.470685
ASV_96	Bacteria	Firmicutes	Bacilli	Lactobacillales	Lactobacillaceae	Lactobacillus	NA
ASV_97	Bacteria	Firmicutes	Erysipelotrichia	Erysipelotrichales	Erysipelotrichaceae	Faecalibaculum	rodentium	0.16367	0.632834	0.301495	0.66329	0.102796	0.773839	0.114141	0.483976	0.243888	0.594525
ASV_98	Bacteria	Bacteroidetes	Bacteroidia	Bacteroidales	Muribaculaceae	NA	NA	0.518814	0.652338	0.884825	0.987077	0.75824	0.845394	0.877434	0.954086	0.868131	0.955264
ASV_99	Bacteria	Firmicutes	Erysipelotrichia	Erysipelotrichales	Erysipelotrichaceae	Dubosiella	NA	0.159803	0.632834	0.214533	0.576557	0.0106671	0.603179	0.0205181	0.333743	0.118503	0.534961
ASV_100	Bacteria	Firmicutes	Clostridia	Clostridiales	Lachnospiraceae	NA	NA	0.697703	0.799205	0.702999	0.914856	0.00654338	0.603179	0.1433	0.533747	0.035324	0.489745
ASV_101	Bacteria	Firmicutes	Clostridia	Clostridiales	Lachnospiraceae	Lachnospiraceae_NK4A136_group	NA	0.657674	0.765126	0.624938	0.91217	0.590465	0.773839	0.21806	0.611954	0.18924	0.56183
ASV_102	Bacteria	Proteobacteria	Alphaproteobacteria	Sphingomonadales	Sphingomonadaceae	Sphingobium	yanoikuyae	0.317204	0.632834
ASV_103	Eukaryota	Euglenozoa	NA	NA	NA	NA	NA
ASV_104	Bacteria	Firmicutes	Bacilli	Lactobacillales	Streptococcaceae	Streptococcus	NA	0.785022	0.861506	0.827015	0.965084	0.68876	0.809813	0.262283	0.635267	0.0540791	0.489745
ASV_105	Bacteria	Firmicutes	Clostridia	Clostridiales	Lachnospiraceae	NA	NA	0.782233	0.859608	0.61525	0.91217	0.0633934	0.773839	0.679578	0.885125	0.468622	0.775616
ASV_106	Bacteria	Bacteroidetes	Bacteroidia	Bacteroidales	Muribaculaceae	NA	NA	0.215285	0.632834	0.0130871	0.459184	0.0969793	0.773839	0.0167128	0.31208	0.224232	0.585985
ASV_107	Bacteria	Proteobacteria	Alphaproteobacteria	Rhizobiales	Beijerinckiaceae	Methylobacterium	NA
ASV_108	Bacteria	Firmicutes	Clostridia	Clostridiales	Lachnospiraceae	Lachnospiraceae_NK4A136_group	NA	0.632475	0.744466	0.198228	0.559555	0.159791	0.773839	0.358196	0.7201	0.71924	0.889433
ASV_109	Bacteria	Bacteroidetes	Bacteroidia	Bacteroidales	Muribaculaceae	Muribaculum	NA	0.345013	0.632834	0.155759	0.515202	0.307225	0.773839	0.108265	0.482001	0.220338	0.581722
ASV_110	Bacteria	Firmicutes	Clostridia	Clostridiales	Lachnospiraceae	NA	NA	0.447687	0.632834	0.251928	0.626729	0.171716	0.773839	0.302303	0.660372	0.155583	0.536282
ASV_111	Bacteria	Proteobacteria	Gammaproteobacteria	Enterobacteriales	Enterobacteriaceae	Escherichia/Shigella	NA	0.345127	0.632834
ASV_112	Bacteria	Firmicutes	Clostridia	Clostridiales	Lachnospiraceae	NA	NA	0.778896	0.858267	0.787683	0.939674	0.785195	0.863863	0.976245	0.992601	0.642015	0.870084
ASV_113	Bacteria	Proteobacteria	Alphaproteobacteria	Rhizobiales	Xanthobacteraceae	Bradyrhizobium	NA	0.419689	0.632834
ASV_114	Bacteria	Firmicutes	Clostridia	Clostridiales	Lachnospiraceae	Lachnospiraceae_NK4A136_group	NA	0.306683	0.632834	0.614549	0.91217	0.221989	0.773839	0.173951	0.575311	0.237595	0.585985
ASV_115	Bacteria	Bacteroidetes	Bacteroidia	Bacteroidales	Muribaculaceae	NA	NA	0.172738	0.632834	0.584397	0.91217	0.26782	0.773839	0.44696	0.76201	0.448998	0.767515
ASV_116	Bacteria	Bacteroidetes	Bacteroidia	Bacteroidales	Muribaculaceae	NA	NA	0.317761	0.632834	0.759691	0.939674	0.31254	0.773839	0.326907	0.68856	0.0717271	0.489745
ASV_117	Bacteria	Firmicutes	Erysipelotrichia	Erysipelotrichales	Erysipelotrichaceae	Dubosiella	NA	0.34982	0.632834			0.183926	0.773839	0.0238251	0.333743	0.107655	0.534961
ASV_118	Bacteria	Bacteroidetes	Bacteroidia	Bacteroidales	Bacteroidaceae	Bacteroides	NA	0.218982	0.632834	0.323575	0.690014	0.320929	0.773839	0.00918591	0.239334	0.00560574	0.383534
ASV_119	Bacteria	Firmicutes	Clostridia	Clostridiales	Lachnospiraceae	Lachnospiraceae_NK4A136_group	NA	0.289566	0.632834	0.431186	0.799808	0.0486102	0.773839	0.135673	0.529071	0.04393	0.489745
ASV_120	Bacteria	Bacteroidetes	Bacteroidia	Bacteroidales	Muribaculaceae	NA	NA	0.314912	0.632834	0.0491099	0.459184	0.0373386	0.773839	0.00791129	0.239334	0.101588	0.534961
ASV_121	Bacteria	Firmicutes	Clostridia	Clostridiales	Lachnospiraceae	NA	NA	0.591654	0.710431	0.0599929	0.459184	0.418328	0.773839	0.0846947	0.42761	0.280521	0.616549
ASV_122	Bacteria	Bacteroidetes	Bacteroidia	Bacteroidales	Muribaculaceae	NA	NA	0.467431	0.632834	0.778937	0.939674	0.822892	0.88854	0.257388	0.635267	0.388191	0.731645
ASV_123	Bacteria	Firmicutes	Erysipelotrichia	Erysipelotrichales	Erysipelotrichaceae	Faecalibaculum	NA	0.268401	0.632834	0.254925	0.628017	0.102708	0.773839	0.0436113	0.357505
ASV_124	Bacteria	Bacteroidetes	Bacteroidia	Bacteroidales	Muribaculaceae	Muribaculum	NA			0.0644674	0.459184	0.155914	0.773839	0.0526766	0.37742	0.129198	0.534961
ASV_125	Bacteria	Bacteroidetes	Bacteroidia	Bacteroidales	Bacteroidaceae	Bacteroides	NA	0.429888	0.632834	0.790677	0.939674			0.0111062	0.245094	0.058888	0.489745
ASV_126	Bacteria	Bacteroidetes	Bacteroidia	Bacteroidales	Muribaculaceae	Muribaculum	NA	0.406475	0.632834	0.617245	0.91217	0.872726	0.917676	0.825261	0.938324	0.73172	0.903402
ASV_127	Bacteria	Firmicutes	Clostridia	Clostridiales	Lachnospiraceae	NA	NA	0.608477	0.726766	0.843482	0.966861	0.41259	0.773839	0.407592	0.752418	0.157954	0.536282
ASV_128	Bacteria	Firmicutes	Clostridia	Clostridiales	Lachnospiraceae	Lachnospiraceae_NK4A136_group	NA	0.115652	0.632834	0.592847	0.91217	0.251643	0.773839	0.657677	0.877204	0.969598	0.989164
ASV_129	Bacteria	Firmicutes	Clostridia	Clostridiales	Lachnospiraceae	Lachnospiraceae_UCG-006	NA	0.989869	0.992316	0.624337	0.91217	0.870642	0.917676	0.908385	0.969371	0.545805	0.797795
ASV_130	Bacteria	Firmicutes	Clostridia	Clostridiales	Lachnospiraceae	Lachnospiraceae_NK4A136_group	NA	0.939588	0.976931	0.528593	0.890449	0.0114003	0.603179	0.396496	0.74481	0.694899	0.882497
ASV_131	Bacteria	Bacteroidetes	Bacteroidia	Bacteroidales	Muribaculaceae	NA	NA	0.142843	0.632834	0.430487	0.799808	0.479284	0.773839	0.657159	0.877204	0.556624	0.806745
ASV_132	Bacteria	Firmicutes	Bacilli	Lactobacillales	Lactobacillaceae	Lactobacillus	NA
ASV_133	Bacteria	Bacteroidetes	Bacteroidia	Bacteroidales	Bacteroidaceae	Bacteroides	acidifaciens	0.159803	0.632834	0.141138	0.494506	0.912366	0.948209	0.000338782	0.0657915	0.0698244	0.489745
ASV_134	Bacteria	Firmicutes	Bacilli	Lactobacillales	Streptococcaceae	Streptococcus	NA	0.903544	0.951655			0.398243	0.773839			0.275851	0.613443
ASV_135	Bacteria	Bacteroidetes	Bacteroidia	Bacteroidales	Muribaculaceae	NA	NA	0.186236	0.632834	0.112027	0.459184	0.95731	0.976873	0.383847	0.732251	0.400174	0.744715
ASV_136	Bacteria	Bacteroidetes	Bacteroidia	Bacteroidales	Muribaculaceae	Muribaculum	NA	0.436828	0.632834	0.766954	0.939674	0.928801	0.956747	0.474647	0.771997	0.939833	0.987731
ASV_137	Bacteria	Proteobacteria	Alphaproteobacteria	Rhizobiales	Xanthobacteraceae	Bradyrhizobium	NA	0.297213	0.632834
ASV_138	Bacteria	Bacteroidetes	Bacteroidia	Bacteroidales	Rikenellaceae	Alistipes	NA	0.130494	0.632834	0.848303	0.966861	0.184499	0.773839	0.0698133	0.408366	0.0516324	0.489745
ASV_139	Bacteria	Firmicutes	Clostridia	Clostridiales	Lachnospiraceae	Lachnospiraceae_NK4A136_group	NA	0.984766	0.990702	0.785722	0.939674	0.254322	0.773839	0.241499	0.62943	0.269319	0.609764
ASV_140	Bacteria	Bacteroidetes	Bacteroidia	Bacteroidales	Rikenellaceae	Rikenellaceae_RC9_gut_group	NA	0.327312	0.632834	0.164453	0.525584	0.0230494	0.745264	0.16156	0.550439	0.0548443	0.489745
ASV_141	Bacteria	Bacteroidetes	Bacteroidia	Bacteroidales	Bacteroidaceae	Bacteroides	NA	0.34982	0.632834			0.596949	0.773839	0.0395347	0.342131	0.0799898	0.517595
ASV_142	Bacteria	Proteobacteria	Alphaproteobacteria	Rhizobiales	Rhizobiaceae	Mesorhizobium	NA	0.422542	0.632834
ASV_143	Bacteria	Firmicutes	Clostridia	Clostridiales	Lachnospiraceae	NA	NA	0.350354	0.632834	0.932494	0.991211	0.609896	0.773839	0.671852	0.885125	0.874491	0.955264
ASV_144	Bacteria	Firmicutes	Clostridia	Clostridiales	Lachnospiraceae	NA	NA	0.795611	0.868426	0.0508872	0.459184	0.0186445	0.713625	0.464647	0.768755	0.0232269	0.453382
ASV_145	Bacteria	Bacteroidetes	Bacteroidia	Bacteroidales	Marinifilaceae	Odoribacter	NA	0.428771	0.632834	0.0139455	0.459184	0.888788	0.932026	0.126514	0.509731	0.0886052	0.52817
ASV_146	Eukaryota	NA	NA	NA	NA	NA	NA
ASV_147	Bacteria	Proteobacteria	Gammaproteobacteria	Betaproteobacteriales	Burkholderiaceae	Aquabacterium	NA
ASV_148	Bacteria	Firmicutes	Clostridia	Clostridiales	Lachnospiraceae	NA	NA	0.826121	0.894505	0.560814	0.902585	0.508478	0.773839	0.31749	0.679038	0.154777	0.536282
ASV_149	Bacteria	Firmicutes	Clostridia	Clostridiales	Ruminococcaceae	Ruminiclostridium_6	NA	0.860557	0.918305	0.140079	0.494457	0.663074	0.801328	0.0277263	0.333743	0.0945508	0.534961
ASV_150	Bacteria	Firmicutes	Clostridia	Clostridiales	Lachnospiraceae	Lachnospiraceae_NK4A136_group	NA					0.524818	0.773839	0.398306	0.74481	0.373638	0.723913
ASV_151	Bacteria	Proteobacteria	Gammaproteobacteria	Pasteurellales	Pasteurellaceae	Muribacter	NA	0.415142	0.632834
ASV_152	Bacteria	Bacteroidetes	Bacteroidia	Bacteroidales	Muribaculaceae	NA	NA	0.321683	0.632834	0.348747	0.70797	0.324688	0.773839	0.0312368	0.333743	0.0353534	0.489745
ASV_153	Bacteria	Firmicutes	Clostridia	Clostridiales	Lachnospiraceae	Lachnospiraceae_NK4A136_group	NA	0.195287	0.632834	0.478661	0.844801	0.18167	0.773839	0.377986	0.729469	0.76594	0.918943
ASV_154	Bacteria	Bacteroidetes	Bacteroidia	Bacteroidales	Prevotellaceae	Prevotellaceae_UCG-001	NA	0.30424	0.632834	0.383989	0.753638	0.088875	0.773839	0.0943771	0.460503	0.0494189	0.489745
ASV_155	Bacteria	Bacteroidetes	Bacteroidia	Bacteroidales	Muribaculaceae	NA	NA	0.406747	0.632834	0.445158	0.818083	0.421229	0.773839	0.354083	0.719278	0.378959	0.726498
ASV_156	Bacteria	Bacteroidetes	Bacteroidia	Bacteroidales	Muribaculaceae	Muribaculum	NA			0.457148	0.828455	0.285673	0.773839	0.267909	0.640083	0.28216	0.616549
ASV_157	Bacteria	Firmicutes	Erysipelotrichia	Erysipelotrichales	Erysipelotrichaceae	Faecalibaculum	NA	0.181915	0.632834	0.677692	0.913244	0.102494	0.773839	0.108914	0.482001
ASV_158	Bacteria	Proteobacteria	Alphaproteobacteria	Sphingomonadales	Sphingomonadaceae	Sphingomonas	NA
ASV_159	Bacteria	Firmicutes	Bacilli	Lactobacillales	Lactobacillaceae	Lactobacillus	NA			0.26045	0.633355	0.378839	0.773839	0.370221	0.729469
ASV_160	Bacteria	Bacteroidetes	Bacteroidia	Bacteroidales	Muribaculaceae	NA	NA	0.16367	0.632834	0.440571	0.814023	0.0113008	0.603179	0.0273978	0.333743	0.181722	0.554075
ASV_161	Bacteria	Firmicutes	Clostridia	Clostridiales	Lachnospiraceae	NA	NA	0.447805	0.632834	0.968302	0.991211	0.399501	0.773839	0.453185	0.766161	0.531248	0.784189
ASV_162	Bacteria	Firmicutes	Erysipelotrichia	Erysipelotrichales	Erysipelotrichaceae	Faecalibaculum	NA	0.171623	0.632834	0.257633	0.631402	0.103558	0.773839	0.109247	0.482001	0.130791	0.534961
ASV_163	Bacteria	Firmicutes	Clostridia	Clostridiales	Lachnospiraceae	Lachnoclostridium	NA	0.347377	0.632834	0.0332676	0.459184	0.380355	0.773839	0.398388	0.74481	0.233713	0.585985
ASV_164	Bacteria	Bacteroidetes	Bacteroidia	Bacteroidales	Muribaculaceae	NA	NA	0.176696	0.632834			0.142972	0.773839	0.6621	0.879479	0.969718	0.989164
ASV_165	Bacteria	Proteobacteria	Alphaproteobacteria	Rhizobiales	Xanthobacteraceae	Afipia	NA	0.220529	0.632834	0.925387	0.991211
ASV_166	Bacteria	Bacteroidetes	Bacteroidia	Bacteroidales	Muribaculaceae	NA	NA	0.305988	0.632834	0.660003	0.91217	0.871956	0.917676	0.930862	0.975045	0.478537	0.778515
ASV_167	Bacteria	Proteobacteria	Gammaproteobacteria	Enterobacteriales	Enterobacteriaceae	Yokenella	NA	0.32536	0.632834
ASV_168	Bacteria	Bacteroidetes	Bacteroidia	Bacteroidales	Muribaculaceae	NA	NA			0.782357	0.939674	0.391629	0.773839	0.447988	0.76201	0.443352	0.767515
ASV_169	Bacteria	Bacteroidetes	Bacteroidia	Bacteroidales	Marinifilaceae	Odoribacter	NA			0.186733	0.552029	0.198738	0.773839	0.00529697	0.223624	0.0024802	0.270342
ASV_170	Bacteria	Firmicutes	Clostridia	Clostridiales	Lachnospiraceae	Lachnospiraceae_NK4A136_group	NA			0.205224	0.56309	0.164401	0.773839	0.0610911	0.399368	0.0683999	0.489745
ASV_171	Bacteria	Firmicutes	Clostridia	Clostridiales	Lachnospiraceae	Lachnoclostridium	NA	0.669413	0.774457	0.0824789	0.459184	0.292822	0.773839	0.68761	0.885125	0.214104	0.579296
ASV_172	Bacteria	Bacteroidetes	Bacteroidia	Bacteroidales	Muribaculaceae	NA	NA	0.176696	0.632834	0.064739	0.459184	0.52317	0.773839	0.446389	0.76201	0.111401	0.534961
ASV_173	Bacteria	Bacteroidetes	Bacteroidia	Bacteroidales	Tannerellaceae	Parabacteroides	distasonis	0.400771	0.632834	0.941006	0.991211	0.351355	0.773839	0.00633083	0.239334	0.00956662	0.383534
ASV_174	Bacteria	Firmicutes	Clostridia	Clostridiales	Lachnospiraceae	Lachnospiraceae_NK4A136_group	NA			0.230857	0.599974	0.972215	0.982499	0.978548	0.993901	0.930968	0.984508
ASV_175	Bacteria	Proteobacteria	Gammaproteobacteria	Pasteurellales	Pasteurellaceae	Muribacter	NA	0.140442	0.632834
ASV_176	Bacteria	Firmicutes	Clostridia	Clostridiales	Lachnospiraceae	Lachnospiraceae_NK4A136_group	NA			0.161061	0.521651	0.161103	0.773839	0.0610696	0.399368	0.0963348	0.534961
ASV_177	Bacteria	Bacteroidetes	Bacteroidia	Chitinophagales	Chitinophagaceae	Vibrionimonas	NA	0.32516	0.632834
ASV_178	Bacteria	Bacteroidetes	Bacteroidia	Bacteroidales	Muribaculaceae	NA	NA	0.375291	0.632834	0.261108	0.633355	0.0291841	0.773839	0.0814806	0.42761	0.280435	0.616549
ASV_179	Bacteria	Proteobacteria	Gammaproteobacteria	Enterobacteriales	Enterobacteriaceae	Escherichia/Shigella	NA	0.482073	0.632834	0.113558	0.459184
ASV_180	Bacteria	Bacteroidetes	Bacteroidia	Bacteroidales	Rikenellaceae	Rikenellaceae_RC9_gut_group	NA			0.657194	0.91217	0.469848	0.773839	0.139321	0.530512	0.0448451	0.489745
ASV_181	Bacteria	Bacteroidetes	Bacteroidia	Bacteroidales	Muribaculaceae	NA	NA	0.331105	0.632834	0.270198	0.647097	0.108211	0.773839	0.0388782	0.342131	0.0115559	0.383534
ASV_182	Bacteria	Firmicutes	Clostridia	Clostridiales	Lachnospiraceae	NA	NA	0.326373	0.632834	0.457819	0.828455	0.962974	0.976873	0.937669	0.976906	0.93852	0.987731
ASV_183	Bacteria	Bacteroidetes	Bacteroidia	Bacteroidales	Muribaculaceae	NA	NA	0.331105	0.632834	0.514332	0.88297	0.0531036	0.773839	0.208136	0.605574	0.0337739	0.489745
ASV_184	Bacteria	Firmicutes	Clostridia	Clostridiales	Lachnospiraceae	Lachnospiraceae_NK4A136_group	NA	0.78918	0.864899	0.0731994	0.459184	0.161775	0.773839	0.497136	0.795254	0.649034	0.871853
ASV_185	Bacteria	Bacteroidetes	Bacteroidia	Bacteroidales	Tannerellaceae	Parabacteroides	distasonis	0.180952	0.632834	0.954184	0.991211	0.530537	0.773839	0.0300535	0.333743
ASV_186	Bacteria	Proteobacteria	Alphaproteobacteria	Rhizobiales	Xanthobacteraceae	Afipia	NA	0.170428	0.632834	0.24872	0.625768
ASV_187	Bacteria	Bacteroidetes	Bacteroidia	Bacteroidales	Muribaculaceae	NA	NA	0.340987	0.632834	0.466354	0.832397	0.172935	0.773839	0.738879	0.899426	0.85756	0.953892
ASV_188	Bacteria	Firmicutes	Clostridia	Clostridiales	Lachnospiraceae	Lachnospiraceae_NK4A136_group	NA	0.304893	0.632834			0.257375	0.773839	0.0207342	0.333743	0.0316073	0.489745
ASV_189	Bacteria	Firmicutes	Clostridia	Clostridiales	Lachnospiraceae	Lachnospiraceae_NK4A136_group	NA	0.580875	0.701026			0.390126	0.773839	0.231067	0.62943	0.407463	0.750952
ASV_190	Bacteria	Firmicutes	Clostridia	Clostridiales	Ruminococcaceae	Ruminococcaceae_UCG-014	NA	0.268401	0.632834	0.731197	0.929722	0.46304	0.773839	0.726257	0.897504	0.966861	0.988894
ASV_191	Bacteria	Firmicutes	Clostridia	Clostridiales	Lachnospiraceae	Lachnospiraceae_NK4A136_group	NA	0.39866	0.632834	0.511712	0.88297			0.0391287	0.342131	0.198362	0.571172
ASV_192	Bacteria	Proteobacteria	Alphaproteobacteria	Sphingomonadales	Sphingomonadaceae	Sphingomonas	NA	0.834787	0.901481
ASV_193	Bacteria	Bacteroidetes	Bacteroidia	Bacteroidales	Rikenellaceae	Alistipes	NA	0.680136	0.783509	0.374275	0.743831	0.859761	0.915691	0.00485772	0.214402	0.337528	0.689745
ASV_194	Bacteria	Firmicutes	Clostridia	Clostridiales	Lachnospiraceae	Lachnospiraceae_UCG-006	NA	0.325866	0.632834	0.0948692	0.459184	0.0372908	0.773839	0.55582	0.817729	0.204744	0.574337
ASV_195	Bacteria	Firmicutes	Clostridia	Clostridiales	Lachnospiraceae	Lachnospiraceae_NK4A136_group	NA	0.303612	0.632834	0.462664	0.832092	0.0840244	0.773839	0.114879	0.484989	0.0475625	0.489745
ASV_196	Bacteria	Bacteroidetes	Bacteroidia	Bacteroidales	Muribaculaceae	Muribaculum	NA	0.343081	0.632834	0.466138	0.832397	0.284897	0.773839	0.26235	0.635267	0.276572	0.613443
ASV_197	Bacteria	Firmicutes	Clostridia	Clostridiales	Lachnospiraceae	Lachnospiraceae_NK4A136_group	NA			0.0775994	0.459184			0.0393928	0.342131	0.0522272	0.489745
ASV_198	Bacteria	Firmicutes	Clostridia	Clostridiales	Lachnospiraceae	NA	NA	0.913026	0.95915			0.392772	0.773839	0.855495	0.94714	0.55672	0.806745
ASV_199	Bacteria	Proteobacteria	Gammaproteobacteria	Betaproteobacteriales	Burkholderiaceae	Pelomonas	NA					0.808849	0.878265
ASV_200	Bacteria	Firmicutes	Clostridia	Clostridiales	Lachnospiraceae	NA	NA	0.682236	0.783702	0.713966	0.917679	0.381383	0.773839	0.702784	0.891849	0.404374	0.747064
ASV_201	Bacteria	Firmicutes	Clostridia	Clostridiales	Lachnospiraceae	Lachnospiraceae_NK4A136_group	NA	0.207976	0.632834	0.0721429	0.459184	0.486138	0.773839	0.890235	0.964753	0.173733	0.541054
ASV_202	Bacteria	Bacteroidetes	Bacteroidia	Bacteroidales	Muribaculaceae	NA	NA			0.234987	0.607372	0.269028	0.773839	0.103574	0.476638	0.106278	0.534961
ASV_203	Bacteria	Proteobacteria	Alphaproteobacteria	Rhizobiales	Xanthobacteraceae	Afipia	NA	0.364668	0.632834
ASV_204	Bacteria	Firmicutes	Clostridia	Clostridiales	Lachnospiraceae	NA	NA	0.458658	0.632834	0.113559	0.459184	0.862197	0.915691	0.203825	0.605574	0.452095	0.768259
ASV_205	Bacteria	Firmicutes	Clostridia	Clostridiales	Lachnospiraceae	NA	NA			0.581103	0.91217	0.643956	0.794031	0.688269	0.885125	0.371702	0.723913
ASV_206	Bacteria	Firmicutes	Erysipelotrichia	Erysipelotrichales	Erysipelotrichaceae	Turicibacter	NA			0.482097	0.845988	0.719688	0.824576	0.17597	0.575311
ASV_207	Bacteria	Firmicutes	Clostridia	Clostridiales	Lachnospiraceae	Lachnospiraceae_NK4A136_group	NA	0.305612	0.632834	0.109546	0.459184	0.398817	0.773839	0.00945135	0.239334	0.0396129	0.489745
ASV_208	Bacteria	Firmicutes	Clostridia	Clostridiales	Lachnospiraceae	Lachnospiraceae_NK4A136_group	NA	0.11841	0.632834	0.105508	0.459184	0.0487209	0.773839	0.466691	0.768755	0.858753	0.953892
ASV_209	Bacteria	Patescibacteria	Saccharimonadia	Saccharimonadales	Saccharimonadaceae	Candidatus_Saccharimonas	NA			0.290699	0.659396	0.666486	0.801435	0.0825132	0.42761	0.318187	0.666968
ASV_210	Bacteria	Deferribacteres	Deferribacteres	Deferribacterales	Deferribacteraceae	Mucispirillum	schaedleri	0.118061	0.632834	0.658259	0.91217	0.571276	0.773839	0.89445	0.966248	0.248322	0.597697
ASV_211	Bacteria	Firmicutes	Clostridia	Clostridiales	Lachnospiraceae	Lachnospiraceae_NK4A136_group	NA	0.888216	0.93917			0.0826888	0.773839	0.969677	0.986957	0.714712	0.886793
ASV_212	Bacteria	Firmicutes	Clostridia	Clostridiales	Lachnospiraceae	NA	NA	0.640786	0.753155	0.672709	0.91217	0.963445	0.976873	0.645034	0.87353	0.876739	0.955264
ASV_213	Bacteria	Bacteroidetes	Bacteroidia	Bacteroidales	Muribaculaceae	NA	NA	0.314912	0.632834	0.409516	0.774282	0.359656	0.773839	0.682025	0.885125	0.246844	0.597583
ASV_214	Bacteria	Firmicutes	Clostridia	Clostridiales	Lachnospiraceae	Lachnospiraceae_NK4A136_group	bacterium	0.709146	0.807749			0.421309	0.773839	0.775391	0.914165	0.517696	0.779247
ASV_215	Bacteria	Firmicutes	Clostridia	Clostridiales	Lachnospiraceae	Lachnospiraceae_NK4A136_group	NA							0.0391086	0.342131	0.202167	0.571172
ASV_216	Bacteria	Firmicutes	Clostridia	Clostridiales	Ruminococcaceae	Ruminococcus_1	NA	0.304395	0.632834	0.978406	0.991211	0.101406	0.773839	0.864049	0.952317	0.583663	0.821672
ASV_217	Bacteria	Firmicutes	Clostridia	Clostridiales	Lachnospiraceae	NA	NA	0.360748	0.632834	0.901935	0.991211	0.212901	0.773839	0.0674571	0.400542	0.142444	0.534961
ASV_218	Bacteria	Proteobacteria	Alphaproteobacteria	Rhizobiales	Xanthobacteraceae	Bradyrhizobium	NA	0.282299	0.632834
ASV_219	Bacteria	Firmicutes	Clostridia	Clostridiales	Lachnospiraceae	Lachnospiraceae_UCG-001	NA	0.180952	0.632834	0.955846	0.991211	0.720623	0.824576	0.373048	0.729469	0.159457	0.536282
ASV_220	Bacteria	Firmicutes	Clostridia	Clostridiales	Lachnospiraceae	Roseburia	NA	0.303677	0.632834	0.989459	0.992902	0.469848	0.773839	0.0286748	0.333743
ASV_221	Bacteria	Proteobacteria	Alphaproteobacteria	Rhizobiales	Xanthobacteraceae	Bradyrhizobium	NA	0.43108	0.632834
ASV_222	Bacteria	Firmicutes	Clostridia	Clostridiales	Lachnospiraceae	Lachnospiraceae_NK4A136_group	bacterium	0.168697	0.632834					0.921988	0.970803	0.960132	0.988894
ASV_223	Bacteria	Bacteroidetes	Bacteroidia	Bacteroidales	Rikenellaceae	Alistipes	NA	0.268007	0.632834	0.848303	0.966861	0.873207	0.917676	0.470486	0.769226	0.448497	0.767515
ASV_224	Bacteria	Firmicutes	Clostridia	Clostridiales	Lachnospiraceae	NA	NA	0.29734	0.632834			0.738159	0.832864	0.103284	0.476638	0.619504	0.853216
ASV_225	Bacteria	Firmicutes	Clostridia	Clostridiales	Lachnospiraceae	Lachnospiraceae_NK4A136_group	NA	0.588312	0.708946			0.292822	0.773839	0.0222836	0.333743	0.00758289	0.383534
ASV_226	Bacteria	Firmicutes	Clostridia	Clostridiales	Lachnospiraceae	Lachnospiraceae_NK4A136_group	NA	0.753069	0.836178			0.393764	0.773839	0.434068	0.761995	0.908591	0.968512
ASV_227	Bacteria	Firmicutes	Clostridia	Clostridiales	Lachnospiraceae	Lachnospiraceae_NK4A136_group	NA	0.321848	0.632834	0.318808	0.688566			0.0384553	0.342131	0.199142	0.571172
ASV_228	Bacteria	Proteobacteria	Alphaproteobacteria	Rhizobiales	Xanthobacteraceae	Bradyrhizobium	NA	0.255913	0.632834
ASV_229	Bacteria	Bacteroidetes	Bacteroidia	Bacteroidales	Tannerellaceae	Parabacteroides	goldsteinii			0.357204	0.722041	0.456299	0.773839	0.028071	0.333743	0.00375469	0.358103
ASV_230	Bacteria	Bacteroidetes	Bacteroidia	Bacteroidales	Muribaculaceae	NA	NA	0.31377	0.632834	0.0961486	0.459184	0.10435	0.773839	0.0675044	0.400542	0.156969	0.536282
ASV_231	Bacteria	Firmicutes	Clostridia	Clostridiales	Lachnospiraceae	Lachnospiraceae_NK4A136_group	NA	0.191231	0.632834					0.531405	0.808555	0.623209	0.855232
ASV_232	Bacteria	Proteobacteria	Alphaproteobacteria	NA	NA	NA	NA	0.230217	0.632834	0.155562	0.515202	0.302204	0.773839	0.0780563	0.423423	0.0331528	0.489745
ASV_233	Bacteria	Firmicutes	Clostridia	Clostridiales	Lachnospiraceae	Lachnospiraceae_NK4A136_group	NA	0.406566	0.632834	0.64708	0.91217	0.341517	0.773839	0.933798	0.976428	0.640675	0.869814
ASV_234	Bacteria	Bacteroidetes	Bacteroidia	Bacteroidales	Muribaculaceae	NA	NA			0.535986	0.892681	0.99539	0.99539	0.133955	0.526872	0.188159	0.56183
ASV_235	Bacteria	Firmicutes	Clostridia	Clostridiales	Lachnospiraceae	Lachnospiraceae_NK4A136_group	NA			0.171782	0.534204	0.612955	0.773839	0.0714318	0.410121	0.115465	0.534961
ASV_236	Bacteria	Firmicutes	Clostridia	Clostridiales	Lachnospiraceae	Lachnospiraceae_NK4A136_group	NA	0.885576	0.93917			0.507915	0.773839	0.640871	0.873106	0.170916	0.536282
ASV_237	Bacteria	Firmicutes	Clostridia	Clostridiales	Lachnospiraceae	Lachnospiraceae_NK4A136_group	NA	0.144812	0.632834	0.83655	0.965094	0.531328	0.773839	0.749819	0.90082	0.959504	0.988894
ASV_238	Bacteria	Firmicutes	Clostridia	Clostridiales	Lachnospiraceae	NA	NA	0.85209	0.915292			0.177192	0.773839	0.37746	0.729469	0.52534	0.784189
ASV_239	Bacteria	Proteobacteria	Gammaproteobacteria	Enterobacteriales	Enterobacteriaceae	Escherichia/Shigella	NA					0.560642	0.773839
ASV_240	Bacteria	Firmicutes	Clostridia	Clostridiales	Lachnospiraceae	Lachnoclostridium	NA	0.440129	0.632834			0.529513	0.773839	0.913316	0.969371	0.965311	0.988894
ASV_241	Bacteria	Bacteroidetes	Bacteroidia	Bacteroidales	Muribaculaceae	NA	NA	0.206492	0.632834			0.283605	0.773839	0.207111	0.605574	0.282821	0.616549
ASV_242	Bacteria	Proteobacteria	Alphaproteobacteria	Rhizobiales	Xanthobacteraceae	Bradyrhizobium	NA	0.39461	0.632834
ASV_243	Bacteria	Firmicutes	Clostridia	Clostridiales	Peptococcaceae	NA	NA	0.493944	0.634847	0.298616	0.663112	0.382638	0.773839	0.322069	0.684309	0.168497	0.536282
ASV_244	Bacteria	Actinobacteria	Actinobacteria	Micrococcales	Micrococcaceae	Arthrobacter	NA
ASV_245	Bacteria	Firmicutes	Clostridia	Clostridiales	Lachnospiraceae	Lachnospiraceae_NK4A136_group	NA	0.975382	0.986328	0.18107	0.538654	0.296553	0.773839	0.776672	0.914165	0.437848	0.767515
ASV_246	Eukaryota	NA	NA	NA	NA	NA	NA
ASV_247	Bacteria	Firmicutes	Clostridia	Clostridiales	Lachnospiraceae	Lachnospiraceae_NK4A136_group	NA							0.0384768	0.342131	0.144659	0.534961
ASV_248	Bacteria	Actinobacteria	Actinobacteria	Micrococcales	Microbacteriaceae	Microbacterium	NA	0.300014	0.632834	0.757725	0.939674
ASV_249	Bacteria	Firmicutes	Clostridia	Clostridiales	Lachnospiraceae	NA	NA	0.486519	0.633163					0.613081	0.866523	0.803461	0.924646
ASV_250	Bacteria	Proteobacteria	Alphaproteobacteria	Rhizobiales	Xanthobacteraceae	Bradyrhizobium	NA	0.324059	0.632834
ASV_251	Bacteria	Bacteroidetes	Bacteroidia	Bacteroidales	Rikenellaceae	Alistipes	NA	0.305148	0.632834	0.707902	0.914856	0.689636	0.809813	0.720438	0.897504	0.499038	0.779114
ASV_252	Bacteria	Proteobacteria	Deltaproteobacteria	Desulfovibrionales	Desulfovibrionaceae	NA	NA	0.260372	0.632834	0.778401	0.939674	0.97237	0.982499	0.00269231	0.173897	0.0102302	0.383534
ASV_253	Bacteria	Proteobacteria	Alphaproteobacteria	Rhizobiales	Xanthobacteraceae	Bradyrhizobium	NA	0.323831	0.632834
ASV_254	Bacteria	Firmicutes	Clostridia	Clostridiales	Lachnospiraceae	Lachnospiraceae_NK4A136_group	NA	0.341906	0.632834	0.846814	0.966861	0.507915	0.773839	0.39683	0.74481	0.668379	0.874776
ASV_255	Bacteria	Firmicutes	Clostridia	Clostridiales	Lachnospiraceae	Lachnospiraceae_NK4A136_group	NA			0.101202	0.459184	0.208696	0.773839	0.465534	0.768755	0.328889	0.675304
ASV_256	Bacteria	Firmicutes	Clostridia	Clostridiales	Lachnospiraceae	Lachnospiraceae_NK4A136_group	NA	0.250819	0.632834					0.422316	0.761995	0.645519	0.870402
ASV_257	Bacteria	Firmicutes	Clostridia	Clostridiales	Lachnospiraceae	NA	NA	0.82032	0.889411	0.0239652	0.459184	0.24749	0.773839	0.441092	0.76201	0.281229	0.616549
ASV_258	Bacteria	Proteobacteria	Deltaproteobacteria	Desulfovibrionales	Desulfovibrionaceae	Desulfovibrio	NA	0.31429	0.632834	0.783008	0.939674	0.686909	0.809813	0.639437	0.873106
ASV_259	Bacteria	Patescibacteria	Saccharimonadia	Saccharimonadales	Saccharimonadaceae	Candidatus_Saccharimonas	NA	0.747301	0.832501	0.916953	0.991211	0.481855	0.773839	0.779488	0.915215	0.177214	0.545279
ASV_260	Bacteria	Proteobacteria	Gammaproteobacteria	Pasteurellales	Pasteurellaceae	Muribacter	NA	0.396475	0.632834
ASV_261	Bacteria	Firmicutes	Clostridia	Clostridiales	Lachnospiraceae	Lachnoclostridium	NA					0.239757	0.773839	0.550542	0.813662	0.050775	0.489745
ASV_262	Eukaryota	NA	NA	NA	NA	NA	NA
ASV_263	Bacteria	Firmicutes	Clostridia	Clostridiales	Lachnospiraceae	Lachnospiraceae_NK4A136_group	NA	0.303529	0.632834			0.0633531	0.773839	0.0639588	0.399368	0.145661	0.534961
ASV_264	Bacteria	Firmicutes	Clostridia	Clostridiales	Lachnospiraceae	Roseburia	NA	0.341906	0.632834			0.304633	0.773839	0.207124	0.605574	0.014408	0.407161
ASV_265	Bacteria	Bacteroidetes	Bacteroidia	Bacteroidales	Muribaculaceae	Muribaculum	NA	0.185431	0.632834	0.322613	0.690014	0.25134	0.773839			0.898295	0.963993
ASV_266	Bacteria	Firmicutes	Clostridia	Clostridiales	Lachnospiraceae	Lachnospiraceae_NK4A136_group	NA	0.571559	0.698243	0.872139	0.975229	0.229658	0.773839	0.662053	0.879479	0.865124	0.954866
ASV_267	Bacteria	Bacteroidetes	Bacteroidia	Bacteroidales	Muribaculaceae	NA	NA	0.3062	0.632834	0.976305	0.991211	0.533218	0.773839	0.791748	0.923679	0.34152	0.693032
ASV_268	Bacteria	Firmicutes	Clostridia	Clostridiales	Lachnospiraceae	Lachnospiraceae_UCG-001	NA	0.391587	0.632834			0.159109	0.773839	0.245562	0.62943	0.786446	0.922198
ASV_269	Bacteria	Bacteroidetes	Bacteroidia	Bacteroidales	Muribaculaceae	NA	NA	0.305445	0.632834	0.253077	0.626729	0.117611	0.773839	0.370013	0.729469	0.0319604	0.489745
ASV_270	Bacteria	Firmicutes	Clostridia	Clostridiales	Ruminococcaceae	NA	NA			0.543987	0.894172	0.117795	0.773839	0.412107	0.757866	0.177948	0.545279
ASV_271	Bacteria	Actinobacteria	Coriobacteriia	Coriobacteriales	Eggerthellaceae	NA	NA			0.0227022	0.459184	0.0196186	0.713625	0.00278474	0.173897	0.779824	0.918943
ASV_272	Bacteria	Firmicutes	Clostridia	Clostridiales	Lachnospiraceae	Lachnospiraceae_NK4A136_group	NA			0.092136	0.459184			0.435055	0.761995	0.389316	0.731645
ASV_273	Bacteria	Firmicutes	Clostridia	Clostridiales	Lachnospiraceae	Lachnospiraceae_NK4A136_group	NA					0.593913	0.773839	0.4537	0.766161	0.604173	0.838153
ASV_274	Bacteria	Proteobacteria	Gammaproteobacteria	Enterobacteriales	Enterobacteriaceae	Escherichia/Shigella	NA	0.148629	0.632834			0.608385	0.773839
ASV_275	Bacteria	Firmicutes	Clostridia	Clostridiales	Clostridiales_vadinBB60_group	NA	NA			0.281147	0.653857	0.264848	0.773839	0.604191	0.861316	0.240978	0.589315
ASV_276	Bacteria	Firmicutes	Bacilli	Lactobacillales	Lactobacillaceae	Lactobacillus	NA			0.613141	0.91217	0.185186	0.773839	0.249958	0.62943
ASV_277	Bacteria	Firmicutes	Clostridia	Clostridiales	Ruminococcaceae	Oscillibacter	NA	0.726962	0.822268	0.123393	0.470685	0.288496	0.773839	0.126225	0.509731	0.274062	0.613223
ASV_278	Bacteria	Firmicutes	Clostridia	Clostridiales	Lachnospiraceae	Lachnospiraceae_UCG-006	NA	0.201263	0.632834	0.745679	0.939674	0.283624	0.773839	0.260405	0.635267	0.126576	0.534961
ASV_279	Bacteria	Firmicutes	Clostridia	Clostridiales	Lachnospiraceae	NA	NA	0.80255	0.871309	0.746865	0.939674	0.232668	0.773839	0.757135	0.905392	0.171498	0.536282
ASV_280	Bacteria	Firmicutes	Clostridia	Clostridiales	Lachnospiraceae	Lachnospiraceae_UCG-006	NA	0.192454	0.632834			0.35774	0.773839	0.263383	0.636182
ASV_281	Bacteria	Bacteroidetes	Bacteroidia	Bacteroidales	Muribaculaceae	NA	NA			0.974108	0.991211	0.596938	0.773839	0.0232195	0.333743	0.311516	0.661834
ASV_282	Bacteria	Firmicutes	Clostridia	Clostridiales	Lachnospiraceae	NA	NA	0.176696	0.632834	0.941006	0.991211	0.507915	0.773839	0.0730105	0.4126	0.645672	0.870402
ASV_283	Bacteria	Firmicutes	Clostridia	Clostridiales	Lachnospiraceae	Lachnospiraceae_NK4A136_group	NA							0.476065	0.773008	0.395899	0.740369
ASV_284	Bacteria	Firmicutes	Clostridia	Clostridiales	Ruminococcaceae	Anaerotruncus	NA	0.489831	0.633163	0.707902	0.914856	0.195668	0.773839	0.05211	0.37742	0.572946	0.815593
ASV_285	Bacteria	Bacteroidetes	Bacteroidia	Bacteroidales	Muribaculaceae	NA	NA	0.321683	0.632834	0.113583	0.459184	0.0819724	0.773839	0.818252	0.932538	0.210521	0.577516
ASV_286	Bacteria	Firmicutes	Clostridia	Clostridiales	Lachnospiraceae	Lachnospiraceae_NK4A136_group	NA					0.406372	0.773839	0.727629	0.897504	0.834189	0.947153
ASV_287	Bacteria	Firmicutes	Clostridia	Clostridiales	Lachnospiraceae	Lachnospiraceae_NK4A136_group	NA							0.436105	0.761995	0.388703	0.731645
ASV_288	Bacteria	Proteobacteria	Gammaproteobacteria	Betaproteobacteriales	Burkholderiaceae	Parasutterella	NA			0.643896	0.91217	0.281236	0.773839	0.198008	0.605574
ASV_289	Bacteria	Bacteroidetes	Bacteroidia	Bacteroidales	Muribaculaceae	NA	NA	0.924519	0.966218	0.21186	0.572628	0.739984	0.833019	0.144519	0.533747	0.313555	0.662403
ASV_290	Eukaryota	NA	NA	NA	NA	NA	NA
ASV_291	Bacteria	Actinobacteria	Actinobacteria	Micrococcales	Microbacteriaceae	Leifsonia	NA
ASV_292	Bacteria	Bacteroidetes	Bacteroidia	Bacteroidales	Muribaculaceae	NA	NA			0.532763	0.890449	0.280995	0.773839	0.27041	0.640083	0.146692	0.534961
ASV_293	Eukaryota	NA	NA	NA	NA	NA	NA
ASV_294	Bacteria	Firmicutes	Clostridia	Clostridiales	Ruminococcaceae	Ruminococcaceae_UCG-010	NA	0.34982	0.632834					0.015719	0.3102	0.0189511	0.438173
ASV_295	Bacteria	Firmicutes	Clostridia	Clostridiales	Lachnospiraceae	Lachnospiraceae_UCG-001	NA	0.270652	0.632834	0.938105	0.991211	0.0555697	0.773839	0.00730755	0.239334	0.154959	0.536282
ASV_296	Bacteria	Firmicutes	Clostridia	Clostridiales	Lachnospiraceae	Lachnoclostridium	NA					0.813997	0.882209	0.888851	0.964328	0.528679	0.784189
ASV_297	Bacteria	Proteobacteria	Gammaproteobacteria	Pasteurellales	Pasteurellaceae	Muribacter	NA	0.323261	0.632834
ASV_298	Bacteria	Firmicutes	Clostridia	Clostridiales	Ruminococcaceae	Ruminococcaceae_UCG-014	NA	0.261911	0.632834	0.173975	0.534204	0.743929	0.835844	0.751456	0.90082
ASV_299	Bacteria	Firmicutes	Erysipelotrichia	Erysipelotrichales	Erysipelotrichaceae	Turicibacter	NA			0.659531	0.91217	0.528625	0.773839	0.127299	0.510774
ASV_300	Bacteria	Firmicutes	Clostridia	Clostridiales	Ruminococcaceae	Ruminiclostridium	NA	0.209657	0.632834	0.0903552	0.459184	0.0622627	0.773839	0.828625	0.939906	0.497529	0.779114
ASV_301	Bacteria	Firmicutes	Clostridia	Clostridiales	Lachnospiraceae	Lachnospiraceae_NK4A136_group	NA	0.677948	0.782745	0.567361	0.909702			0.0636294	0.399368	0.114778	0.534961
ASV_302	Bacteria	Bacteroidetes	Bacteroidia	Bacteroidales	Bacteroidaceae	Bacteroides	NA	0.17891	0.632834			0.441506	0.773839	0.0468757	0.370455	0.0457963	0.489745
ASV_303	Bacteria	Firmicutes	Clostridia	Clostridiales	Lachnospiraceae	Lachnospiraceae_NK4A136_group	NA							0.329851	0.689981	0.346262	0.697231
ASV_304	Bacteria	Firmicutes	Clostridia	Clostridiales	Ruminococcaceae	Oscillibacter	NA	0.429888	0.632834			0.218308	0.773839	0.38042	0.729469	0.224771	0.585985
ASV_305	Bacteria	Firmicutes	Clostridia	Clostridiales	Lachnospiraceae	NA	NA	0.39473	0.632834					0.72536	0.897504	0.254558	0.599921
ASV_306	Bacteria	Firmicutes	Clostridia	Clostridiales	Lachnospiraceae	NA	NA	0.309285	0.632834	0.4745	0.840593	0.430254	0.773839	0.903227	0.968029	0.709671	0.886793
ASV_307	Bacteria	Firmicutes	Clostridia	Clostridiales	Ruminococcaceae	Ruminiclostridium_9	NA					0.200518	0.773839	0.0501464	0.37742	0.262594	0.609534
ASV_308	Bacteria	Bacteroidetes	Bacteroidia	Bacteroidales	Marinifilaceae	Odoribacter	NA							0.00108979	0.121357	0.0245999	0.456701
ASV_309	Bacteria	Firmicutes	Clostridia	Clostridiales	Lachnospiraceae	NA	NA	0.479339	0.632834					0.517673	0.806838	0.780439	0.918943
ASV_310	Bacteria	Firmicutes	Clostridia	Clostridiales	Lachnospiraceae	NA	NA	0.276603	0.632834			0.321762	0.773839	0.532687	0.808555	0.965311	0.988894
ASV_311	Bacteria	Firmicutes	Clostridia	Clostridiales	Lachnospiraceae	Lachnospiraceae_NK4A136_group	NA	0.994311	0.994311			0.583022	0.773839	0.0750479	0.416409	0.365223	0.721116
ASV_312	Bacteria	Firmicutes	Clostridia	Clostridiales	Lachnospiraceae	Lachnospiraceae_NK4A136_group	NA							0.595506	0.854116	0.347245	0.697231
ASV_313	Bacteria	Firmicutes	Clostridia	Clostridiales	Lachnospiraceae	A2	NA	0.753694	0.836178	0.327921	0.694779	0.468682	0.773839	0.997628	0.999409	0.638983	0.869063
ASV_314	Bacteria	Firmicutes	Clostridia	Clostridiales	Lachnospiraceae	NA	NA	0.609782	0.727255			0.604031	0.773839	0.239021	0.62943	0.798799	0.922198
ASV_315	Bacteria	Bacteroidetes	Bacteroidia	Bacteroidales	Muribaculaceae	NA	NA	0.312774	0.632834			0.350918	0.773839			0.308401	0.658875
ASV_316	Bacteria	Bacteroidetes	Bacteroidia	Bacteroidales	Muribaculaceae	NA	NA			0.549991	0.897054	0.757211	0.845394	0.233123	0.62943	0.314273	0.662403
ASV_317	Bacteria	Firmicutes	Clostridia	Clostridiales	Lachnospiraceae	Lachnospiraceae_UCG-006	NA			0.994767	0.994767	0.504477	0.773839	0.394578	0.74481	0.905499	0.967641
ASV_318	Bacteria	Firmicutes	Clostridia	Clostridiales	Lachnospiraceae	Lachnospiraceae_NK4A136_group	NA					0.397253	0.773839	0.448609	0.76201	0.167057	0.536282
ASV_319	Bacteria	Bacteroidetes	Bacteroidia	Bacteroidales	Muribaculaceae	NA	NA	0.483794	0.632834	0.8251	0.965084	0.269331	0.773839	0.820214	0.933679	0.666325	0.874776
ASV_320	Bacteria	Bacteroidetes	Bacteroidia	Bacteroidales	Muribaculaceae	NA	NA					0.39343	0.773839			0.468181	0.775616
ASV_321	Bacteria	Firmicutes	Clostridia	Clostridiales	Ruminococcaceae	Ruminiclostridium_9	NA	0.647785	0.76028	0.594501	0.91217	0.682941	0.809813	0.616335	0.866896	0.255029	0.599921
ASV_322	Bacteria	Firmicutes	Clostridia	Clostridiales	Lachnospiraceae	Lachnospiraceae_UCG-006	NA	0.187401	0.632834	0.621766	0.91217	0.909724	0.947154	0.174918	0.575311	0.0834394	0.517595
ASV_323	Eukaryota	NA	NA	NA	NA	NA	NA
ASV_324	Bacteria	Firmicutes	Clostridia	Clostridiales	Lachnospiraceae	Roseburia	NA					0.293438	0.773839	0.0583213	0.399368	0.11244	0.534961
ASV_325	Bacteria	Bacteroidetes	Bacteroidia	Bacteroidales	Muribaculaceae	NA	NA	0.132493	0.632834	0.117155	0.468113	0.0380481	0.773839	0.0326936	0.34135	0.0388188	0.489745
ASV_326	Bacteria	Firmicutes	Clostridia	Clostridiales	Lachnospiraceae	Lachnospiraceae_NK4A136_group	NA	0.305016	0.632834	0.102322	0.459184	0.421309	0.773839	0.0794745	0.424638	0.0116042	0.383534
ASV_327	Bacteria	Firmicutes	Clostridia	Clostridiales	Lachnospiraceae	NA	NA			0.654645	0.91217			0.767272	0.914137	0.338092	0.689745
ASV_328	Bacteria	Firmicutes	Clostridia	Clostridiales	Peptococcaceae	NA	NA	0.429888	0.632834	0.855246	0.967779	0.950925	0.974363	0.246557	0.62943	0.212394	0.577516
ASV_329	Bacteria	Firmicutes	Clostridia	Clostridiales	Family_XIII	NA	NA	0.972626	0.984769					0.411261	0.75775	0.143347	0.534961
ASV_330	Bacteria	Firmicutes	Clostridia	Clostridiales	Lachnospiraceae	Tyzzerella	NA	0.931931	0.972711			0.197778	0.773839	0.605612	0.861316	0.182271	0.554075
ASV_331	Bacteria	Bacteroidetes	Bacteroidia	Bacteroidales	Muribaculaceae	NA	NA			0.540176	0.893368	0.280972	0.773839	0.245781	0.62943	0.158837	0.536282
ASV_332	Bacteria	Firmicutes	Clostridia	Clostridiales	Lachnospiraceae	NA	NA	0.308794	0.632834	0.11777	0.468113			0.536013	0.808555	0.709427	0.886793
ASV_333	Eukaryota	NA	NA	NA	NA	NA	NA
ASV_334	Bacteria	Bacteroidetes	Bacteroidia	Bacteroidales	Muribaculaceae	NA	NA	0.393177	0.632834
ASV_335	Bacteria	Firmicutes	Clostridia	Clostridiales	Lachnospiraceae	NA	NA	0.111442	0.632834	0.0925057	0.459184	0.050025	0.773839	0.0209193	0.333743	0.275695	0.613443
ASV_336	Bacteria	Actinobacteria	Coriobacteriia	Coriobacteriales	Eggerthellaceae	NA	NA	0.115895	0.632834	0.652729	0.91217	0.178763	0.773839	0.536382	0.808555	0.147404	0.534961
ASV_337	Bacteria	Bacteroidetes	Bacteroidia	Bacteroidales	Muribaculaceae	NA	NA					0.393696	0.773839			0.481618	0.779114
ASV_338	Bacteria	Bacteroidetes	Bacteroidia	Bacteroidales	Muribaculaceae	NA	NA	0.629814	0.742491	0.408634	0.774282	0.549399	0.773839	0.988769	0.999409	0.557214	0.806745
ASV_339	Eukaryota	NA	NA	NA	NA	NA	NA
ASV_340	Bacteria	Firmicutes	Bacilli	Lactobacillales	Lactobacillaceae	Lactobacillus	NA			0.647765	0.91217	0.184578	0.773839	0.0438137	0.357505	0.0829526	0.517595
ASV_341	Bacteria	Bacteroidetes	Bacteroidia	Bacteroidales	Muribaculaceae	NA	NA			0.590673	0.91217	0.280643	0.773839	0.270847	0.640083	0.238511	0.585985
ASV_342	Bacteria	Firmicutes	Clostridia	Clostridiales	Ruminococcaceae	Ruminiclostridium_9	NA	0.438206	0.632834	0.674967	0.91217	0.159559	0.773839	0.00307972	0.173897	0.415112	0.760886
ASV_343	Bacteria	Patescibacteria	Saccharimonadia	Saccharimonadales	Saccharimonadaceae	Candidatus_Saccharimonas	NA			0.108896	0.459184	0.340647	0.773839	0.0518883	0.37742	0.0500188	0.489745
ASV_344	Bacteria	Firmicutes	Clostridia	Clostridiales	Lachnospiraceae	NA	NA	0.431378	0.632834			0.403515	0.773839	0.000654515	0.105922	0.0188089	0.438173
ASV_345	Eukaryota	NA	NA	NA	NA	NA	NA
ASV_346	Bacteria	Firmicutes	Clostridia	Clostridiales	Ruminococcaceae	Ruminococcus_1	NA	0.972626	0.984769	0.339024	0.697211	0.437093	0.773839	0.717773	0.897504	0.360795	0.718764
ASV_347	Bacteria	Firmicutes	Clostridia	Clostridiales	Lachnospiraceae	Lachnospiraceae_NK4A136_group	NA	0.394656	0.632834
ASV_348	Bacteria	Firmicutes	Clostridia	Clostridiales	Lachnospiraceae	Roseburia	NA	0.308352	0.632834	0.060581	0.459184	0.386386	0.773839	0.473168	0.770883	0.695125	0.882497
ASV_349	Bacteria	Firmicutes	Clostridia	Clostridiales	Lachnospiraceae	Lachnospiraceae_UCG-001	NA	0.406747	0.632834			0.29491	0.773839	0.726002	0.897504	0.897045	0.963993
ASV_350	Bacteria	Firmicutes	Clostridia	Clostridiales	Lachnospiraceae	ASF356	NA	0.311127	0.632834	0.197879	0.559555	0.111592	0.773839	0.0236988	0.333743	0.0184297	0.438173
ASV_351	Bacteria	Patescibacteria	Saccharimonadia	Saccharimonadales	Saccharimonadaceae	Candidatus_Saccharimonas	NA			0.530205	0.890449	0.424381	0.773839	0.433587	0.761995	0.40402	0.747064
ASV_352	Bacteria	Firmicutes	Clostridia	Clostridiales	Lachnospiraceae	Lachnospiraceae_NK4A136_group	NA			0.654961	0.91217	0.490603	0.773839	0.290487	0.650584	0.23263	0.585985
ASV_353	Bacteria	Firmicutes	Clostridia	Clostridiales	Lachnospiraceae	NA	NA	0.309831	0.632834					0.664357	0.881271	0.713728	0.886793
ASV_354	Bacteria	Firmicutes	Clostridia	Clostridiales	Ruminococcaceae	Ruminiclostridium_9	NA	0.204215	0.632834					0.269373	0.640083
ASV_355	Eukaryota	NA	NA	NA	NA	NA	NA
ASV_356	Eukaryota	NA	NA	NA	NA	NA	NA
ASV_357	Bacteria	Actinobacteria	Actinobacteria	Corynebacteriales	Corynebacteriaceae	Turicella	NA	0.298973	0.632834
ASV_358	Bacteria	Firmicutes	Clostridia	Clostridiales	Ruminococcaceae	Ruminiclostridium	NA	0.41768	0.632834	0.137572	0.494109	0.382113	0.773839	0.137546	0.530512	0.082252	0.517595
ASV_359	Bacteria	Firmicutes	Clostridia	Clostridiales	Ruminococcaceae	DTU089	NA			0.20595	0.56309	0.40979	0.773839	0.448194	0.76201	0.443277	0.767515
ASV_360	Bacteria	Bacteroidetes	Bacteroidia	Bacteroidales	Rikenellaceae	Alistipes	timonensis	0.132493	0.632834			0.926785	0.956747	0.0309511	0.333743	0.0648954	0.489745
ASV_361	Bacteria	Firmicutes	Clostridia	Clostridiales	Lachnospiraceae	NA	NA	0.158457	0.632834	0.96977	0.991211	0.72115	0.824576	0.739126	0.899426	0.487012	0.779114
ASV_362	Bacteria	Firmicutes	Clostridia	Clostridiales	Lachnospiraceae	A2	NA	0.577708	0.698243	0.315648	0.684869	0.319036	0.773839	0.806366	0.928577	0.948618	0.988894
ASV_363	Bacteria	Proteobacteria	Deltaproteobacteria	Desulfovibrionales	Desulfovibrionaceae	Desulfovibrio	NA	0.344447	0.632834			0.402725	0.773839
ASV_364	Bacteria	Firmicutes	Clostridia	Clostridiales	Lachnospiraceae	Lachnospiraceae_UCG-006	NA	0.398941	0.632834			0.124017	0.773839	0.0368991	0.342131	0.0867486	0.521174
ASV_365	Eukaryota	NA	NA	NA	NA	NA	NA
ASV_366	Bacteria	Firmicutes	Clostridia	Clostridiales	Lachnospiraceae	NA	NA	0.35658	0.632834	0.0938685	0.459184	0.227007	0.773839	0.750104	0.90082	0.857802	0.953892
ASV_367	Eukaryota	NA	NA	NA	NA	NA	NA
ASV_368	Bacteria	Firmicutes	Clostridia	Clostridiales	Lachnospiraceae	Lachnospiraceae_UCG-001	NA	0.868299	0.925349	0.886909	0.987077	0.435528	0.773839	0.111092	0.482001	0.186603	0.560855
ASV_369	Bacteria	Actinobacteria	Actinobacteria	Micrococcales	Microbacteriaceae	Microbacterium	NA			0.113558	0.459184
ASV_370	Bacteria	Firmicutes	Clostridia	Clostridiales	Lachnospiraceae	Roseburia	NA			0.910305	0.991211	0.408179	0.773839	0.1401	0.531395	0.518205	0.779247
ASV_371	Bacteria	Firmicutes	Clostridia	Clostridiales	Lachnospiraceae	NA	NA	0.174278	0.632834	0.773835	0.939674	0.589443	0.773839	0.481145	0.779953	0.15291	0.536282
ASV_372	Bacteria	Firmicutes	Erysipelotrichia	Erysipelotrichales	Erysipelotrichaceae	Dubosiella	NA	0.396059	0.632834
ASV_373	Eukaryota	NA	NA	NA	NA	NA	NA
ASV_374	Bacteria	Tenericutes	Mollicutes	Anaeroplasmatales	Anaeroplasmataceae	Anaeroplasma	NA	0.310442	0.632834			0.321762	0.773839	0.063337	0.399368	0.0626506	0.489745
ASV_375	Bacteria	Firmicutes	Clostridia	Clostridiales	Lachnospiraceae	NA	NA	0.307952	0.632834	0.980733	0.991211			0.624184	0.868078	0.48758	0.779114
ASV_376	Eukaryota	NA	NA	NA	NA	NA	NA
ASV_377	Bacteria	Firmicutes	Clostridia	Clostridiales	Lachnospiraceae	NA	NA	0.483794	0.632834	0.532721	0.890449	0.512504	0.773839	0.06411	0.399368	0.0682845	0.489745
ASV_378	Bacteria	Bacteroidetes	Bacteroidia	Bacteroidales	Muribaculaceae	NA	NA					0.401315	0.773839			0.256323	0.599921
ASV_379	Bacteria	Firmicutes	Clostridia	Clostridiales	Ruminococcaceae	Ruminiclostridium_5	NA	0.951032	0.984769	0.68548	0.914856	0.569564	0.773839	0.084935	0.42761	0.79461	0.922198
ASV_380	Bacteria	Bacteroidetes	Bacteroidia	Bacteroidales	Muribaculaceae	NA	NA					0.286404	0.773839
ASV_381	Eukaryota	NA	NA	NA	NA	NA	NA
ASV_382	Bacteria	Firmicutes	Clostridia	Clostridiales	Lachnospiraceae	Lachnoclostridium	NA			0.290939	0.659396	0.00747938	0.603179	0.00124193	0.121357
ASV_383	Bacteria	Bacteroidetes	Bacteroidia	Chitinophagales	Chitinophagaceae	Vibrionimonas	NA	0.322588	0.632834
ASV_384	Bacteria	Firmicutes	Clostridia	Clostridiales	Lachnospiraceae	A2	NA	0.130494	0.632834	0.750163	0.939674	0.566961	0.773839	0.953774	0.98044	0.857836	0.953892
ASV_385	Bacteria	Firmicutes	Clostridia	Clostridiales	Lachnospiraceae	Lachnospiraceae_UCG-001	NA	0.132493	0.632834	0.372544	0.743515	0.456299	0.773839	0.231498	0.62943	0.143082	0.534961
ASV_386	Bacteria	Firmicutes	Clostridia	Clostridiales	Lachnospiraceae	Lachnospiraceae_NK4A136_group	NA							0.107107	0.482001	0.129087	0.534961
ASV_387	Bacteria	Firmicutes	Clostridia	Clostridiales	Lachnospiraceae	Lachnospiraceae_NK4A136_group	bacterium					0.293339	0.773839	0.00301637	0.173897	0.0137287	0.402885
ASV_388	Bacteria	Bacteroidetes	Bacteroidia	Bacteroidales	Muribaculaceae	NA	NA					0.738416	0.832864	0.0589153	0.399368	0.058056	0.489745
ASV_389	Bacteria	Firmicutes	Clostridia	Clostridiales	Lachnospiraceae	GCA-900066575	NA	0.195832	0.632834	0.0786562	0.459184			0.42987	0.761995	0.45826	0.77016
ASV_390	Eukaryota	NA	NA	NA	NA	NA	NA
ASV_391	Bacteria	Firmicutes	Clostridia	Clostridiales	Lachnospiraceae	Lachnospiraceae_NK4A136_group	NA	0.310442	0.632834	0.0906507	0.459184			0.434032	0.761995	0.374739	0.723913
ASV_392	Bacteria	Firmicutes	Clostridia	Clostridiales	Lachnospiraceae	Lachnoclostridium	NA	0.132493	0.632834	0.412514	0.774282	3.76138e-05	0.0218913	0.0221889	0.333743
ASV_393	Bacteria	Firmicutes	Clostridia	Clostridiales	Lachnospiraceae	NA	NA	0.199162	0.632834	0.0663244	0.459184			0.352909	0.718395	0.674139	0.874776
ASV_394	Eukaryota	NA	NA	NA	NA	NA	NA
ASV_395	Bacteria	Firmicutes	Clostridia	Clostridiales	Lachnospiraceae	Lachnoclostridium	NA
ASV_396	Bacteria	Firmicutes	Clostridia	Clostridiales	Lachnospiraceae	NA	NA							0.109195	0.482001	0.648033	0.871853
ASV_397	Eukaryota	NA	NA	NA	NA	NA	NA
ASV_398	Eukaryota	NA	NA	NA	NA	NA	NA
ASV_399	Bacteria	Tenericutes	Mollicutes	Mollicutes_RF39	NA	NA	NA			0.674967	0.91217			0.0795922	0.424638
ASV_400	Bacteria	Firmicutes	Bacilli	Lactobacillales	Lactobacillaceae	Lactobacillus	NA	0.403425	0.632834			0.443944	0.773839
ASV_401	Bacteria	Bacteroidetes	Bacteroidia	Bacteroidales	Muribaculaceae	NA	NA			0.593772	0.91217	0.716189	0.824576	0.109267	0.482001	0.15949	0.536282
ASV_402	Bacteria	Firmicutes	Bacilli	Lactobacillales	Lactobacillaceae	Lactobacillus	NA
ASV_403	Bacteria	Firmicutes	Clostridia	Clostridiales	Clostridiales_vadinBB60_group	NA	NA	0.429888	0.632834	0.282002	0.653857	0.269209	0.773839	0.372116	0.729469	0.0537968	0.489745
ASV_404	Bacteria	Firmicutes	Clostridia	Clostridiales	Lachnospiraceae	NA	NA	0.311127	0.632834	0.0762796	0.459184	0.0969792	0.773839	0.760384	0.908158	0.369139	0.722187
ASV_405	Bacteria	Bacteroidetes	Bacteroidia	Bacteroidales	Muribaculaceae	NA	NA	0.399847	0.632834
ASV_406	Bacteria	Firmicutes	Clostridia	Clostridiales	Ruminococcaceae	Ruminiclostridium_9	NA	0.400258	0.632834
ASV_407	Bacteria	Firmicutes	Clostridia	Clostridiales	Lachnospiraceae	NA	NA	0.317761	0.632834	0.292062	0.659396	0.0853611	0.773839	0.250178	0.62943	0.0317055	0.489745
ASV_408	Bacteria	Proteobacteria	Alphaproteobacteria	Rhizobiales	Xanthobacteraceae	Bradyrhizobium	NA	0.298115	0.632834
ASV_409	Bacteria	Firmicutes	Clostridia	Clostridiales	Lachnospiraceae	NA	NA	0.272508	0.632834			0.363277	0.773839	0.058941	0.399368	0.21025	0.577516
ASV_410	Bacteria	Proteobacteria	Alphaproteobacteria	Rhizobiales	Beijerinckiaceae	Methylobacterium	NA	0.711489	0.809281	0.168778	0.532212
ASV_411	Bacteria	Firmicutes	Clostridia	Clostridiales	Lachnospiraceae	Lachnospiraceae_UCG-001	NA	0.153023	0.632834			0.421344	0.773839	0.587	0.849444	0.136125	0.534961
ASV_412	Bacteria	Firmicutes	Clostridia	Clostridiales	Ruminococcaceae	Ruminiclostridium_9	NA	0.273326	0.632834					0.241091	0.62943	0.5182	0.779247
ASV_413	Bacteria	Firmicutes	Clostridia	Clostridiales	Ruminococcaceae	Ruminiclostridium_9	NA	0.18329	0.632834					0.154457	0.538683	0.534808	0.786316
ASV_414	Bacteria	Firmicutes	Clostridia	Clostridiales	Lachnospiraceae	Lachnospiraceae_NK4A136_group	NA	0.360464	0.632834					0.050683	0.37742	0.412797	0.75895
ASV_415	Bacteria	Bacteroidetes	Bacteroidia	Bacteroidales	Muribaculaceae	NA	NA	0.402445	0.632834
ASV_416	Bacteria	Firmicutes	Clostridia	Clostridiales	Lachnospiraceae	NA	NA					0.490603	0.773839	0.286369	0.650584	0.157984	0.536282
ASV_417	Bacteria	Firmicutes	Bacilli	Lactobacillales	Streptococcaceae	Lactococcus	lactis	0.38594	0.632834
ASV_418	Bacteria	Bacteroidetes	Bacteroidia	Bacteroidales	Muribaculaceae	NA	NA	0.268571	0.632834
ASV_419	Bacteria	Actinobacteria	Coriobacteriia	Coriobacteriales	Atopobiaceae	Olsenella	NA	0.29159	0.632834
ASV_420	Bacteria	Firmicutes	Clostridia	Clostridiales	Ruminococcaceae	NA	NA	0.594259	0.711882			0.394924	0.773839	0.149229	0.533747	0.207455	0.577516
ASV_421	Bacteria	Firmicutes	Clostridia	Clostridiales	Ruminococcaceae	Ruminococcaceae_UCG-009	NA					0.38849	0.773839	0.288476	0.650584	0.108043	0.534961
ASV_422	Bacteria	Proteobacteria	Gammaproteobacteria	Pasteurellales	Pasteurellaceae	Muribacter	NA	0.322304	0.632834
ASV_423	Bacteria	Bacteroidetes	Bacteroidia	Chitinophagales	Chitinophagaceae	Vibrionimonas	NA	0.385942	0.632834
ASV_424	Bacteria	Bacteroidetes	Bacteroidia	Bacteroidales	Rikenellaceae	Alistipes	NA			0.818283	0.962806			0.849854	0.947034	0.916435	0.973406
ASV_425	Bacteria	Bacteroidetes	Bacteroidia	Bacteroidales	Rikenellaceae	Rikenellaceae_RC9_gut_group	NA			0.0996047	0.459184			0.0515303	0.37742	0.0180899	0.438173
ASV_426	Bacteria	Firmicutes	Clostridia	Clostridiales	Lachnospiraceae	Lachnoclostridium	NA	0.33585	0.632834			0.255019	0.773839	0.316468	0.679038	0.768248	0.918943
ASV_427	Bacteria	Firmicutes	Clostridia	Clostridiales	Lachnospiraceae	NA	NA					0.465652	0.773839	0.28823	0.650584
ASV_428	Bacteria	Firmicutes	Clostridia	Clostridiales	Lachnospiraceae	GCA-900066575	NA	0.167111	0.632834			0.437093	0.773839	0.959131	0.982401	0.160689	0.536282
ASV_429	Bacteria	Firmicutes	Clostridia	Clostridiales	Lachnospiraceae	NA	NA	0.577708	0.698243	0.0794608	0.459184	0.616563	0.776112	0.00388534	0.179934	0.0111889	0.383534
ASV_430	Bacteria	Bacteroidetes	Bacteroidia	Bacteroidales	Muribaculaceae	NA	NA	0.410112	0.632834
ASV_431	Eukaryota	NA	NA	NA	NA	NA	NA
ASV_432	Bacteria	Firmicutes	Clostridia	Clostridiales	Lachnospiraceae	NA	NA			0.108101	0.459184	0.593755	0.773839	0.294034	0.653333	0.378957	0.726498
ASV_433	Bacteria	Firmicutes	Clostridia	Clostridiales	Lachnospiraceae	NA	NA	0.437125	0.632834			0.398542	0.773839	0.740553	0.899426
ASV_434	Bacteria	Firmicutes	Clostridia	Clostridiales	Lachnospiraceae	NA	NA	0.321683	0.632834			0.698347	0.81614	0.633497	0.872519	0.350298	0.700706
ASV_435	Bacteria	Bacteroidetes	Bacteroidia	Bacteroidales	Tannerellaceae	Parabacteroides	NA	0.141747	0.632834			0.530537	0.773839	0.151594	0.53476	0.131656	0.534961
ASV_436	Bacteria	Bacteroidetes	Bacteroidia	Bacteroidales	Muribaculaceae	NA	NA	0.402072	0.632834
ASV_437	Bacteria	Firmicutes	Clostridia	Clostridiales	Lachnospiraceae	NA	NA	0.33585	0.632834	0.387775	0.757924	0.246795	0.773839	0.24065	0.62943	0.560606	0.807412
ASV_438	Bacteria	Bacteroidetes	Bacteroidia	Bacteroidales	Muribaculaceae	NA	NA	0.402072	0.632834
ASV_439	Bacteria	Patescibacteria	Saccharimonadia	Saccharimonadales	Saccharimonadaceae	Candidatus_Saccharimonas	NA			0.110349	0.459184	0.448194	0.773839	0.283829	0.649996	0.201672	0.571172
ASV_440	Bacteria	Bacteroidetes	Bacteroidia	Bacteroidales	Rikenellaceae	Rikenellaceae_RC9_gut_group	NA							0.334486	0.693987	0.0656707	0.489745
ASV_441	Bacteria	Firmicutes	Clostridia	Clostridiales	Clostridiales_vadinBB60_group	NA	NA			0.172359	0.534204	0.558375	0.773839	0.276456	0.646542	0.32484	0.673462
ASV_442	Bacteria	Proteobacteria	Alphaproteobacteria	Sphingomonadales	Sphingomonadaceae	Sphingomonas	NA	0.421941	0.632834
ASV_443	Bacteria	Bacteroidetes	Bacteroidia	Bacteroidales	Marinifilaceae	Odoribacter	NA							0.0995083	0.47133	0.100448	0.534961
ASV_444	Bacteria	Firmicutes	Clostridia	Clostridiales	Lachnospiraceae	NA	NA	0.483794	0.632834	0.0762796	0.459184	0.321762	0.773839	0.0850191	0.42761	0.0747613	0.504804
ASV_445	Bacteria	Firmicutes	Clostridia	Clostridiales	Lachnospiraceae	NA	NA	0.346404	0.632834			0.543063	0.773839	0.896583	0.967313	0.487741	0.779114
ASV_446	Bacteria	Firmicutes	Clostridia	Clostridiales	Lachnospiraceae	Lachnospiraceae_NK4A136_group	NA	0.33585	0.632834			0.38396	0.773839	0.0608443	0.399368	0.201616	0.571172
ASV_447	Bacteria	Firmicutes	Clostridia	Clostridiales	Ruminococcaceae	Ruminiclostridium_9	NA	0.589838	0.709731			0.437093	0.773839	0.0978192	0.468498	0.117619	0.534961
ASV_448	Bacteria	Bacteroidetes	Bacteroidia	Bacteroidales	Muribaculaceae	NA	NA	0.404536	0.632834
ASV_449	Bacteria	Actinobacteria	Actinobacteria	Actinomycetales	Actinomycetaceae	Mobiluncus	NA
ASV_450	Bacteria	Actinobacteria	Coriobacteriia	Coriobacteriales	Atopobiaceae	Coriobacteriaceae_UCG-003	NA			0.307519	0.673409	0.554011	0.773839	0.525964	0.808555	0.629755	0.858522
ASV_451	Bacteria	Bacteroidetes	Bacteroidia	Chitinophagales	Chitinophagaceae	Vibrionimonas	NA	0.919222	0.963164
ASV_452	Bacteria	Firmicutes	Clostridia	Clostridiales	Ruminococcaceae	Ruminiclostridium	NA							0.435468	0.761995	0.449091	0.767515
ASV_453	Bacteria	Actinobacteria	Coriobacteriia	Coriobacteriales	Eggerthellaceae	Enterorhabdus	NA			0.83536	0.965094	0.319502	0.773839	0.637953	0.873106	0.136062	0.534961
ASV_454	Bacteria	Firmicutes	Clostridia	Clostridiales	Lachnospiraceae	NA	NA			0.0784849	0.459184	0.469848	0.773839	0.0507348	0.37742	0.13762	0.534961
ASV_455	Bacteria	Actinobacteria	Actinobacteria	Actinomycetales	Actinomycetaceae	Actinomyces	NA
ASV_456	Bacteria	Firmicutes	Clostridia	Clostridiales	Lachnospiraceae	NA	NA	0.311899	0.632834					0.241256	0.62943	0.110171	0.534961
ASV_457	Bacteria	Firmicutes	Clostridia	Clostridiales	Lachnospiraceae	Lachnospiraceae_NK4A136_group	NA	0.304673	0.632834			0.398542	0.773839	0.00754449	0.239334	0.23878	0.585985
ASV_458	Bacteria	Bacteroidetes	Bacteroidia	Bacteroidales	Muribaculaceae	NA	NA			0.112978	0.459184	0.449096	0.773839	0.549224	0.813662	0.454921	0.769103
ASV_459	Bacteria	Firmicutes	Clostridia	Clostridiales	Lachnospiraceae	Lachnospiraceae_NK4A136_group	NA	0.147721	0.632834					0.14767	0.533747	0.255398	0.599921
ASV_460	Bacteria	Proteobacteria	Alphaproteobacteria	Rhizobiales	Xanthobacteraceae	Afipia	NA	0.321838	0.632834
ASV_461	Bacteria	Firmicutes	Bacilli	Lactobacillales	Lactobacillaceae	Lactobacillus	NA			0.665001	0.91217	0.154395	0.773839
ASV_462	Bacteria	Firmicutes	Clostridia	Clostridiales	Lachnospiraceae	Lachnospiraceae_NK4A136_group	NA	0.412709	0.632834
ASV_463	Bacteria	Firmicutes	Clostridia	Clostridiales	Ruminococcaceae	Ruminiclostridium_9	NA	0.331105	0.632834					0.803332	0.928577	0.168456	0.536282
ASV_464	Eukaryota	NA	NA	NA	NA	NA	NA
ASV_465	Bacteria	Firmicutes	Clostridia	Clostridiales	Lachnospiraceae	Lachnospiraceae_NK4A136_group	NA	0.304779	0.632834	0.175056	0.534204			0.112985	0.483976	0.367646	0.721116
ASV_466	Bacteria	Proteobacteria	Gammaproteobacteria	Pasteurellales	Pasteurellaceae	Rodentibacter	NA	0.412884	0.632834
ASV_467	Bacteria	Firmicutes	Clostridia	Clostridiales	Lachnospiraceae	Lachnospiraceae_NK4A136_group	NA							0.532262	0.808555	0.643324	0.870312
ASV_468	Bacteria	Firmicutes	Clostridia	Clostridiales	Ruminococcaceae	NA	NA	0.992829	0.994055					0.724168	0.897504	0.704243	0.886793
ASV_469	Bacteria	Firmicutes	Clostridia	Clostridiales	Lachnospiraceae	Lachnospiraceae_NK4A136_group	NA	0.150456	0.632834					0.202618	0.605574	0.255398	0.599921
ASV_470	Bacteria	Firmicutes	Clostridia	Clostridiales	Ruminococcaceae	Ruminiclostridium_9	NA	0.705872	0.805151			0.321762	0.773839	0.871336	0.952981	0.195183	0.570591
ASV_471	Bacteria	Bacteroidetes	Bacteroidia	Bacteroidales	Bacteroidaceae	Bacteroides	vulgatus	0.132493	0.632834	0.989516	0.992902			0.154781	0.538683
ASV_472	Bacteria	Firmicutes	Clostridia	Clostridiales	Lachnospiraceae	GCA-900066575	NA	0.180952	0.632834					0.99893	0.999409
ASV_473	Bacteria	Firmicutes	Bacilli	Lactobacillales	Streptococcaceae	Streptococcus	NA	0.399726	0.632834
ASV_474	Bacteria	Bacteroidetes	Bacteroidia	Bacteroidales	Muribaculaceae	NA	NA	0.321949	0.632834
ASV_475	Bacteria	Proteobacteria	Alphaproteobacteria	Rhizobiales	Labraceae	Labrys	NA	0.290782	0.632834
ASV_476	Bacteria	Actinobacteria	Coriobacteriia	Coriobacteriales	Eggerthellaceae	Denitrobacterium	NA	0.454981	0.632834	0.587264	0.91217	0.358911	0.773839	0.8073	0.928577
ASV_477	Bacteria	Firmicutes	Clostridia	Clostridiales	Ruminococcaceae	Ruminiclostridium_9	NA	0.34296	0.632834	0.13171	0.479222	0.394924	0.773839	0.643129	0.873396	0.528287	0.784189
ASV_478	Eukaryota	NA	NA	NA	NA	NA	NA
ASV_479	Bacteria	Firmicutes	Clostridia	Clostridiales	Ruminococcaceae	NA	NA	0.49536	0.635348	0.701643	0.914856	0.589443	0.773839	0.462371	0.768755	0.227292	0.585985
ASV_480	Bacteria	Firmicutes	Clostridia	Clostridiales	Ruminococcaceae	Ruminiclostridium_9	NA	0.960682	0.984769			0.99036	0.993101	0.934613	0.976428	0.345408	0.697231
ASV_481	Bacteria	Proteobacteria	Alphaproteobacteria	Rhizobiales	Xanthobacteraceae	Bradyrhizobium	NA	0.886219	0.93917
ASV_482	Bacteria	Firmicutes	Clostridia	Clostridiales	Lachnospiraceae	A2	NA			0.576183	0.91217	0.399038	0.773839	0.796078	0.923956	0.737284	0.905874
ASV_483	Bacteria	Firmicutes	Clostridia	Clostridiales	Lachnospiraceae	NA	NA	0.186236	0.632834			0.486138	0.773839	0.0464106	0.370455
ASV_484	Bacteria	Bacteroidetes	Bacteroidia	Bacteroidales	Rikenellaceae	Alistipes	NA			0.0545901	0.459184			0.774632	0.914165	0.188539	0.56183
ASV_485	Bacteria	Firmicutes	Clostridia	Clostridiales	Lachnospiraceae	Lachnospiraceae_UCG-001	NA	0.441011	0.632834			0.468798	0.773839	0.815289	0.930254	0.522102	0.78264
ASV_486	Bacteria	Firmicutes	Clostridia	Clostridiales	Lachnospiraceae	NA	NA	0.311127	0.632834	0.0954329	0.459184	0.246903	0.773839	0.382184	0.730514	0.665868	0.874776
ASV_487	Bacteria	Firmicutes	Clostridia	Clostridiales	Lachnospiraceae	Lachnoclostridium	NA					0.262365	0.773839	0.946384	0.978636	0.11463	0.534961
ASV_488	Bacteria	Firmicutes	Clostridia	Clostridiales	Lachnospiraceae	GCA-900066575	NA			0.123234	0.470685	0.33801	0.773839	0.729108	0.897504	0.238848	0.585985
ASV_489	Bacteria	Bacteroidetes	Bacteroidia	Bacteroidales	Muribaculaceae	NA	NA	0.747301	0.832501	0.946369	0.991211	0.147006	0.773839	0.26771	0.640083	0.910122	0.968512
ASV_490	Bacteria	Proteobacteria	Alphaproteobacteria	Rhizobiales	Xanthobacteraceae	Bradyrhizobium	NA	0.290657	0.632834
ASV_491	Bacteria	Proteobacteria	Gammaproteobacteria	Enterobacteriales	Enterobacteriaceae	Escherichia/Shigella	NA			0.218617	0.576833	0.484792	0.773839
ASV_492	Bacteria	Firmicutes	Clostridia	Clostridiales	Family_XIII	Family_XIII_UCG-001	NA	0.502787	0.642142			0.438498	0.773839	0.161088	0.550439	0.208561	0.577516
ASV_493	Bacteria	Firmicutes	Clostridia	Clostridiales	Lachnospiraceae	Lachnoclostridium	NA			0.403886	0.773433	0.617422	0.776112	0.302586	0.660372	0.279966	0.616549
ASV_494	Bacteria	Firmicutes	Clostridia	Clostridiales	Ruminococcaceae	Butyricicoccus	NA	0.317761	0.632834	0.872139	0.975229	0.115819	0.773839	0.145997	0.533747	0.714044	0.886793
ASV_495	Bacteria	Bacteroidetes	Bacteroidia	Bacteroidales	Muribaculaceae	NA	NA	0.348745	0.632834
ASV_496	Bacteria	Firmicutes	Clostridia	Clostridiales	Lachnospiraceae	Lachnospiraceae_FCS020_group	NA	0.189893	0.632834	0.794115	0.941394	0.405047	0.773839			0.186707	0.560855
ASV_497	Bacteria	Bacteroidetes	Bacteroidia	Bacteroidales	Muribaculaceae	NA	NA	0.898574	0.947651	0.531439	0.890449	0.751943	0.843219	0.330424	0.689981	0.775798	0.918943
ASV_498	Bacteria	Firmicutes	Clostridia	Clostridiales	Lachnospiraceae	NA	NA	0.64962	0.760747	0.381998	0.752855	0.60891	0.773839	0.776635	0.914165	0.362107	0.7195
ASV_499	Bacteria	Firmicutes	Clostridia	Clostridiales	Lachnospiraceae	Lachnoclostridium	NA	0.157685	0.632834					0.259403	0.635267
ASV_500	Bacteria	Bacteroidetes	Bacteroidia	Bacteroidales	Muribaculaceae	NA	NA					0.564344	0.773839
ASV_501	Bacteria	Firmicutes	Erysipelotrichia	Erysipelotrichales	Erysipelotrichaceae	Turicibacter	NA					0.414044	0.773839	0.639603	0.873106
ASV_502	Bacteria	Firmicutes	Clostridia	Clostridiales	Lachnospiraceae	NA	NA			0.0605281	0.459184			0.0313016	0.333743	0.880145	0.955264
ASV_503	Bacteria	Firmicutes	Clostridia	Clostridiales	Lachnospiraceae	Lachnospiraceae_UCG-006	NA			0.400269	0.769623			0.355773	0.7201	0.47301	0.77845
ASV_504	Bacteria	Firmicutes	Clostridia	Clostridiales	Lachnospiraceae	NA	NA	0.678507	0.782745	0.669231	0.91217	0.545218	0.773839	0.966037	0.986354	0.791577	0.922198
ASV_505	Bacteria	Firmicutes	Clostridia	Clostridiales	Lachnospiraceae	NA	NA			0.83421	0.965094	0.733732	0.832864	0.921526	0.970803	0.901992	0.966601
ASV_506	Bacteria	Firmicutes	Clostridia	Clostridiales	Ruminococcaceae	Ruminococcaceae_UCG-014	NA					0.422881	0.773839	0.630264	0.871775	0.770564	0.918943
ASV_507	Bacteria	Firmicutes	Clostridia	Clostridiales	Lachnospiraceae	Lachnospiraceae_UCG-001	NA							0.237599	0.62943	0.861551	0.954129
ASV_508	Bacteria	Firmicutes	Clostridia	Clostridiales	Lachnospiraceae	Lachnospiraceae_NK4A136_group	NA	0.319557	0.632834			0.469848	0.773839	0.189738	0.598167	0.0816336	0.517595
ASV_509	Bacteria	Bacteroidetes	Bacteroidia	Bacteroidales	Tannerellaceae	Parabacteroides	goldsteinii	0.268401	0.632834			0.376101	0.773839	0.0313613	0.333743	0.217723	0.581722
ASV_510	Bacteria	Firmicutes	Clostridia	Clostridiales	Lachnospiraceae	NA	NA					0.400094	0.773839	0.106671	0.482001	0.124631	0.534961
ASV_511	Bacteria	Firmicutes	Clostridia	Clostridiales	Lachnospiraceae	NA	NA			0.674967	0.91217			0.39559	0.74481	0.999909	0.999909
ASV_512	Bacteria	Firmicutes	Clostridia	Clostridiales	Ruminococcaceae	Ruminiclostridium_9	NA	0.729454	0.822792	0.0705579	0.459184	0.38849	0.773839	0.00110825	0.121357	0.132949	0.534961
ASV_513	Bacteria	Firmicutes	Clostridia	Clostridiales	Clostridiales_vadinBB60_group	NA	NA	0.988862	0.992316			0.589443	0.773839	0.0395884	0.342131	0.0125666	0.383534
ASV_514	Bacteria	Firmicutes	Clostridia	Clostridiales	Ruminococcaceae	UBA1819	NA	0.612633	0.729582					0.426983	0.761995	0.982837	0.999274
ASV_515	Bacteria	Firmicutes	Clostridia	Clostridiales	Ruminococcaceae	Oscillibacter	NA	0.274536	0.632834			0.296553	0.773839	0.279037	0.646647	0.672035	0.874776
ASV_516	Bacteria	Proteobacteria	Gammaproteobacteria	Betaproteobacteriales	Burkholderiaceae	Variovorax	NA			0.0859508	0.459184
ASV_517	Eukaryota	NA	NA	NA	NA	NA	NA
ASV_518	Bacteria	Bacteroidetes	Bacteroidia	Chitinophagales	Chitinophagaceae	Vibrionimonas	NA	0.428298	0.632834
ASV_519	Bacteria	Bacteroidetes	Bacteroidia	Bacteroidales	Muribaculaceae	NA	NA	0.401763	0.632834
ASV_520	Bacteria	Proteobacteria	Alphaproteobacteria	Rhodospirillales	NA	NA	NA									0.0662775	0.489745
ASV_521	Bacteria	Firmicutes	Clostridia	Clostridiales	Lachnospiraceae	Lachnospiraceae_UCG-001	NA					0.507915	0.773839	0.468733	0.769226	0.386341	0.731459
ASV_522	Bacteria	Firmicutes	Clostridia	Clostridiales	Lachnospiraceae	Lachnospiraceae_NK4A136_group	NA	0.170199	0.632834					0.247707	0.62943	0.177822	0.545279
ASV_523	Bacteria	Bacteroidetes	Bacteroidia	Bacteroidales	Tannerellaceae	Parabacteroides	NA
ASV_524	Bacteria	Bacteroidetes	Bacteroidia	Bacteroidales	Muribaculaceae	NA	NA	0.348177	0.632834
ASV_525	Bacteria	Actinobacteria	Coriobacteriia	Coriobacteriales	Eggerthellaceae	Denitrobacterium	NA			0.790097	0.939674	0.556666	0.773839	0.829698	0.939906
ASV_526	Bacteria	Firmicutes	Clostridia	Clostridiales	Lachnospiraceae	NA	NA	0.184598	0.632834			0.589443	0.773839	0.432166	0.761995	0.11351	0.534961
ASV_527	Bacteria	Proteobacteria	Alphaproteobacteria	Rhizobiales	Xanthobacteraceae	Bradyrhizobium	NA	0.42608	0.632834
ASV_528	Bacteria	Firmicutes	Clostridia	Clostridiales	Lachnospiraceae	NA	NA							0.148635	0.533747
ASV_529	Bacteria	Firmicutes	Clostridia	Clostridiales	Lachnospiraceae	Lachnospiraceae_UCG-001	NA							0.518589	0.806971	0.750904	0.918173
ASV_530	Bacteria	Firmicutes	Clostridia	Clostridiales	Ruminococcaceae	Ruminiclostridium_6	NA							0.80351	0.928577	0.773789	0.918943
ASV_531	Bacteria	Bacteroidetes	Bacteroidia	Bacteroidales	Bacteroidaceae	Bacteroides	vulgatus	0.155429	0.632834					0.375038	0.729469	0.123328	0.534961
ASV_532	Bacteria	Firmicutes	Clostridia	Clostridiales	Lachnospiraceae	NA	NA	0.319557	0.632834	0.00587579	0.459184	0.204025	0.773839	0.260889	0.635267	0.798916	0.922198
ASV_533	Bacteria	Proteobacteria	Gammaproteobacteria	Pasteurellales	Pasteurellaceae	Muribacter	NA	0.420941	0.632834
ASV_534	Bacteria	Bacteroidetes	Bacteroidia	Bacteroidales	Muribaculaceae	NA	NA			0.0880297	0.459184	0.0614882	0.773839	0.445422	0.76201	0.432216	0.767515
ASV_535	Bacteria	Firmicutes	Clostridia	Clostridiales	Lachnospiraceae	Lachnospiraceae_NK4A136_group	NA					0.709033	0.8238	0.902776	0.968029	0.138168	0.534961
ASV_536	Bacteria	Firmicutes	Clostridia	Clostridiales	Ruminococcaceae	NA	NA	0.319557	0.632834	0.124686	0.47181	0.627787	0.780709	0.909355	0.969371	0.425278	0.767108
ASV_537	Bacteria	Firmicutes	Clostridia	Clostridiales	Lachnospiraceae	Lachnospiraceae_NK4A136_group	NA	0.425841	0.632834					0.6229	0.86777	0.53486	0.786316
ASV_538	Bacteria	Firmicutes	Clostridia	Clostridiales	Ruminococcaceae	Ruminiclostridium_9	NA	0.33585	0.632834	0.219514	0.576833			0.0118776	0.248787	0.559792	0.807412
ASV_539	Bacteria	Actinobacteria	Actinobacteria	Corynebacteriales	Segniliparaceae	Segniliparus	NA	0.426788	0.632834
ASV_540	Bacteria	Firmicutes	Clostridia	Clostridiales	Lachnospiraceae	NA	NA					0.808849	0.878265	0.8946	0.966248	0.421395	0.765535
ASV_541	Bacteria	Firmicutes	Clostridia	Clostridiales	Ruminococcaceae	NA	NA	0.33585	0.632834					0.357408	0.7201	0.918549	0.973406
ASV_542	Bacteria	Firmicutes	Clostridia	Clostridiales	Lachnospiraceae	Roseburia	NA	0.155429	0.632834					0.748342	0.90082
ASV_543	Bacteria	Firmicutes	Clostridia	Clostridiales	Lachnospiraceae	Lachnospiraceae_NK4A136_group	NA	0.31377	0.632834	0.0671367	0.459184			0.946064	0.978636	0.497788	0.779114
ASV_544	Eukaryota	NA	NA	NA	NA	NA	NA
ASV_545	Bacteria	Firmicutes	Clostridia	Clostridiales	Lachnospiraceae	NA	NA					0.761409	0.846644	0.397839	0.74481	0.263266	0.609534
ASV_546	Bacteria	Firmicutes	Clostridia	Clostridiales	Ruminococcaceae	NA	NA	0.144812	0.632834					0.448887	0.76201	0.01228	0.383534
ASV_547	Bacteria	Proteobacteria	Alphaproteobacteria	Rhizobiales	Xanthobacteraceae	Bradyrhizobium	NA	0.382675	0.632834
ASV_548	Bacteria	Firmicutes	Clostridia	Clostridiales	Lachnospiraceae	Lachnoclostridium	NA
ASV_549	Bacteria	Firmicutes	Bacilli	Bacillales	Staphylococcaceae	Staphylococcus	NA					0.339769	0.773839
ASV_550	Bacteria	Bacteroidetes	Bacteroidia	Bacteroidales	Muribaculaceae	NA	NA	0.341906	0.632834	0.145623	0.50277	0.183661	0.773839	0.324871	0.68576	0.680327	0.878031
ASV_551	Bacteria	Firmicutes	Clostridia	Clostridiales	Lachnospiraceae	Lachnoclostridium	NA	0.115895	0.632834	0.166308	0.527943			0.577808	0.84242	0.965594	0.988894
ASV_552	Bacteria	Firmicutes	Clostridia	Clostridiales	Lachnospiraceae	NA	NA	0.180952	0.632834			0.486138	0.773839	0.844025	0.947034
ASV_553	Bacteria	Firmicutes	Clostridia	Clostridiales	Lachnospiraceae	Roseburia	NA					0.293339	0.773839	0.0259898	0.333743	0.489173	0.779114
ASV_554	Bacteria	Firmicutes	Erysipelotrichia	Erysipelotrichales	Erysipelotrichaceae	Turicibacter	NA					0.426977	0.773839	0.652159	0.87586
ASV_555	Bacteria	Firmicutes	Clostridia	Clostridiales	Lachnospiraceae	Lachnospiraceae_UCG-006	NA	0.360464	0.632834	0.200994	0.559555	0.508085	0.773839	0.405931	0.75078	0.225292	0.585985
ASV_556	Bacteria	Firmicutes	Clostridia	Clostridiales	Ruminococcaceae	Ruminiclostridium_9	NA	0.429888	0.632834	0.633468	0.91217			0.727912	0.897504	0.0062072	0.383534
ASV_557	Bacteria	Proteobacteria	Deltaproteobacteria	Desulfovibrionales	Desulfovibrionaceae	Bilophila	NA	0.182842	0.632834	0.248174	0.625768			0.214156	0.608149
ASV_558	Bacteria	Firmicutes	Clostridia	Clostridiales	Lachnospiraceae	Lachnoclostridium	NA							0.445101	0.76201	0.340719	0.693032
ASV_559	Bacteria	Firmicutes	Clostridia	Clostridiales	Ruminococcaceae	Ruminiclostridium_9	NA							0.651071	0.87561	0.29882	0.640449
ASV_560	Bacteria	Firmicutes	Clostridia	Clostridiales	Ruminococcaceae	Ruminiclostridium_9	NA			0.757725	0.939674	0.66502	0.801328	0.952699	0.98044	0.255731	0.599921
ASV_561	Bacteria	Firmicutes	Clostridia	Clostridiales	Ruminococcaceae	Ruminiclostridium_9	NA	0.305291	0.632834					0.608635	0.864012	0.273503	0.613223
ASV_562	Bacteria	Actinobacteria	Coriobacteriia	Coriobacteriales	Eggerthellaceae	Enterorhabdus	mucosicola	0.268401	0.632834	0.323854	0.690014	0.78332	0.863863	0.362127	0.720544
ASV_563	Bacteria	Firmicutes	Clostridia	Clostridiales	Ruminococcaceae	Ruminococcaceae_NK4A214_group	NA			0.0545901	0.459184	0.916811	0.951131	0.414446	0.757866	0.0894802	0.529251
ASV_564	Bacteria	Bacteroidetes	Bacteroidia	Bacteroidales	Muribaculaceae	Muribaculum	NA	0.429888	0.632834	0.0768317	0.459184	0.216657	0.773839	0.0062855	0.239334	0.0860747	0.521174
ASV_565	Bacteria	Actinobacteria	Coriobacteriia	Coriobacteriales	Eggerthellaceae	Parvibacter	caecicola			0.280013	0.653857	0.826193	0.890452	0.72928	0.897504
ASV_566	Bacteria	Firmicutes	Clostridia	Clostridiales	Lachnospiraceae	NA	NA					0.462112	0.773839	0.956207	0.98044	0.460524	0.772264
ASV_567	Bacteria	Proteobacteria	Gammaproteobacteria	Pasteurellales	Pasteurellaceae	Muribacter	NA	0.440137	0.632834
ASV_568	Bacteria	Bacteroidetes	Bacteroidia	Bacteroidales	Rikenellaceae	Rikenellaceae_RC9_gut_group	NA			0.515222	0.88297			0.954846	0.98044	0.608518	0.842649
ASV_569	Bacteria	Firmicutes	Clostridia	Clostridiales	Lachnospiraceae	NA	NA							0.644898	0.87353	0.423859	0.766362
ASV_570	Bacteria	Firmicutes	Clostridia	Clostridiales	Lachnospiraceae	ASF356	NA					0.490603	0.773839	0.436323	0.761995	0.160094	0.536282
ASV_571	Bacteria	Firmicutes	Clostridia	Clostridiales	Lachnospiraceae	Lachnospiraceae_NK4A136_group	NA	0.404918	0.632834
ASV_572	Bacteria	Firmicutes	Bacilli	Lactobacillales	Streptococcaceae	Streptococcus	NA	0.427292	0.632834
ASV_573	Bacteria	Proteobacteria	Gammaproteobacteria	Pasteurellales	Pasteurellaceae	Muribacter	NA	0.440085	0.632834
ASV_574	Bacteria	Firmicutes	Clostridia	Clostridiales	Lachnospiraceae	Lachnoclostridium	NA
ASV_575	Bacteria	Bacteroidetes	Bacteroidia	Bacteroidales	Muribaculaceae	NA	NA	0.346373	0.632834
ASV_576	Bacteria	Firmicutes	Clostridia	Clostridiales	Ruminococcaceae	Ruminiclostridium_9	NA			0.622039	0.91217	0.293113	0.773839	0.00338132	0.173897	0.146538	0.534961
ASV_577	Bacteria	Firmicutes	Clostridia	Clostridiales	Lachnospiraceae	NA	NA			0.598447	0.91217	0.564845	0.773839	0.936204	0.976428	0.672813	0.874776
ASV_578	Bacteria	Firmicutes	Clostridia	Clostridiales	Lachnospiraceae	Lachnospiraceae_NK4A136_group	NA			0.160068	0.521651					0.992979	0.999909
ASV_579	Bacteria	Firmicutes	Clostridia	Clostridiales	Lachnospiraceae	NA	NA					0.325842	0.773839	0.261682	0.635267	0.817327	0.933563
ASV_580	Bacteria	Firmicutes	Clostridia	Clostridiales	Lachnospiraceae	Lachnoclostridium	NA					0.655797	0.796814	0.319944	0.682783	0.296828	0.637972
ASV_581	Bacteria	Proteobacteria	Alphaproteobacteria	Rhizobiales	Xanthobacteraceae	Bradyrhizobium	NA	0.4315	0.632834
ASV_582	Bacteria	Firmicutes	Erysipelotrichia	Erysipelotrichales	Erysipelotrichaceae	NA	NA	0.972626	0.984769			0.411876	0.773839	0.912148	0.969371	0.536207	0.78678
ASV_583	Bacteria	Firmicutes	Clostridia	Clostridiales	Ruminococcaceae	Ruminiclostridium	NA	0.577708	0.698243	0.0721429	0.459184	0.0742334	0.773839	0.0638058	0.399368	0.0511907	0.489745
ASV_584	Bacteria	Bacteroidetes	Bacteroidia	Chitinophagales	Chitinophagaceae	Vibrionimonas	NA	0.296067	0.632834
ASV_585	Bacteria	Cyanobacteria	Oxyphotobacteria	Chloroplast	NA	NA	NA	0.321064	0.632834
ASV_586	Bacteria	Proteobacteria	Alphaproteobacteria	Rhizobiales	Xanthobacteraceae	Bradyrhizobium	NA	0.212744	0.632834
ASV_587	Bacteria	Actinobacteria	Actinobacteria	Micrococcales	Microbacteriaceae	Microbacterium	NA	0.296225	0.632834
ASV_588	Bacteria	Firmicutes	Clostridia	Clostridiales	Lachnospiraceae	NA	NA	0.747301	0.832501					0.0688916	0.405417	0.219135	0.581722
ASV_589	Bacteria	Bacteroidetes	Bacteroidia	Bacteroidales	Muribaculaceae	NA	NA	0.415985	0.632834
ASV_590	Bacteria	Bacteroidetes	Bacteroidia	Chitinophagales	Chitinophagaceae	Sediminibacterium	NA	0.293451	0.632834
ASV_591	Bacteria	Firmicutes	Clostridia	Clostridiales	Lachnospiraceae	NA	NA					0.676788	0.807152	7.73817e-05	0.0187844	0.211254	0.577516
ASV_592	Bacteria	Firmicutes	Clostridia	Clostridiales	Ruminococcaceae	Ruminiclostridium_6	NA					0.510445	0.773839	0.843002	0.947034	0.475721	0.77845
ASV_593	Bacteria	Firmicutes	Clostridia	Clostridiales	Lachnospiraceae	NA	NA	0.953216	0.984769	0.102423	0.459184			0.510812	0.803694	0.235628	0.585985
ASV_594	Bacteria	Firmicutes	Clostridia	Clostridiales	Ruminococcaceae	Ruminiclostridium_5	NA			0.893997	0.990306	0.21991	0.773839	0.289834	0.650584	0.527979	0.784189
ASV_595	Bacteria	Firmicutes	Clostridia	Clostridiales	Lachnospiraceae	ASF356	NA							0.705462	0.891932	0.422848	0.76635
ASV_596	Bacteria	Firmicutes	Clostridia	Clostridiales	Ruminococcaceae	NA	NA					0.608385	0.773839	0.037238	0.342131	0.428283	0.767515
ASV_597	Bacteria	Firmicutes	Clostridia	Clostridiales	Lachnospiraceae	Roseburia	NA	0.775071	0.855214	0.0443476	0.459184
ASV_598	Bacteria	Patescibacteria	Saccharimonadia	Saccharimonadales	Saccharimonadaceae	Candidatus_Saccharimonas	NA			0.680202	0.914022	0.466482	0.773839	0.425144	0.761995	0.464176	0.774981
ASV_599	Bacteria	Firmicutes	Clostridia	Clostridiales	Clostridiales_vadinBB60_group	NA	NA	0.144812	0.632834					0.584066	0.847724	0.761191	0.918943
ASV_600	Bacteria	Firmicutes	Bacilli	Lactobacillales	Lactobacillaceae	Lactobacillus	NA			0.174831	0.534204
ASV_601	Bacteria	Firmicutes	Clostridia	Clostridiales	Ruminococcaceae	NA	NA	0.747301	0.832501	0.0763151	0.459184	0.220645	0.773839	0.12455	0.509731	0.0556723	0.489745
ASV_602	Bacteria	Firmicutes	Erysipelotrichia	Erysipelotrichales	Erysipelotrichaceae	NA	NA	0.972626	0.984769	0.339024	0.697211			0.201741	0.605574	0.147099	0.534961
ASV_603	Bacteria	Firmicutes	Clostridia	Clostridiales	Ruminococcaceae	Ruminiclostridium	NA	0.34982	0.632834	0.969378	0.991211			0.165656	0.557046	0.325698	0.673462
ASV_604	Bacteria	Bacteroidetes	Bacteroidia	Bacteroidales	Muribaculaceae	Muribaculum	NA			0.482911	0.845988	0.437093	0.773839	0.150614	0.533747	0.186654	0.560855
ASV_605	Bacteria	Firmicutes	Clostridia	Clostridiales	Ruminococcaceae	Oscillibacter	NA	0.331105	0.632834	0.0605281	0.459184	0.410623	0.773839	0.0422334	0.357505	0.0478476	0.489745
ASV_606	Bacteria	Bacteroidetes	Bacteroidia	Bacteroidales	Muribaculaceae	NA	NA	0.415343	0.632834
ASV_607	Bacteria	Firmicutes	Clostridia	Clostridiales	Family_XIII	NA	NA			0.0723968	0.459184			0.469386	0.769226	0.808258	0.92737
ASV_608	Bacteria	Actinobacteria	Actinobacteria	Micrococcales	Microbacteriaceae	Microbacterium	NA	0.296116	0.632834
ASV_609	Bacteria	Firmicutes	Clostridia	Clostridiales	Ruminococcaceae	Oscillibacter	NA	0.33585	0.632834			0.392211	0.773839	0.312104	0.67797	0.780308	0.918943
ASV_610	Bacteria	Firmicutes	Clostridia	Clostridiales	Ruminococcaceae	Ruminiclostridium_9	NA							0.0436634	0.357505	0.463319	0.774981
ASV_611	Bacteria	Firmicutes	Clostridia	Clostridiales	Lachnospiraceae	Lachnoclostridium	NA	0.307952	0.632834	0.689569	0.914856			0.447784	0.76201
ASV_612	Bacteria	Firmicutes	Clostridia	Clostridiales	Lachnospiraceae	NA	NA			0.60049	0.91217			0.211335	0.607119	0.402349	0.74694
ASV_613	Bacteria	Firmicutes	Clostridia	Clostridiales	Lachnospiraceae	Lachnoclostridium	NA
ASV_614	Bacteria	Firmicutes	Clostridia	Clostridiales	Ruminococcaceae	Oscillibacter	NA	0.429888	0.632834					0.701617	0.891849	0.823959	0.939732
ASV_615	Bacteria	Firmicutes	Clostridia	Clostridiales	Lachnospiraceae	NA	NA							0.280135	0.647445
ASV_616	Bacteria	Firmicutes	Clostridia	Clostridiales	Ruminococcaceae	NA	NA	0.375291	0.632834					0.0269426	0.333743	0.00181661	0.258857
ASV_617	Bacteria	Proteobacteria	Gammaproteobacteria	Pasteurellales	Pasteurellaceae	Muribacter	NA	0.443744	0.632834
ASV_618	Bacteria	Firmicutes	Clostridia	Clostridiales	Lachnospiraceae	NA	NA	0.327312	0.632834	0.0721429	0.459184	0.844023	0.903775	0.736592	0.899426	0.229523	0.585985
ASV_619	Bacteria	Firmicutes	Clostridia	Clostridiales	Lachnospiraceae	A2	NA	0.147721	0.632834					0.0960394	0.464808
ASV_620	Bacteria	Firmicutes	Clostridia	Clostridiales	Ruminococcaceae	Ruminiclostridium_9	NA	0.345633	0.632834					0.511517	0.803694
ASV_621	Bacteria	Firmicutes	Clostridia	Clostridiales	Lachnospiraceae	NA	NA							0.806221	0.928577
ASV_622	Bacteria	Firmicutes	Clostridia	Clostridiales	Lachnospiraceae	NA	NA							0.0105568	0.239334	0.26556	0.609534
ASV_623	Bacteria	Firmicutes	Clostridia	Clostridiales	Lachnospiraceae	Lachnospiraceae_NK4A136_group	NA					0.434219	0.773839	0.147026	0.533747	0.865667	0.954866
ASV_624	Bacteria	Firmicutes	Clostridia	Clostridiales	Lachnospiraceae	Roseburia	NA					0.600378	0.773839	0.192036	0.601507
ASV_625	Bacteria	Firmicutes	Clostridia	Clostridiales	Family_XIII	NA	NA			0.938433	0.991211	0.583022	0.773839	0.967522	0.986832	0.895308	0.963993
ASV_626	Eukaryota	NA	NA	NA	NA	NA	NA
ASV_627	Bacteria	Firmicutes	Clostridia	Clostridiales	Ruminococcaceae	Ruminiclostridium_5	NA	0.951612	0.984769	0.651347	0.91217	0.757238	0.845394	0.989521	0.999409	0.265436	0.609534
ASV_628	Bacteria	Proteobacteria	Alphaproteobacteria	Rhodobacterales	Rhodobacteraceae	Paenirhodobacter	NA	0.345055	0.632834
ASV_629	Bacteria	Actinobacteria	Coriobacteriia	Coriobacteriales	Eggerthellaceae	Enterorhabdus	NA	0.268401	0.632834	0.930313	0.991211	0.292617	0.773839	0.55695	0.818152
ASV_630	Bacteria	Firmicutes	Clostridia	Clostridiales	Lachnospiraceae	ASF356	NA							0.471035	0.769226	0.397655	0.741837
ASV_631	Bacteria	Firmicutes	Clostridia	Clostridiales	Ruminococcaceae	Ruminococcaceae_UCG-014	NA	0.131066	0.632834			0.987461	0.993101	0.665613	0.881733	0.365289	0.721116
ASV_632	Bacteria	Firmicutes	Clostridia	Clostridiales	Lachnospiraceae	Lachnospiraceae_UCG-001	NA			0.868339	0.975229	0.443944	0.773839	0.641117	0.873106
ASV_633	Bacteria	Proteobacteria	Deltaproteobacteria	Desulfovibrionales	Desulfovibrionaceae	Bilophila	NA	0.622899	0.73863	0.454073	0.828455	0.587656	0.773839	0.732705	0.899426	0.14754	0.534961
ASV_634	Bacteria	Firmicutes	Clostridia	Clostridiales	Lachnospiraceae	Lachnospiraceae_NK4A136_group	NA							0.837284	0.942066	0.436476	0.767515
ASV_635	Bacteria	Firmicutes	Clostridia	Clostridiales	Clostridiales_vadinBB60_group	NA	NA			0.218836	0.576833			0.19402	0.601896	0.130643	0.534961
ASV_636	Bacteria	Firmicutes	Clostridia	Clostridiales	Lachnospiraceae	Roseburia	NA			0.154355	0.515202	0.600378	0.773839	0.344393	0.706989	0.437711	0.767515
ASV_637	Bacteria	Firmicutes	Clostridia	Clostridiales	Lachnospiraceae	NA	NA	0.174278	0.632834					0.259191	0.635267
ASV_638	Bacteria	Firmicutes	Clostridia	Clostridiales	Lachnospiraceae	UC5-1-2E3	NA	0.429888	0.632834	0.346635	0.706718	0.848451	0.906053	0.996446	0.999409
ASV_639	Bacteria	Firmicutes	Clostridia	Clostridiales	Lachnospiraceae	Lachnospiraceae_NK4A136_group	NA	0.396849	0.632834					0.984681	0.997002	0.129406	0.534961
ASV_640	Bacteria	Firmicutes	Bacilli	Lactobacillales	Lactobacillaceae	Lactobacillus	NA
ASV_641	Bacteria	Firmicutes	Clostridia	Clostridiales	Lachnospiraceae	ASF356	NA	0.307589	0.632834					0.00898889	0.239334
ASV_642	Bacteria	Bacteroidetes	Bacteroidia	Chitinophagales	Chitinophagaceae	Vibrionimonas	NA	0.470019	0.632834
ASV_643	Bacteria	Firmicutes	Bacilli	Lactobacillales	Streptococcaceae	Streptococcus	NA	0.321101	0.632834
ASV_644	Bacteria	Bacteroidetes	Bacteroidia	Bacteroidales	Muribaculaceae	NA	NA	0.180952	0.632834
ASV_645	Bacteria	Proteobacteria	Alphaproteobacteria	Rhizobiales	Xanthobacteraceae	Bradyrhizobium	NA	0.436025	0.632834
ASV_646	Bacteria	Firmicutes	Clostridia	Clostridiales	Lachnospiraceae	Lachnospiraceae_NK4A136_group	NA	0.409241	0.632834
ASV_647	Bacteria	Firmicutes	Clostridia	Clostridiales	Lachnospiraceae	NA	NA	0.396849	0.632834					0.201171	0.605574	0.760276	0.918943
ASV_648	Bacteria	Firmicutes	Clostridia	Clostridiales	Lachnospiraceae	Roseburia	NA	0.30417	0.632834					0.139025	0.530512
ASV_649	Bacteria	Firmicutes	Clostridia	Clostridiales	Lachnospiraceae	Lachnospiraceae_NK4A136_group	NA			0.525246	0.890449			0.342713	0.70503
ASV_650	Bacteria	Firmicutes	Clostridia	Clostridiales	Lachnospiraceae	Lachnospiraceae_NK4A136_group	NA							0.111689	0.482001
ASV_651	Bacteria	Proteobacteria	Alphaproteobacteria	Rhizobiales	Xanthobacteraceae	Bradyrhizobium	NA	0.306682	0.632834
ASV_652	Bacteria	Firmicutes	Clostridia	Clostridiales	Ruminococcaceae	Oscillibacter	NA	0.375291	0.632834					0.681363	0.885125	0.268419	0.609534
ASV_653	Bacteria	Firmicutes	Clostridia	Clostridiales	Lachnospiraceae	A2	NA	0.305445	0.632834			0.785102	0.863863	0.361754	0.720544	0.166968	0.536282
ASV_654	Bacteria	Firmicutes	Clostridia	Clostridiales	Ruminococcaceae	Ruminiclostridium_9	NA	0.577708	0.698243			0.673952	0.807078	0.342146	0.70503	0.498313	0.779114
ASV_655	Bacteria	Firmicutes	Clostridia	Clostridiales	Lachnospiraceae	Lachnoclostridium	NA							0.403341	0.748841	0.910122	0.968512
ASV_656	Bacteria	Bacteroidetes	Bacteroidia	Chitinophagales	Chitinophagaceae	Vibrionimonas	NA	0.463998	0.632834
ASV_657	Bacteria	Firmicutes	Clostridia	Clostridiales	Lachnospiraceae	Roseburia	NA	0.375291	0.632834			0.589443	0.773839	0.541983	0.811521
ASV_658	Bacteria	Firmicutes	Clostridia	Clostridiales	Ruminococcaceae	Ruminiclostridium_9	NA	0.483794	0.632834					0.0794241	0.424638	0.597666	0.832151
ASV_659	Bacteria	Firmicutes	Clostridia	Clostridiales	Lachnospiraceae	Lachnospiraceae_FCS020_group	NA	0.184598	0.632834			0.415098	0.773839			0.266505	0.609534
ASV_660	Bacteria	Firmicutes	Clostridia	Clostridiales	Lachnospiraceae	Lachnoclostridium	NA	0.319557	0.632834					0.374007	0.729469
ASV_661	Bacteria	Firmicutes	Clostridia	Clostridiales	Lachnospiraceae	NA	NA	0.360464	0.632834	0.0960372	0.459184	0.260782	0.773839	0.935291	0.976428
ASV_662	Bacteria	Firmicutes	Clostridia	Clostridiales	Lachnospiraceae	ASF356	NA			0.790516	0.939674	0.465652	0.773839	0.24189	0.62943	0.215687	0.581516
ASV_663	Bacteria	Firmicutes	Clostridia	Clostridiales	Lachnospiraceae	Lachnospiraceae_NK4A136_group	NA							0.88278	0.958814	0.228699	0.585985
ASV_664	Bacteria	Firmicutes	Clostridia	Clostridiales	Lachnospiraceae	NA	NA	0.341906	0.632834					0.0645206	0.399368	0.764541	0.918943
ASV_665	Bacteria	Firmicutes	Clostridia	Clostridiales	Lachnospiraceae	Lachnospiraceae_NK4A136_group	NA							0.493847	0.793917	0.450651	0.767515
ASV_666	Bacteria	Firmicutes	Clostridia	Clostridiales	Lachnospiraceae	NA	NA							0.795148	0.923956
ASV_667	Bacteria	Firmicutes	Clostridia	Clostridiales	Ruminococcaceae	Ruminiclostridium	NA	0.304315	0.632834					0.722891	0.897504
ASV_668	Bacteria	Actinobacteria	Actinobacteria	Actinomycetales	Actinomycetaceae	Actinomyces	NA
ASV_669	Bacteria	Firmicutes	Clostridia	Clostridiales	Lachnospiraceae	NA	NA							0.419304	0.761995
ASV_670	Bacteria	Firmicutes	Clostridia	Clostridiales	Ruminococcaceae	Oscillibacter	NA	0.312774	0.632834					0.0101258	0.239334	0.713586	0.886793
ASV_671	Eukaryota	Euglenozoa	NA	NA	NA	NA	NA
ASV_672	Bacteria	Firmicutes	Clostridia	Clostridiales	Ruminococcaceae	NA	NA	0.324227	0.632834					0.378527	0.729469	0.350812	0.700706
ASV_673	Bacteria	Proteobacteria	Alphaproteobacteria	Rhizobiales	Xanthobacteraceae	Bradyrhizobium	NA	0.442525	0.632834
ASV_674	Bacteria	Actinobacteria	Actinobacteria	Actinomycetales	Actinomycetaceae	Actinomyces	NA	0.344014	0.632834
ASV_675	Bacteria	Firmicutes	Clostridia	Clostridiales	Peptococcaceae	NA	NA					0.608385	0.773839	0.00168035	0.148329	0.057066	0.489745
ASV_676	Bacteria	Bacteroidetes	Bacteroidia	Bacteroidales	Muribaculaceae	NA	NA	0.344628	0.632834
ASV_677	Bacteria	Firmicutes	Bacilli	Bacillales	Staphylococcaceae	Staphylococcus	NA	0.411754	0.632834
ASV_678	Bacteria	Tenericutes	Mollicutes	Mollicutes_RF39	NA	NA	NA							0.199591	0.605574	0.212689	0.577516
ASV_679	Bacteria	Firmicutes	Clostridia	Clostridiales	Lachnospiraceae	NA	NA	0.147721	0.632834					0.0802884	0.42468
ASV_680	Bacteria	Firmicutes	Clostridia	Clostridiales	Lachnospiraceae	NA	NA							0.424337	0.761995	0.160345	0.536282
ASV_681	Bacteria	Patescibacteria	Saccharimonadia	Saccharimonadales	Saccharimonadaceae	Candidatus_Saccharimonas	NA					0.422881	0.773839			0.857069	0.953892
ASV_682	Bacteria	Firmicutes	Clostridia	Clostridiales	Lachnospiraceae	ASF356	NA	0.360464	0.632834	0.13865	0.494109			0.0340389	0.342131	0.328422	0.675304
ASV_683	Bacteria	Firmicutes	Clostridia	Clostridiales	Lachnospiraceae	Lachnospiraceae_NK4A136_group	NA					0.439182	0.773839	0.257485	0.635267	0.488373	0.779114
ASV_684	Bacteria	Firmicutes	Clostridia	Clostridiales	Lachnospiraceae	ASF356	NA			0.815625	0.962071	0.456299	0.773839	0.239403	0.62943	0.207195	0.577516
ASV_685	Bacteria	Actinobacteria	Actinobacteria	Actinomycetales	Actinomycetaceae	Actinomyces	NA	0.422963	0.632834
ASV_686	Bacteria	Firmicutes	Clostridia	Clostridiales	Lachnospiraceae	NA	NA	0.375291	0.632834			0.192072	0.773839	0.714324	0.897504	0.780308	0.918943
ASV_687	Bacteria	Firmicutes	Clostridia	Clostridiales	Lachnospiraceae	NA	NA	0.964315	0.984769			0.555538	0.773839	0.537296	0.808555	0.517206	0.779247
ASV_688	Bacteria	Firmicutes	Clostridia	Clostridiales	Lachnospiraceae	Lachnoclostridium	NA	0.327312	0.632834					0.134567	0.526872
ASV_689	Bacteria	Firmicutes	Clostridia	Clostridiales	Lachnospiraceae	NA	NA							0.707246	0.892068	0.449013	0.767515
ASV_690	Bacteria	Firmicutes	Erysipelotrichia	Erysipelotrichales	Erysipelotrichaceae	NA	NA	0.341906	0.632834					0.283231	0.649996	0.814541	0.931776
ASV_691	Bacteria	Bacteroidetes	Bacteroidia	Bacteroidales	Tannerellaceae	Parabacteroides	NA							0.969341	0.986957
ASV_692	Bacteria	Firmicutes	Bacilli	Lactobacillales	Streptococcaceae	Streptococcus	NA	0.439859	0.632834
ASV_693	Bacteria	Proteobacteria	Alphaproteobacteria	Rhizobiales	Xanthobacteraceae	Bradyrhizobium	NA	0.421833	0.632834
ASV_694	Bacteria	Firmicutes	Clostridia	Clostridiales	Lachnospiraceae	Marvinbryantia	NA	0.483794	0.632834	0.843482	0.966861	0.382874	0.773839	0.471359	0.769226	0.444916	0.767515
ASV_695	Bacteria	Firmicutes	Clostridia	Clostridiales	Lachnospiraceae	Lachnospiraceae_NK4A136_group	NA	0.305612	0.632834					0.268431	0.640083
ASV_696	Bacteria	Firmicutes	Clostridia	Clostridiales	Ruminococcaceae	Oscillibacter	NA	0.135396	0.632834					0.247741	0.62943	0.130791	0.534961
ASV_697	Bacteria	Firmicutes	Clostridia	Clostridiales	Ruminococcaceae	Oscillibacter	NA					0.723173	0.825268	0.158767	0.550439	0.196491	0.571035
ASV_698	Bacteria	Firmicutes	Clostridia	Clostridiales	Lachnospiraceae	Lachnoclostridium	NA	0.381225	0.632834			0.65327	0.796237	0.672377	0.885125
ASV_699	Bacteria	Firmicutes	Bacilli	Lactobacillales	Streptococcaceae	Streptococcus	NA	0.320941	0.632834
ASV_700	Bacteria	Firmicutes	Clostridia	Clostridiales	Ruminococcaceae	Oscillibacter	NA							0.270448	0.640083	0.440104	0.767515
ASV_701	Bacteria	Bacteroidetes	Bacteroidia	Bacteroidales	Tannerellaceae	Parabacteroides	NA									0.672164	0.874776
ASV_702	Bacteria	Firmicutes	Clostridia	Clostridiales	Lachnospiraceae	Lachnospiraceae_NK4A136_group	NA			0.138935	0.494109			0.451723	0.765486	0.845656	0.953892
ASV_703	Bacteria	Bacteroidetes	Bacteroidia	Bacteroidales	Tannerellaceae	Parabacteroides	NA
ASV_704	Bacteria	Firmicutes	Clostridia	Clostridiales	Ruminococcaceae	Ruminiclostridium	NA							0.299269	0.660372	0.512128	0.779247
ASV_705	Bacteria	Firmicutes	Clostridia	Clostridiales	Lachnospiraceae	Lachnospiraceae_NK4A136_group	NA					0.407771	0.773839	0.459577	0.76721
ASV_706	Bacteria	Actinobacteria	Coriobacteriia	Coriobacteriales	Eggerthellaceae	Adlercreutzia	NA			0.109907	0.459184	0.938698	0.965233	0.996183	0.999409
ASV_707	Bacteria	Bacteroidetes	Bacteroidia	Bacteroidales	Muribaculaceae	NA	NA					0.425074	0.773839
ASV_708	Bacteria	Firmicutes	Clostridia	Clostridiales	Lachnospiraceae	ASF356	NA					0.397969	0.773839	0.239737	0.62943	0.20092	0.571172
ASV_709	Bacteria	Firmicutes	Clostridia	Clostridiales	Family_XIII	Family_XIII_AD3011_group	NA	0.34982	0.632834					3.36006e-05	0.0108754	0.0404868	0.489745
ASV_710	Bacteria	Firmicutes	Clostridia	Clostridiales	Lachnospiraceae	NA	NA							0.77671	0.914165	0.798468	0.922198
ASV_711	Bacteria	Firmicutes	Clostridia	Clostridiales	Lachnospiraceae	NA	NA					0.437093	0.773839	0.922599	0.970803
ASV_712	Bacteria	Firmicutes	Clostridia	Clostridiales	Lachnospiraceae	NA	NA	0.972626	0.984769					0.0289416	0.333743
ASV_713	Bacteria	Firmicutes	Clostridia	Clostridiales	Lachnospiraceae	NA	NA	0.115895	0.632834			0.486138	0.773839	0.082941	0.42761
ASV_714	Bacteria	Actinobacteria	Actinobacteria	Micrococcales	Micrococcaceae	Arthrobacter	davidanieli					0.580828	0.773839
ASV_715	Bacteria	Proteobacteria	Gammaproteobacteria	Enterobacteriales	Enterobacteriaceae	Yokenella	NA	0.32008	0.632834
ASV_716	Bacteria	Bacteroidetes	Bacteroidia	Chitinophagales	Chitinophagaceae	Vibrionimonas	NA	0.428894	0.632834
ASV_717	Bacteria	Firmicutes	Clostridia	Clostridiales	Lachnospiraceae	NA	NA							0.846538	0.947034	0.0849328	0.51843
ASV_718	Bacteria	Firmicutes	Clostridia	Clostridiales	Lachnospiraceae	Lachnospiraceae_UCG-001	NA							0.516488	0.806285
ASV_719	Bacteria	Firmicutes	Clostridia	Clostridiales	Ruminococcaceae	Anaerotruncus	NA							0.646757	0.87353	0.0931653	0.534961
ASV_720	Bacteria	Firmicutes	Clostridia	Clostridiales	Ruminococcaceae	Ruminococcaceae_UCG-014	NA							0.316591	0.679038	0.661455	0.874776
ASV_721	Bacteria	Firmicutes	Clostridia	Clostridiales	Lachnospiraceae	NA	NA	0.577708	0.698243			0.583022	0.773839	0.534528	0.808555
ASV_722	Bacteria	Firmicutes	Clostridia	Clostridiales	Ruminococcaceae	Ruminococcaceae_UCG-014	NA					0.593913	0.773839	0.691358	0.885631	0.416842	0.760886
ASV_723	Bacteria	Proteobacteria	Alphaproteobacteria	Reyranellales	Reyranellaceae	Reyranella	massiliensis	0.435108	0.632834
ASV_724	Bacteria	Firmicutes	Clostridia	Clostridiales	Lachnospiraceae	ASF356	NA			0.980733	0.991211	0.530537	0.773839	0.240823	0.62943	0.211586	0.577516
ASV_725	Bacteria	Firmicutes	Clostridia	Clostridiales	Lachnospiraceae	NA	NA					0.530537	0.773839	0.249154	0.62943
ASV_726	Bacteria	Bacteroidetes	Bacteroidia	Bacteroidales	Bacteroidaceae	Bacteroides	acidifaciens
ASV_727	Bacteria	Firmicutes	Clostridia	Clostridiales	Ruminococcaceae	Ruminiclostridium	NA							0.328155	0.688571	0.0583694	0.489745
ASV_728	Bacteria	Firmicutes	Clostridia	Clostridiales	Lachnospiraceae	NA	NA					0.38849	0.773839	0.212481	0.608149	0.891688	0.962316
ASV_729	Bacteria	Proteobacteria	Gammaproteobacteria	Enterobacteriales	Enterobacteriaceae	Rahnella	NA
ASV_730	Bacteria	Proteobacteria	Alphaproteobacteria	Rhizobiales	Xanthobacteraceae	Bradyrhizobium	NA
ASV_731	Bacteria	Firmicutes	Clostridia	Clostridiales	Lachnospiraceae	NA	NA	0.317761	0.632834					0.185512	0.592333
ASV_732	Bacteria	Firmicutes	Erysipelotrichia	Erysipelotrichales	Erysipelotrichaceae	NA	NA							0.70278	0.891849	0.986891	0.999909
ASV_733	Bacteria	Bacteroidetes	Bacteroidia	Bacteroidales	Muribaculaceae	NA	NA					0.135277	0.773839	0.231607	0.62943	0.170966	0.536282
ASV_734	Bacteria	Proteobacteria	Alphaproteobacteria	Rhodobacterales	Rhodobacteraceae	Paenirhodobacter	enshiensis	0.343021	0.632834
ASV_735	Bacteria	Firmicutes	Clostridia	Clostridiales	Lachnospiraceae	NA	NA	0.311899	0.632834	0.717104	0.919214	0.668481	0.802177	0.830525	0.939906	0.158508	0.536282
ASV_736	Bacteria	Bacteroidetes	Bacteroidia	Flavobacteriales	Weeksellaceae	Moheibacter	NA	0.292445	0.632834
ASV_737	Eukaryota	Euglenozoa	NA	NA	NA	NA	NA
ASV_738	Bacteria	Firmicutes	Clostridia	Clostridiales	Ruminococcaceae	Ruminococcaceae_UCG-014	NA					0.762271	0.846644	0.749798	0.90082	0.516125	0.779247
ASV_739	Bacteria	Firmicutes	Clostridia	Clostridiales	Ruminococcaceae	Ruminiclostridium_9	NA	0.151536	0.632834			0.608385	0.773839	0.72433	0.897504	0.123751	0.534961
ASV_740	Bacteria	Tenericutes	Mollicutes	Mollicutes_RF39	NA	NA	NA							0.867977	0.952981	0.769873	0.918943
ASV_741	Bacteria	Actinobacteria	Coriobacteriia	Coriobacteriales	Eggerthellaceae	Denitrobacterium	NA			0.990803	0.992902	0.990938	0.993101	0.24008	0.62943
ASV_742	Bacteria	Firmicutes	Clostridia	Clostridiales	Lachnospiraceae	Lachnospiraceae_UCG-001	NA					0.953579	0.975365	0.150366	0.533747	0.124899	0.534961
ASV_743	Bacteria	Firmicutes	Clostridia	Clostridiales	Ruminococcaceae	Ruminiclostridium_9	NA	0.432639	0.632834
ASV_744	Bacteria	Firmicutes	Bacilli	Lactobacillales	Streptococcaceae	Streptococcus	NA	0.219815	0.632834
ASV_745	Bacteria	Firmicutes	Clostridia	Clostridiales	Lachnospiraceae	A2	NA	0.308794	0.632834	0.784701	0.939674			0.677622	0.885125
ASV_746	Bacteria	Tenericutes	Mollicutes	Anaeroplasmatales	Anaeroplasmataceae	Anaeroplasma	NA							0.534796	0.808555	0.734276	0.905093
ASV_747	Bacteria	Firmicutes	Clostridia	Clostridiales	Lachnospiraceae	Lachnospiraceae_NK4A136_group	NA					0.593755	0.773839	0.531859	0.808555	0.652387	0.874776
ASV_748	Bacteria	Firmicutes	Clostridia	Clostridiales	Clostridiales_vadinBB60_group	NA	NA	0.341906	0.632834					0.487174	0.787098	0.508199	0.779247
ASV_749	Eukaryota	NA	NA	NA	NA	NA	NA
ASV_750	Bacteria	Firmicutes	Clostridia	Clostridiales	Lachnospiraceae	Acetatifactor	NA	0.132493	0.632834					0.36116	0.720544	0.27081	0.609941
ASV_751	Bacteria	Bacteroidetes	Bacteroidia	Bacteroidales	Bacteroidaceae	Bacteroides	NA
ASV_752	Bacteria	Firmicutes	Clostridia	Clostridiales	Ruminococcaceae	NA	NA							0.402242	0.748232	0.252094	0.599921
ASV_753	Bacteria	Proteobacteria	Gammaproteobacteria	Pasteurellales	Pasteurellaceae	Rodentibacter	NA	0.463908	0.632834
ASV_754	Bacteria	Firmicutes	Clostridia	Clostridiales	Lachnospiraceae	Lachnospiraceae_NK4A136_group	NA	0.433839	0.632834
ASV_755	Bacteria	Firmicutes	Clostridia	Clostridiales	Ruminococcaceae	GCA-900066225	NA	0.888096	0.93917					0.776288	0.914165	0.103333	0.534961
ASV_756	Bacteria	Firmicutes	Clostridia	Clostridiales	Lachnospiraceae	Lachnoclostridium	NA							0.498228	0.795689
ASV_757	Bacteria	Actinobacteria	Coriobacteriia	Coriobacteriales	Eggerthellaceae	Adlercreutzia	NA			0.269418	0.647097	0.208016	0.773839	0.130849	0.518591
ASV_758	Bacteria	Proteobacteria	Alphaproteobacteria	Rhizobiales	Xanthobacteraceae	Bradyrhizobium	NA	0.320738	0.632834
ASV_759	Bacteria	Firmicutes	Clostridia	Clostridiales	Lachnospiraceae	NA	NA	0.577708	0.698243			0.410623	0.773839	0.0398155	0.342131	0.672035	0.874776
ASV_760	Bacteria	Firmicutes	Clostridia	Clostridiales	Lachnospiraceae	NA	NA							0.00674432	0.239334	0.22186	0.583722
ASV_761	Bacteria	Actinobacteria	Actinobacteria	Micrococcales	Microbacteriaceae	Microbacterium	NA	0.445221	0.632834
ASV_762	Bacteria	Proteobacteria	Alphaproteobacteria	Rhizobiales	Xanthobacteraceae	Bradyrhizobium	NA	0.416748	0.632834
ASV_763	Bacteria	Firmicutes	Clostridia	Clostridiales	Ruminococcaceae	Ruminiclostridium_9	NA	0.141747	0.632834	0.189758	0.557487			0.778397	0.91504
ASV_764	Bacteria	Proteobacteria	Alphaproteobacteria	Rhizobiales	Xanthobacteraceae	Bradyrhizobium	NA	0.445788	0.632834
ASV_765	Bacteria	Bacteroidetes	Bacteroidia	Flavobacteriales	Weeksellaceae	Bergeyella	NA	0.480562	0.632834
ASV_766	Bacteria	Firmicutes	Clostridia	Clostridiales	Ruminococcaceae	Ruminiclostridium_5	NA	0.577708	0.698243	0.0733024	0.459184	0.194762	0.773839	0.231528	0.62943	0.250481	0.599921
ASV_767	Bacteria	Firmicutes	Clostridia	Clostridiales	Ruminococcaceae	NA	NA	0.341647	0.632834			0.355471	0.773839	0.103053	0.476638
ASV_768	Bacteria	Firmicutes	Clostridia	Clostridiales	Ruminococcaceae	Ruminococcaceae_UCG-014	NA					0.384714	0.773839	0.0359735	0.342131
ASV_769	Bacteria	Bacteroidetes	Bacteroidia	Bacteroidales	Muribaculaceae	NA	NA	0.429897	0.632834
ASV_770	Bacteria	Firmicutes	Clostridia	Clostridiales	Lachnospiraceae	Lachnoclostridium_10	NA	0.747301	0.832501	0.969378	0.991211			0.321288	0.684147	0.384872	0.731459
ASV_771	Bacteria	Firmicutes	Clostridia	Clostridiales	Ruminococcaceae	Ruminiclostridium	NA	0.316229	0.632834			0.382374	0.773839			0.381993	0.730477
ASV_772	Bacteria	Firmicutes	Clostridia	Clostridiales	Clostridiales_vadinBB60_group	NA	NA							0.871521	0.952981	0.453415	0.76879
ASV_773	Bacteria	Firmicutes	Clostridia	Clostridiales	Ruminococcaceae	Ruminiclostridium	NA	0.483794	0.632834	0.0784849	0.459184			0.999409	0.999409	0.565646	0.809733
ASV_774	Bacteria	Firmicutes	Clostridia	Clostridiales	Lachnospiraceae	Lachnospiraceae_NK4A136_group	NA							0.698852	0.891702	0.70274	0.886793
ASV_775	Bacteria	Proteobacteria	Alphaproteobacteria	Rhizobiales	Xanthobacteraceae	Bradyrhizobium	NA	0.3198	0.632834
ASV_776	Bacteria	Proteobacteria	Alphaproteobacteria	Rhizobiales	Xanthobacteraceae	Bradyrhizobium	NA	0.472259	0.632834
ASV_777	Bacteria	Firmicutes	Clostridia	Clostridiales	Ruminococcaceae	Ruminiclostridium_5	NA	0.467709	0.632834
ASV_778	Bacteria	Proteobacteria	Alphaproteobacteria	Rhizobiales	Xanthobacteraceae	Bradyrhizobium	NA	0.451997	0.632834
ASV_779	Bacteria	Firmicutes	Clostridia	Clostridiales	Ruminococcaceae	Ruminococcaceae_UCG-014	NA							0.458738	0.76721	0.54933	0.801412
ASV_780	Bacteria	Firmicutes	Clostridia	Clostridiales	Lachnospiraceae	NA	NA			0.674967	0.91217	0.177116	0.773839	0.110056	0.482001
ASV_781	Bacteria	Firmicutes	Clostridia	Clostridiales	Lachnospiraceae	NA	NA							0.0234185	0.333743	0.485643	0.779114
ASV_782	Bacteria	Firmicutes	Clostridia	Clostridiales	Lachnospiraceae	Lachnospiraceae_FCS020_group	NA	0.757039	0.838741					0.782934	0.918151	0.993759	0.999909
ASV_783	Bacteria	Firmicutes	Clostridia	Clostridiales	Lachnospiraceae	NA	NA	0.493515	0.634847	0.891704	0.990084	0.415976	0.773839			0.68913	0.878031
ASV_784	Bacteria	Proteobacteria	Alphaproteobacteria	Rhizobiales	Beijerinckiaceae	Methylobacterium	NA	0.445763	0.632834
ASV_785	Bacteria	Firmicutes	Erysipelotrichia	Erysipelotrichales	Erysipelotrichaceae	NA	NA							0.20535	0.605574	0.0119716	0.383534
ASV_786	Bacteria	Firmicutes	Clostridia	Clostridiales	Lachnospiraceae	NA	NA	0.132493	0.632834					0.724041	0.897504	0.772561	0.918943
ASV_787	Bacteria	Firmicutes	Clostridia	Clostridiales	Lachnospiraceae	Lachnospiraceae_NK4A136_group	NA			0.651347	0.91217			0.247285	0.62943
ASV_788	Bacteria	Firmicutes	Bacilli	Lactobacillales	Lactobacillaceae	Lactobacillus	NA
ASV_789	Bacteria	Firmicutes	Clostridia	Clostridiales	Lachnospiraceae	NA	NA							0.58876	0.849898	0.688526	0.878031
ASV_790	Bacteria	Firmicutes	Clostridia	Clostridiales	Lachnospiraceae	Lachnospiraceae_NK4A136_group	NA	0.441862	0.632834
ASV_791	Bacteria	Firmicutes	Clostridia	Clostridiales	Ruminococcaceae	Ruminococcaceae_UCG-014	NA			0.935794	0.991211	0.374942	0.773839	0.166436	0.557273
ASV_792	Bacteria	Bacteroidetes	Bacteroidia	Bacteroidales	Muribaculaceae	NA	NA	0.171623	0.632834
ASV_793	Bacteria	Proteobacteria	Alphaproteobacteria	Rhizobiales	Xanthobacteraceae	Bradyrhizobium	NA	0.445608	0.632834
ASV_794	Bacteria	Firmicutes	Clostridia	Clostridiales	Ruminococcaceae	Oscillibacter	NA			0.784701	0.939674			0.285562	0.650584	0.245439	0.596401
ASV_795	Bacteria	Firmicutes	Clostridia	Clostridiales	Lachnospiraceae	Lachnoclostridium	NA							0.246209	0.62943
ASV_796	Bacteria	Firmicutes	Clostridia	Clostridiales	Lachnospiraceae	Lachnospiraceae_NK4A136_group	NA	0.132493	0.632834					0.628512	0.870592	0.677399	0.877514
ASV_797	Bacteria	Bacteroidetes	Bacteroidia	Chitinophagales	Chitinophagaceae	Vibrionimonas	NA	0.320772	0.632834
ASV_798	Bacteria	Firmicutes	Clostridia	Clostridiales	Lachnospiraceae	Coprococcus_2	NA			0.622039	0.91217			0.128391	0.513035
ASV_799	Bacteria	Firmicutes	Clostridia	Clostridiales	Ruminococcaceae	Ruminococcaceae_UCG-013	NA					0.326445	0.773839	0.622765	0.86777
ASV_800	Bacteria	Firmicutes	Clostridia	Clostridiales	Clostridiales_vadinBB60_group	NA	NA			0.179192	0.538654			0.806242	0.928577	0.630108	0.858522
ASV_801	Bacteria	Firmicutes	Clostridia	Clostridiales	Lachnospiraceae	NA	NA	0.341725	0.632834
ASV_802	Bacteria	Firmicutes	Clostridia	Clostridiales	Lachnospiraceae	Lachnoclostridium	NA	0.319557	0.632834	0.529366	0.890449			0.0847319	0.42761	0.134119	0.534961
ASV_803	Bacteria	Firmicutes	Clostridia	Clostridiales	Lachnospiraceae	Lachnospiraceae_NK4A136_group	NA							0.200406	0.605574	0.191474	0.564071
ASV_804	Bacteria	Firmicutes	Clostridia	Clostridiales	Lachnospiraceae	Roseburia	NA					0.29554	0.773839	0.528522	0.808555	0.838416	0.950537
ASV_805	Bacteria	Firmicutes	Clostridia	Clostridiales	Lachnospiraceae	Lachnoclostridium	NA	0.327312	0.632834			0.626824	0.780709	0.0166158	0.31208
ASV_806	Bacteria	Proteobacteria	Gammaproteobacteria	Enterobacteriales	Enterobacteriaceae	Escherichia/Shigella	flexneri					0.52538	0.773839
ASV_807	Bacteria	Firmicutes	Clostridia	Clostridiales	Lachnospiraceae	Lachnospiraceae_UCG-006	NA					0.327169	0.773839	0.243791	0.62943	0.0823245	0.517595
ASV_808	Bacteria	Firmicutes	Clostridia	Clostridiales	Ruminococcaceae	Ruminococcaceae_UCG-005	NA	0.483794	0.632834	0.0879791	0.459184	0.583022	0.773839	0.31583	0.679038	0.689306	0.878031
ASV_809	Bacteria	Proteobacteria	Gammaproteobacteria	Pasteurellales	Pasteurellaceae	Rodentibacter	NA	0.470187	0.632834
ASV_810	Bacteria	Actinobacteria	Coriobacteriia	Coriobacteriales	Eggerthellaceae	Enterorhabdus	NA			0.411167	0.774282	0.840613	0.903775	0.695872	0.889068
ASV_811	Bacteria	Proteobacteria	Alphaproteobacteria	Rhizobiales	Xanthobacteraceae	Bradyrhizobium	NA	0.294318	0.632834
ASV_812	Bacteria	Firmicutes	Clostridia	Clostridiales	Lachnospiraceae	NA	NA	0.375291	0.632834					0.57372	0.838979	0.219421	0.581722
ASV_813	Bacteria	Firmicutes	Clostridia	Clostridiales	Ruminococcaceae	Ruminiclostridium	NA							0.282352	0.649677	0.0977364	0.534961
ASV_814	Bacteria	Firmicutes	Clostridia	Clostridiales	Lachnospiraceae	Lachnoclostridium	NA							0.599574	0.856156	0.367084	0.721116
ASV_815	Bacteria	Bacteroidetes	Bacteroidia	Bacteroidales	Muribaculaceae	NA	NA			0.828381	0.965084			0.289142	0.650584	0.79533	0.922198
ASV_816	Bacteria	Bacteroidetes	Bacteroidia	Bacteroidales	Muribaculaceae	NA	NA	0.420679	0.632834
ASV_817	Bacteria	Firmicutes	Clostridia	Clostridiales	Lachnospiraceae	Roseburia	NA					0.593755	0.773839	0.648041	0.87353	0.858878	0.953892
ASV_818	Bacteria	Bacteroidetes	Bacteroidia	Bacteroidales	Muribaculaceae	NA	NA					0.447366	0.773839
ASV_819	Bacteria	Firmicutes	Clostridia	Clostridiales	Lachnospiraceae	NA	NA	0.307259	0.632834	0.855246	0.967779
ASV_820	Bacteria	Firmicutes	Clostridia	Clostridiales	Lachnospiraceae	NA	NA	0.319557	0.632834					0.086306	0.42761
ASV_821	Bacteria	Firmicutes	Clostridia	Clostridiales	Ruminococcaceae	Ruminiclostridium_5	NA	0.577708	0.698243	0.784701	0.939674	0.197778	0.773839	0.188274	0.595638	0.432758	0.767515
ASV_822	Bacteria	Firmicutes	Clostridia	Clostridiales	Ruminococcaceae	Ruminiclostridium_5	NA	0.729454	0.822792					0.632824	0.872519	0.592713	0.829798
ASV_823	Bacteria	Firmicutes	Clostridia	Clostridiales	Lachnospiraceae	NA	NA							0.807489	0.928577	0.510631	0.779247
ASV_824	Bacteria	Firmicutes	Bacilli	Lactobacillales	Streptococcaceae	Streptococcus	acidominimus	0.490291	0.633163			0.555757	0.773839
ASV_825	Bacteria	Bacteroidetes	Bacteroidia	Bacteroidales	Muribaculaceae	NA	NA	0.153023	0.632834
ASV_826	Bacteria	Firmicutes	Clostridia	Clostridiales	Ruminococcaceae	Ruminiclostridium_9	NA	0.321683	0.632834			0.398542	0.773839	0.497003	0.795254	0.112731	0.534961
ASV_827	Bacteria	Proteobacteria	Alphaproteobacteria	Rhizobiales	Xanthobacteraceae	Afipia	NA	0.294599	0.632834
ASV_828	Bacteria	Bacteroidetes	Bacteroidia	Chitinophagales	Chitinophagaceae	Vibrionimonas	NA	0.477046	0.632834
ASV_829	Bacteria	Firmicutes	Clostridia	Clostridiales	Lachnospiraceae	Roseburia	NA	0.429888	0.632834			0.421309	0.773839	0.0353507	0.342131	0.68913	0.878031
ASV_830	Bacteria	Firmicutes	Clostridia	Clostridiales	Lachnospiraceae	NA	NA	0.429888	0.632834			0.658567	0.798512	0.0517964	0.37742	0.849765	0.953892
ASV_831	Bacteria	Firmicutes	Clostridia	Clostridiales	Lachnospiraceae	NA	NA	0.375291	0.632834					0.547288	0.813662	0.0332662	0.489745
ASV_832	Bacteria	Bacteroidetes	Bacteroidia	Bacteroidales	Rikenellaceae	Alistipes	NA	0.320738	0.632834
ASV_833	Bacteria	Proteobacteria	Gammaproteobacteria	Enterobacteriales	Enterobacteriaceae	NA	NA					0.508209	0.773839
ASV_834	Bacteria	Proteobacteria	Alphaproteobacteria	Rhizobiales	Xanthobacteraceae	Bradyrhizobium	NA	0.341817	0.632834
ASV_835	Bacteria	Firmicutes	Clostridia	Clostridiales	Lachnospiraceae	Lachnoclostridium	NA	0.133823	0.632834					0.509006	0.803694
ASV_836	Bacteria	Bacteroidetes	Bacteroidia	Bacteroidales	Muribaculaceae	NA	NA	0.144812	0.632834
ASV_837	Bacteria	Firmicutes	Clostridia	Clostridiales	Lachnospiraceae	Lachnoclostridium	NA	0.323362	0.632834			0.399015	0.773839	0.955453	0.98044
ASV_838	Bacteria	Firmicutes	Clostridia	Clostridiales	Lachnospiraceae	A2	NA	0.31377	0.632834					0.0459464	0.370455
ASV_839	Bacteria	Proteobacteria	Alphaproteobacteria	Rhizobiales	Xanthobacteraceae	Bradyrhizobium	NA	0.453257	0.632834
ASV_840	Bacteria	Firmicutes	Clostridia	Clostridiales	Ruminococcaceae	Ruminiclostridium	NA					0.559384	0.773839	0.208413	0.605574	0.773537	0.918943
ASV_841	Bacteria	Bacteroidetes	Bacteroidia	Bacteroidales	Muribaculaceae	NA	NA	0.339829	0.632834
ASV_842	Bacteria	Firmicutes	Erysipelotrichia	Erysipelotrichales	Erysipelotrichaceae	NA	NA					0.409398	0.773839	0.704478	0.891849	0.626008	0.856544
ASV_843	Bacteria	Firmicutes	Clostridia	Clostridiales	Ruminococcaceae	Oscillibacter	NA	0.483794	0.632834					0.303425	0.660595	0.851316	0.953892
ASV_844	Bacteria	Bacteroidetes	Bacteroidia	Bacteroidales	Muribaculaceae	NA	NA	0.436328	0.632834
ASV_845	Bacteria	Firmicutes	Clostridia	Clostridiales	Lachnospiraceae	Lachnospiraceae_UCG-006	NA			0.090715	0.459184	0.570592	0.773839	0.440138	0.76201	0.0999842	0.534961
ASV_846	Bacteria	Proteobacteria	Alphaproteobacteria	Rhizobiales	Xanthobacteraceae	Bradyrhizobium	NA	0.341243	0.632834
ASV_847	Bacteria	Bacteroidetes	Bacteroidia	Bacteroidales	Bacteroidaceae	Bacteroides	NA	0.155429	0.632834
ASV_848	Bacteria	Bacteroidetes	Bacteroidia	Chitinophagales	Chitinophagaceae	Sediminibacterium	NA	0.291257	0.632834
ASV_849	Bacteria	Proteobacteria	Alphaproteobacteria	Rhizobiales	Xanthobacteraceae	Bradyrhizobium	NA	0.451895	0.632834
ASV_850	Bacteria	Firmicutes	Clostridia	Clostridiales	Lachnospiraceae	Lachnospiraceae_NK4A136_group	NA	0.396849	0.632834					0.808685	0.928577
ASV_851	Bacteria	Firmicutes	Clostridia	Clostridiales	Lachnospiraceae	A2	NA	0.311899	0.632834	0.0746884	0.459184	0.293391	0.773839	0.814482	0.930254
ASV_852	Bacteria	Proteobacteria	Gammaproteobacteria	Pasteurellales	Pasteurellaceae	Muribacter	NA	0.421634	0.632834
ASV_853	Bacteria	Firmicutes	Clostridia	Clostridiales	Ruminococcaceae	NA	NA	0.310442	0.632834					0.30175	0.660372	0.999462	0.999909
ASV_854	Eukaryota	NA	NA	NA	NA	NA	NA
ASV_855	Bacteria	Bacteroidetes	Bacteroidia	Bacteroidales	Muribaculaceae	Muribaculum	NA	0.153023	0.632834
ASV_856	Bacteria	Bacteroidetes	Bacteroidia	Chitinophagales	Chitinophagaceae	Sediminibacterium	NA	0.291277	0.632834
ASV_857	Bacteria	Firmicutes	Clostridia	Clostridiales	Clostridiales_vadinBB60_group	NA	NA							0.68751	0.885125	0.997193	0.999909
ASV_858	Bacteria	Firmicutes	Clostridia	Clostridiales	Lachnospiraceae	GCA-900066575	NA	0.470377	0.632834			0.398542	0.773839	0.317455	0.679038	0.574286	0.815978
ASV_859	Bacteria	Firmicutes	Clostridia	Clostridiales	Lachnospiraceae	NA	NA	0.151536	0.632834					0.522479	0.808555
ASV_860	Bacteria	Bacteroidetes	Bacteroidia	Bacteroidales	Bacteroidaceae	Bacteroides	NA	0.458177	0.632834
ASV_861	Bacteria	Firmicutes	Clostridia	Clostridiales	Ruminococcaceae	Ruminiclostridium	NA	0.606267	0.725196					0.341184	0.704873	0.983244	0.999274
ASV_862	Bacteria	Firmicutes	Clostridia	Clostridiales	Lachnospiraceae	NA	NA	0.747301	0.832501			0.181977	0.773839	0.0393906	0.342131
ASV_863	Bacteria	Firmicutes	Clostridia	Clostridiales	Lachnospiraceae	NA	NA							0.175189	0.575311
ASV_864	Bacteria	Proteobacteria	Alphaproteobacteria	Rhizobiales	Xanthobacteraceae	Afipia	NA	0.319437	0.632834
ASV_865	Bacteria	Firmicutes	Clostridia	Clostridiales	Lachnospiraceae	NA	NA	0.132493	0.632834	0.0704826	0.459184					0.578181	0.818402
ASV_866	Bacteria	Firmicutes	Clostridia	Clostridiales	Lachnospiraceae	NA	NA							0.685467	0.885125	0.253206	0.599921
ASV_867	Bacteria	Firmicutes	Clostridia	Clostridiales	Lachnospiraceae	NA	NA							0.280715	0.647445	0.232903	0.585985
ASV_868	Bacteria	Firmicutes	Clostridia	Clostridiales	Lachnospiraceae	Lachnospiraceae_FCS020_group	NA	0.130494	0.632834	0.978406	0.991211	0.608028	0.773839	0.122576	0.504329
ASV_869	Bacteria	Firmicutes	Clostridia	Clostridiales	Lachnospiraceae	GCA-900066575	NA							0.939795	0.977025
ASV_870	Bacteria	Firmicutes	Clostridia	Clostridiales	Clostridiales_vadinBB60_group	NA	NA							0.438319	0.76201	0.861593	0.954129
ASV_871	Bacteria	Firmicutes	Clostridia	Clostridiales	Ruminococcaceae	Ruminococcaceae_UCG-009	NA					0.536973	0.773839	0.505708	0.80367
ASV_872	Bacteria	Firmicutes	Clostridia	Clostridiales	Lachnospiraceae	Lachnoclostridium	NA			0.0844302	0.459184	0.254951	0.773839	0.707407	0.892068
ASV_873	Bacteria	Firmicutes	Clostridia	Clostridiales	Lachnospiraceae	Lachnospiraceae_NK4A136_group	NA									0.450597	0.767515
ASV_874	Bacteria	Firmicutes	Clostridia	Clostridiales	Lachnospiraceae	A2	NA	0.715017	0.812155			0.906387	0.945372	0.610385	0.865232
ASV_875	Bacteria	Firmicutes	Clostridia	Clostridiales	Lachnospiraceae	NA	NA			0.19663	0.559555			0.12543	0.509731	0.0237684	0.453382
ASV_876	Bacteria	Firmicutes	Clostridia	Clostridiales	Lachnospiraceae	Lachnospiraceae_NK4A136_group	NA							0.183807	0.58903	0.120798	0.534961
ASV_877	Bacteria	Proteobacteria	Alphaproteobacteria	Rhizobiales	Xanthobacteraceae	Bradyrhizobium	NA	0.315346	0.632834
ASV_878	Bacteria	Firmicutes	Clostridia	Clostridiales	Lachnospiraceae	Lachnospiraceae_NK4A136_group	NA	0.453677	0.632834
ASV_879	Bacteria	Proteobacteria	Alphaproteobacteria	Rhizobiales	Xanthobacteraceae	Bradyrhizobium	NA	0.442742	0.632834
ASV_880	Bacteria	Firmicutes	Clostridia	Clostridiales	Lachnospiraceae	Lachnoclostridium	NA	0.436912	0.632834			0.437093	0.773839
ASV_881	Bacteria	Firmicutes	Clostridia	Clostridiales	Ruminococcaceae	Oscillibacter	NA							0.0177588	0.325354	0.102325	0.534961
ASV_882	Bacteria	Bacteroidetes	Bacteroidia	Chitinophagales	Chitinophagaceae	Vibrionimonas	NA	0.483551	0.632834
ASV_883	Bacteria	Firmicutes	Clostridia	Clostridiales	Lachnospiraceae	Lachnoclostridium	NA	0.310442	0.632834
ASV_884	Bacteria	Firmicutes	Clostridia	Clostridiales	Lachnospiraceae	NA	NA					0.63151	0.783664	0.159899	0.550439	0.120005	0.534961
ASV_885	Bacteria	Firmicutes	Clostridia	Clostridiales	Lachnospiraceae	NA	NA	0.131066	0.632834			0.589443	0.773839	0.638855	0.873106
ASV_886	Bacteria	Proteobacteria	Alphaproteobacteria	Rhizobiales	Xanthobacteraceae	Bradyrhizobium	NA	0.320802	0.632834
ASV_887	Bacteria	Firmicutes	Clostridia	Clostridiales	Lachnospiraceae	Lachnoclostridium	NA	0.429888	0.632834					0.348259	0.71042	0.270996	0.609941
ASV_888	Bacteria	Bacteroidetes	Bacteroidia	Bacteroidales	Muribaculaceae	NA	NA	0.443157	0.632834
ASV_889	Bacteria	Bacteroidetes	Bacteroidia	Bacteroidales	Muribaculaceae	NA	NA
ASV_890	Bacteria	Proteobacteria	Gammaproteobacteria	Pasteurellales	Pasteurellaceae	Muribacter	NA	0.478143	0.632834
ASV_891	Bacteria	Firmicutes	Clostridia	Clostridiales	Ruminococcaceae	Ruminococcaceae_UCG-014	NA							0.703673	0.891849	0.743675	0.910794
ASV_892	Bacteria	Proteobacteria	Alphaproteobacteria	Rhizobiales	Xanthobacteraceae	Bradyrhizobium	NA	0.461428	0.632834
ASV_893	Bacteria	Firmicutes	Clostridia	Clostridiales	Ruminococcaceae	Ruminiclostridium	NA							0.210523	0.607119
ASV_894	Bacteria	Firmicutes	Clostridia	Clostridiales	Lachnospiraceae	A2	NA					0.486138	0.773839	0.179087	0.579646
ASV_895	Bacteria	Bacteroidetes	Bacteroidia	Bacteroidales	Muribaculaceae	NA	NA	0.475971	0.632834
ASV_896	Bacteria	Patescibacteria	Saccharimonadia	Saccharimonadales	Saccharimonadaceae	Candidatus_Saccharimonas	NA					0.555538	0.773839	0.0270826	0.333743
ASV_897	Bacteria	Firmicutes	Clostridia	Clostridiales	Lachnospiraceae	NA	NA	0.338257	0.632834
ASV_898	Bacteria	Firmicutes	Clostridia	Clostridiales	Lachnospiraceae	Lachnospiraceae_NK4A136_group	NA							0.023345	0.333743	0.0671249	0.489745
ASV_899	Bacteria	Firmicutes	Clostridia	Clostridiales	Lachnospiraceae	Lachnospiraceae_UCG-006	NA			0.692379	0.914856	0.803351	0.878265	0.278201	0.646636	0.670252	0.874776
ASV_900	Bacteria	Firmicutes	Clostridia	Clostridiales	Lachnospiraceae	GCA-900066575	NA					0.583022	0.773839	0.416622	0.760413
ASV_901	Bacteria	Firmicutes	Clostridia	Clostridiales	Lachnospiraceae	Lachnoclostridium	NA					0.50035	0.773839	0.512668	0.804201
ASV_902	Bacteria	Bacteroidetes	Bacteroidia	Bacteroidales	Muribaculaceae	NA	NA	0.339721	0.632834
ASV_903	Bacteria	Bacteroidetes	Bacteroidia	Bacteroidales	Muribaculaceae	Muribaculum	NA	0.157685	0.632834
ASV_904	Bacteria	Bacteroidetes	Bacteroidia	Bacteroidales	Muribaculaceae	NA	NA	0.147721	0.632834
ASV_905	Bacteria	Firmicutes	Clostridia	Clostridiales	Ruminococcaceae	Anaerotruncus	NA	0.331105	0.632834	0.0657924	0.459184			0.182549	0.586936
ASV_906	Bacteria	Firmicutes	Clostridia	Clostridiales	Ruminococcaceae	Ruminococcaceae_UCG-013	NA			0.201108	0.559555	0.84208	0.903775	0.810383	0.929022	0.471324	0.778399
ASV_907	Bacteria	Proteobacteria	Alphaproteobacteria	Rhizobiales	Xanthobacteraceae	Bradyrhizobium	NA	0.290817	0.632834
ASV_908	Bacteria	Firmicutes	Clostridia	Clostridiales	Lachnospiraceae	NA	NA					0.583022	0.773839	0.687706	0.885125	0.153651	0.536282
ASV_909	Bacteria	Firmicutes	Clostridia	Clostridiales	Lachnospiraceae	NA	NA							0.232346	0.62943	0.171149	0.536282
ASV_910	Bacteria	Proteobacteria	Gammaproteobacteria	Pasteurellales	Pasteurellaceae	Muribacter	NA	0.432364	0.632834
ASV_911	Bacteria	Bacteroidetes	Bacteroidia	Bacteroidales	Tannerellaceae	Parabacteroides	NA
ASV_912	Bacteria	Firmicutes	Clostridia	Clostridiales	Lachnospiraceae	NA	NA			0.980733	0.991211			0.181039	0.584017	0.167672	0.536282
ASV_913	Bacteria	Firmicutes	Clostridia	Clostridiales	Ruminococcaceae	NA	NA	0.268401	0.632834					0.751128	0.90082	0.71478	0.886793
ASV_914	Eukaryota	NA	NA	NA	NA	NA	NA
ASV_915	Bacteria	Firmicutes	Clostridia	Clostridiales	Family_XIII	Family_XIII_UCG-001	NA	0.13858	0.632834					0.676765	0.885125	0.965311	0.988894
ASV_916	Bacteria	Firmicutes	Clostridia	Clostridiales	Family_XIII	Anaerovorax	NA					0.105906	0.773839	0.10331	0.476638	0.101573	0.534961
ASV_917	Bacteria	Firmicutes	Clostridia	Clostridiales	Ruminococcaceae	Ruminiclostridium_9	NA							0.514711	0.806103	0.807003	0.927324
ASV_918	Bacteria	Actinobacteria	Actinobacteria	Actinomycetales	Actinomycetaceae	Mobiluncus	NA
ASV_919	Bacteria	Firmicutes	Bacilli	Lactobacillales	Lactobacillaceae	Lactobacillus	NA
ASV_920	Bacteria	Firmicutes	Clostridia	Clostridiales	Lachnospiraceae	NA	NA	0.360464	0.632834					0.394926	0.74481	0.68913	0.878031
ASV_921	Bacteria	Firmicutes	Clostridia	Clostridiales	Lachnospiraceae	NA	NA							0.870749	0.952981	0.477477	0.77845
ASV_922	Bacteria	Bacteroidetes	Bacteroidia	Bacteroidales	Muribaculaceae	NA	NA	0.476234	0.632834
ASV_923	Bacteria	Firmicutes	Clostridia	Clostridiales	Lachnospiraceae	Lachnospiraceae_UCG-001	NA	0.483794	0.632834			0.494834	0.773839	0.313473	0.679038
ASV_924	Bacteria	Proteobacteria	Gammaproteobacteria	Enterobacteriales	Enterobacteriaceae	Escherichia/Shigella	NA					0.539177	0.773839
ASV_925	Bacteria	Firmicutes	Clostridia	Clostridiales	Ruminococcaceae	Ruminiclostridium_9	NA	0.151536	0.632834	0.0819336	0.459184			0.260301	0.635267	0.858878	0.953892
ASV_926	Bacteria	Firmicutes	Clostridia	Clostridiales	Lachnospiraceae	NA	NA	0.972626	0.984769	0.0713036	0.459184			0.297389	0.657777	0.145963	0.534961
ASV_927	Eukaryota	NA	NA	NA	NA	NA	NA
ASV_928	Bacteria	Proteobacteria	Alphaproteobacteria	Rhizobiales	Xanthobacteraceae	Bradyrhizobium	NA	0.313971	0.632834
ASV_929	Bacteria	Firmicutes	Clostridia	Clostridiales	Lachnospiraceae	NA	NA	0.31377	0.632834					0.466021	0.768755
ASV_930	Bacteria	Bacteroidetes	Bacteroidia	Bacteroidales	Muribaculaceae	NA	NA	0.444296	0.632834
ASV_931	Bacteria	Firmicutes	Clostridia	Clostridiales	Ruminococcaceae	Ruminiclostridium_9	NA	0.972626	0.984769	0.555781	0.902585			0.534894	0.808555
ASV_932	Bacteria	Firmicutes	Clostridia	Clostridiales	Lachnospiraceae	Lachnospiraceae_NK4A136_group	NA	0.427732	0.632834
ASV_933	Bacteria	Firmicutes	Bacilli	Lactobacillales	Lactobacillaceae	Lactobacillus	NA	0.442475	0.632834
ASV_934	Bacteria	Firmicutes	Clostridia	Clostridiales	Lachnospiraceae	NA	NA			0.914742	0.991211			0.855056	0.94714	0.773367	0.918943
ASV_935	Bacteria	Firmicutes	Clostridia	Clostridiales	Lachnospiraceae	NA	NA					0.409317	0.773839	0.120041	0.501431
ASV_936	Bacteria	Proteobacteria	Alphaproteobacteria	Rhizobiales	Xanthobacteraceae	Bradyrhizobium	NA	0.320821	0.632834
ASV_937	Bacteria	Firmicutes	Clostridia	Clostridiales	Lachnospiraceae	Lachnospiraceae_NK4A136_group	NA							0.192007	0.601507	0.101854	0.534961
ASV_938	Bacteria	Firmicutes	Clostridia	Clostridiales	Lachnospiraceae	Lachnoclostridium	NA					0.325224	0.773839	0.0766047	0.419154
ASV_939	Bacteria	Actinobacteria	Coriobacteriia	Coriobacteriales	Eggerthellaceae	NA	NA			0.703049	0.914856	0.709147	0.8238	0.0743881	0.41512
ASV_940	Bacteria	Bacteroidetes	Bacteroidia	Bacteroidales	Muribaculaceae	NA	NA	0.320958	0.632834
ASV_941	Bacteria	Firmicutes	Clostridia	Clostridiales	Lachnospiraceae	Roseburia	NA							0.502974	0.800636	0.626411	0.856544
ASV_942	Bacteria	Firmicutes	Clostridia	Clostridiales	Clostridiales_vadinBB60_group	NA	NA			0.119053	0.469095			0.254628	0.635267	0.107746	0.534961
ASV_943	Bacteria	Firmicutes	Clostridia	Clostridiales	NA	NA	NA	0.972626	0.984769					0.165794	0.557046	0.373248	0.723913
ASV_944	Bacteria	Actinobacteria	Coriobacteriia	Coriobacteriales	Eggerthellaceae	Enterorhabdus	NA			0.974279	0.991211	0.96142	0.976873	0.208926	0.605574
ASV_945	Bacteria	Bacteroidetes	Bacteroidia	Bacteroidales	Muribaculaceae	NA	NA	0.426757	0.632834
ASV_946	Bacteria	Firmicutes	Clostridia	Clostridiales	Lachnospiraceae	Lachnospiraceae_NK4A136_group	NA			0.0713036	0.459184	0.585086	0.773839	0.747911	0.90082	0.489214	0.779114
ASV_947	Bacteria	Firmicutes	Clostridia	Clostridiales	Ruminococcaceae	Anaerotruncus	NA			0.396216	0.764939			0.276994	0.646542	0.871458	0.955264
ASV_948	Bacteria	Bacteroidetes	Bacteroidia	Bacteroidales	Muribaculaceae	NA	NA	0.487203	0.633163
ASV_949	Bacteria	Firmicutes	Clostridia	Clostridiales	Lachnospiraceae	NA	NA	0.199726	0.632834
ASV_950	Bacteria	Proteobacteria	Alphaproteobacteria	Rhizobiales	Xanthobacteraceae	Bradyrhizobium	NA	0.353366	0.632834
ASV_951	Bacteria	Firmicutes	Clostridia	Clostridiales	Lachnospiraceae	Lachnospiraceae_NK4A136_group	NA	0.458001	0.632834
ASV_952	Bacteria	Firmicutes	Clostridia	Clostridiales	Lachnospiraceae	GCA-900066575	NA	0.747301	0.832501			0.437093	0.773839	0.428869	0.761995
ASV_953	Bacteria	Bacteroidetes	Bacteroidia	Chitinophagales	Chitinophagaceae	Vibrionimonas	NA	0.349069	0.632834
ASV_954	Bacteria	Firmicutes	Clostridia	Clostridiales	Lachnospiraceae	NA	NA			0.359361	0.723309	0.549204	0.773839	0.102595	0.476638	0.704487	0.886793
ASV_955	Bacteria	Bacteroidetes	Bacteroidia	Bacteroidales	Muribaculaceae	NA	NA	0.13858	0.632834
ASV_956	Bacteria	Bacteroidetes	Bacteroidia	Bacteroidales	Muribaculaceae	NA	NA	0.141747	0.632834
ASV_957	Bacteria	Proteobacteria	Alphaproteobacteria	Rhizobiales	Xanthobacteraceae	Bradyrhizobium	NA	0.3857	0.632834
ASV_958	Bacteria	Firmicutes	Clostridia	Clostridiales	Ruminococcaceae	Ruminiclostridium_9	NA					0.583022	0.773839	0.0286432	0.333743	0.164652	0.536282
ASV_959	Bacteria	Proteobacteria	Alphaproteobacteria	Rhizobiales	Xanthobacteraceae	Bradyrhizobium	NA	0.313831	0.632834
ASV_960	Bacteria	Bacteroidetes	Bacteroidia	Chitinophagales	Chitinophagaceae	Vibrionimonas	NA	0.290785	0.632834
ASV_961	Bacteria	Firmicutes	Clostridia	Clostridiales	Clostridiales_vadinBB60_group	NA	NA							0.827455	0.939717	0.449858	0.767515
ASV_962	Bacteria	Firmicutes	Clostridia	Clostridiales	Ruminococcaceae	Phocea	NA	0.747301	0.832501					0.243476	0.62943	0.492527	0.779114
ASV_963	Bacteria	Firmicutes	Clostridia	Clostridiales	Lachnospiraceae	NA	NA					0.589443	0.773839	0.278366	0.646636	0.0628712	0.489745
ASV_964	Bacteria	Proteobacteria	Alphaproteobacteria	Rhizobiales	Xanthobacteraceae	Bradyrhizobium	NA	0.317771	0.632834
ASV_965	Bacteria	Firmicutes	Clostridia	Clostridiales	Ruminococcaceae	Ruminococcaceae_UCG-014	NA					0.715014	0.824576	0.837167	0.942066	0.590129	0.829224
ASV_966	Bacteria	Firmicutes	Clostridia	Clostridiales	Lachnospiraceae	ASF356	NA							0.186057	0.592333
ASV_967	Bacteria	Firmicutes	Clostridia	Clostridiales	Family_XIII	Family_XIII_UCG-001	NA	0.831465	0.899091	0.978406	0.991211			0.462364	0.768755
ASV_968	Bacteria	Firmicutes	Clostridia	Clostridiales	Lachnospiraceae	Lachnoclostridium	NA	0.375291	0.632834					0.900961	0.968029
ASV_969	Bacteria	Firmicutes	Clostridia	Clostridiales	Ruminococcaceae	Oscillibacter	NA							0.295918	0.656019	0.939198	0.987731
ASV_970	Bacteria	Proteobacteria	Alphaproteobacteria	Rhizobiales	Xanthobacteraceae	Bradyrhizobium	NA	0.320867	0.632834
ASV_971	Bacteria	Firmicutes	Clostridia	Clostridiales	Lachnospiraceae	Lachnospiraceae_NK4A136_group	NA	0.481983	0.632834
ASV_972	Bacteria	Firmicutes	Erysipelotrichia	Erysipelotrichales	Erysipelotrichaceae	NA	NA							0.689454	0.885125	0.897179	0.963993
ASV_973	Bacteria	Firmicutes	Clostridia	Clostridiales	Lachnospiraceae	Lachnospiraceae_NK4A136_group	NA					0.530537	0.773839	0.544914	0.811521	0.385089	0.731459
ASV_974	Bacteria	Firmicutes	Clostridia	Clostridiales	Lachnospiraceae	Lachnospiraceae_NK4A136_group	NA	0.338526	0.632834
ASV_975	Bacteria	Bacteroidetes	Bacteroidia	Bacteroidales	Rikenellaceae	Alistipes	NA	0.488724	0.633163
ASV_976	Bacteria	Bacteroidetes	Bacteroidia	Bacteroidales	Muribaculaceae	NA	NA	0.461268	0.632834
ASV_977	Bacteria	Firmicutes	Bacilli	Lactobacillales	Streptococcaceae	Streptococcus	NA	0.431709	0.632834
ASV_978	Bacteria	Firmicutes	Clostridia	Clostridiales	Lachnospiraceae	Lachnoclostridium	NA	0.445384	0.632834
ASV_979	Bacteria	Firmicutes	Clostridia	Clostridiales	Lachnospiraceae	Roseburia	NA			0.626453	0.91217					0.43365	0.767515
ASV_980	Bacteria	Firmicutes	Clostridia	Clostridiales	Ruminococcaceae	NA	NA
ASV_981	Bacteria	Firmicutes	Clostridia	Clostridiales	Ruminococcaceae	Anaerotruncus	NA							0.201814	0.605574	0.232903	0.585985
ASV_982	Bacteria	Firmicutes	Clostridia	Clostridiales	Lachnospiraceae	NA	NA							0.116529	0.489823	0.82964	0.944799
ASV_983	Bacteria	Bacteroidetes	Bacteroidia	Bacteroidales	Muribaculaceae	NA	NA	0.155429	0.632834
ASV_984	Eukaryota	NA	NA	NA	NA	NA	NA
ASV_985	Bacteria	Proteobacteria	Deltaproteobacteria	Desulfovibrionales	Desulfovibrionaceae	Desulfovibrio	NA	0.429884	0.632834
ASV_986	Bacteria	Firmicutes	Clostridia	Clostridiales	Ruminococcaceae	Ruminiclostridium_9	NA	0.135396	0.632834							0.0785379	0.517595
ASV_987	Bacteria	Bacteroidetes	Bacteroidia	Bacteroidales	Muribaculaceae	NA	NA	0.141747	0.632834
ASV_988	Bacteria	Firmicutes	Clostridia	Clostridiales	Ruminococcaceae	Ruminococcaceae_NK4A214_group	NA							0.00187007	0.15132	0.329244	0.675304
ASV_989	Bacteria	Firmicutes	Clostridia	Clostridiales	Lachnospiraceae	Lachnospiraceae_NK4A136_group	NA							0.739254	0.899426	0.948715	0.988894
ASV_990	Bacteria	Proteobacteria	Alphaproteobacteria	Rhizobiales	Xanthobacteraceae	Bradyrhizobium	NA	0.464663	0.632834
ASV_991	Bacteria	Firmicutes	Clostridia	Clostridiales	Ruminococcaceae	Ruminiclostridium_9	NA	0.429888	0.632834	0.151377	0.511438	0.738373	0.832864
ASV_992	Bacteria	Firmicutes	Clostridia	Clostridiales	Ruminococcaceae	Ruminiclostridium	NA	0.336711	0.632834
ASV_993	Bacteria	Firmicutes	Clostridia	Clostridiales	Lachnospiraceae	A2	NA							0.197613	0.605574
ASV_994	Bacteria	Firmicutes	Clostridia	Clostridiales	Ruminococcaceae	NA	NA	0.31377	0.632834					0.868971	0.952981
ASV_995	Bacteria	Bacteroidetes	Bacteroidia	Bacteroidales	Muribaculaceae	NA	NA	0.132493	0.632834
ASV_996	Bacteria	Firmicutes	Clostridia	Clostridiales	Lachnospiraceae	NA	NA	0.131066	0.632834			0.583022	0.773839	0.0715093	0.410121	0.578161	0.818402
ASV_997	Bacteria	Firmicutes	Clostridia	Clostridiales	Lachnospiraceae	NA	NA							0.535541	0.808555
ASV_998	Bacteria	Firmicutes	Clostridia	Clostridiales	Lachnospiraceae	NA	NA							0.809038	0.928577	0.789858	0.922198
ASV_999	Bacteria	Proteobacteria	Deltaproteobacteria	Desulfovibrionales	Desulfovibrionaceae	Desulfovibrio	NA	0.428771	0.632834
ASV_1000	Bacteria	Proteobacteria	Alphaproteobacteria	Rhizobiales	Xanthobacteraceae	Bradyrhizobium	NA	0.320997	0.632834
ASV_1001	Bacteria	Tenericutes	Mollicutes	Mollicutes_RF39	NA	NA	NA	0.151536	0.632834					0.162262	0.550897	0.131758	0.534961
ASV_1002	Bacteria	Firmicutes	Bacilli	Lactobacillales	Streptococcaceae	Streptococcus	NA	0.517105	0.652212
ASV_1003	Bacteria	Firmicutes	Clostridia	Clostridiales	Lachnospiraceae	NA	NA							0.508921	0.803694
ASV_1004	Bacteria	Bacteroidetes	Bacteroidia	Bacteroidales	Muribaculaceae	NA	NA	0.335976	0.632834
ASV_1005	Bacteria	Firmicutes	Bacilli	Lactobacillales	Lactobacillaceae	Lactobacillus	NA	0.50373	0.642335
ASV_1006	Bacteria	Proteobacteria	Alphaproteobacteria	Rhizobiales	Labraceae	Labrys	NA	0.385738	0.632834
ASV_1007	Bacteria	Firmicutes	Clostridia	Clostridiales	Lachnospiraceae	Lachnoclostridium	NA			0.113213	0.459184			0.247782	0.62943	0.468584	0.775616
ASV_1008	Bacteria	Firmicutes	Clostridia	Clostridiales	Lachnospiraceae	NA	NA							0.939614	0.977025
ASV_1009	Bacteria	Firmicutes	Clostridia	Clostridiales	Lachnospiraceae	Anaerostipes	NA					0.589443	0.773839	0.250004	0.62943
ASV_1010	Bacteria	Bacteroidetes	Bacteroidia	Bacteroidales	Muribaculaceae	NA	NA	0.469345	0.632834
ASV_1011	Bacteria	Bacteroidetes	Bacteroidia	Bacteroidales	Muribaculaceae	NA	NA	0.147721	0.632834
ASV_1012	Bacteria	Firmicutes	Clostridia	Clostridiales	Ruminococcaceae	NA	NA	0.375291	0.632834					0.413813	0.757866
ASV_1013	Bacteria	Firmicutes	Erysipelotrichia	Erysipelotrichales	Erysipelotrichaceae	NA	NA					0.45763	0.773839	0.543139	0.811521	0.525902	0.784189
ASV_1014	Bacteria	Firmicutes	Clostridia	Clostridiales	Lachnospiraceae	GCA-900066575	NA							0.722273	0.897504	0.672035	0.874776
ASV_1015	Bacteria	Firmicutes	Clostridia	Clostridiales	Lachnospiraceae	NA	NA							0.445834	0.76201
ASV_1016	Bacteria	Firmicutes	Erysipelotrichia	Erysipelotrichales	Erysipelotrichaceae	NA	NA							0.787273	0.919906	0.87292	0.955264
ASV_1017	Bacteria	Bacteroidetes	Bacteroidia	Bacteroidales	Prevotellaceae	Prevotella	NA
ASV_1018	Eukaryota	NA	NA	NA	NA	NA	NA
ASV_1019	Bacteria	Bacteroidetes	Bacteroidia	Chitinophagales	Chitinophagaceae	Vibrionimonas	NA	0.4959	0.635348
ASV_1020	Bacteria	Proteobacteria	Alphaproteobacteria	Rhizobiales	Xanthobacteraceae	Bradyrhizobium	NA	0.318619	0.632834
ASV_1021	Bacteria	Actinobacteria	Coriobacteriia	Coriobacteriales	Eggerthellaceae	NA	NA					0.791543	0.869204	0.687396	0.885125
ASV_1022	Eukaryota	NA	NA	NA	NA	NA	NA
ASV_1023	Bacteria	Bacteroidetes	Bacteroidia	Bacteroidales	Muribaculaceae	NA	NA	0.43607	0.632834
ASV_1024	Bacteria	Firmicutes	Clostridia	Clostridiales	Lachnospiraceae	NA	NA							0.915462	0.969371
ASV_1025	Bacteria	Firmicutes	Bacilli	Lactobacillales	Lactobacillaceae	Lactobacillus	NA	0.32151	0.632834
ASV_1026	Bacteria	Firmicutes	Clostridia	Clostridiales	Lachnospiraceae	NA	NA							0.430744	0.761995	0.709568	0.886793
ASV_1027	Eukaryota	NA	NA	NA	NA	NA	NA
ASV_1028	Bacteria	Firmicutes	Clostridia	Clostridiales	Lachnospiraceae	NA	NA	0.396849	0.632834					0.41347	0.757866
ASV_1029	Bacteria	Firmicutes	Clostridia	Clostridiales	Lachnospiraceae	GCA-900066575	NA					0.583022	0.773839	0.624909	0.868078
ASV_1030	Eukaryota	NA	NA	NA	NA	NA	NA
ASV_1031	Bacteria	Proteobacteria	Alphaproteobacteria	Rhizobiales	Xanthobacteraceae	Bradyrhizobium	NA	0.45359	0.632834
ASV_1032	Bacteria	Bacteroidetes	Bacteroidia	Bacteroidales	Muribaculaceae	NA	NA	0.161796	0.632834
ASV_1033	Bacteria	Firmicutes	Clostridia	Clostridiales	Ruminococcaceae	Ruminiclostridium_5	NA					0.530107	0.773839	0.911919	0.969371	0.109803	0.534961
ASV_1034	Bacteria	Firmicutes	Clostridia	Clostridiales	Lachnospiraceae	NA	NA							0.586024	0.849297	0.037224	0.489745
ASV_1035	Bacteria	Bacteroidetes	Bacteroidia	Bacteroidales	Muribaculaceae	NA	NA	0.436912	0.632834
ASV_1036	Bacteria	Firmicutes	Clostridia	Clostridiales	Clostridiales_vadinBB60_group	NA	NA			0.293947	0.659396			0.345704	0.708183	0.951094	0.988894
ASV_1037	Bacteria	Proteobacteria	Deltaproteobacteria	Desulfovibrionales	Desulfovibrionaceae	NA	NA	0.153023	0.632834
ASV_1038	Bacteria	Bacteroidetes	Bacteroidia	Chitinophagales	Chitinophagaceae	Vibrionimonas	NA	0.47276	0.632834
ASV_1039	Bacteria	Firmicutes	Clostridia	Clostridiales	Lachnospiraceae	Lachnospiraceae_NK4A136_group	NA	0.436912	0.632834
ASV_1040	Eukaryota	NA	NA	NA	NA	NA	NA
ASV_1041	Bacteria	Firmicutes	Clostridia	Clostridiales	Ruminococcaceae	Ruminococcaceae_UCG-004	NA			0.963739	0.991211			0.0424981	0.357505	0.880145	0.955264
ASV_1042	Eukaryota	NA	NA	NA	NA	NA	NA
ASV_1043	Bacteria	Bacteroidetes	Bacteroidia	Bacteroidales	Muribaculaceae	NA	NA	0.450891	0.632834
ASV_1044	Bacteria	Firmicutes	Clostridia	Clostridiales	Ruminococcaceae	Ruminococcaceae_UCG-005	NA							0.597453	0.85474	0.962182	0.988894
ASV_1045	Bacteria	Firmicutes	Clostridia	Clostridiales	Lachnospiraceae	NA	NA	0.439687	0.632834
ASV_1046	Bacteria	Bacteroidetes	Bacteroidia	Bacteroidales	Muribaculaceae	NA	NA	0.321259	0.632834
ASV_1047	Bacteria	Firmicutes	Clostridia	Clostridiales	Ruminococcaceae	Ruminococcaceae_UCG-014	NA							0.418061	0.761607	0.891688	0.962316
ASV_1048	Bacteria	Bacteroidetes	Bacteroidia	Bacteroidales	Muribaculaceae	NA	NA	0.333436	0.632834
ASV_1049	Bacteria	Firmicutes	Clostridia	Clostridiales	Family_XIII	Anaerovorax	NA	0.43607	0.632834
ASV_1050	Bacteria	Bacteroidetes	Bacteroidia	Bacteroidales	Muribaculaceae	NA	NA	0.476872	0.632834
ASV_1051	Bacteria	Firmicutes	Bacilli	Lactobacillales	Lactobacillaceae	Lactobacillus	NA	0.130494	0.632834
ASV_1052	Bacteria	Firmicutes	Clostridia	Clostridiales	Lachnospiraceae	Lachnospiraceae_NK4A136_group	NA	0.147721	0.632834
ASV_1053	Bacteria	Firmicutes	Clostridia	Clostridiales	Lachnospiraceae	NA	NA	0.972626	0.984769			0.550227	0.773839	0.302642	0.660372
ASV_1054	Bacteria	Actinobacteria	Coriobacteriia	Coriobacteriales	Eggerthellaceae	Denitrobacterium	NA					0.555538	0.773839	0.0676508	0.400542
ASV_1055	Bacteria	Firmicutes	Clostridia	Clostridiales	Lachnospiraceae	Lachnospiraceae_NK4A136_group	NA	0.433755	0.632834
ASV_1056	Bacteria	Firmicutes	Clostridia	Clostridiales	Lachnospiraceae	Lachnospiraceae_NK4A136_group	NA	0.479	0.632834
ASV_1057	Bacteria	Firmicutes	Clostridia	Clostridiales	Ruminococcaceae	Ruminiclostridium_9	NA							0.275164	0.64615	0.572606	0.815593
ASV_1058	Bacteria	Bacteroidetes	Bacteroidia	Chitinophagales	Chitinophagaceae	Vibrionimonas	NA	0.517105	0.652212
ASV_1059	Bacteria	Firmicutes	Clostridia	Clostridiales	Eubacteriaceae	Anaerofustis	NA			0.178447	0.538654			0.217845	0.611954
ASV_1060	Bacteria	Firmicutes	Clostridia	Clostridiales	Lachnospiraceae	NA	NA							0.617808	0.866896
ASV_1061	Bacteria	Firmicutes	Clostridia	Clostridiales	Lachnospiraceae	A2	NA			0.665533	0.91217	0.608385	0.773839	0.208315	0.605574	0.682637	0.878031
ASV_1062	Bacteria	Firmicutes	Clostridia	Clostridiales	Lachnospiraceae	NA	NA							0.525142	0.808555	0.999615	0.999909
ASV_1063	Bacteria	Firmicutes	Clostridia	Clostridiales	Lachnospiraceae	GCA-900066575	NA	0.448167	0.632834
ASV_1064	Bacteria	Firmicutes	Clostridia	Clostridiales	Lachnospiraceae	NA	NA							0.457383	0.76721	0.848328	0.953892
ASV_1065	Bacteria	Firmicutes	Clostridia	Clostridiales	Ruminococcaceae	NA	NA							0.499402	0.796255	0.963726	0.988894
ASV_1066	Bacteria	Firmicutes	Clostridia	Clostridiales	Family_XIII	Family_XIII_AD3011_group	NA							0.538631	0.808555	0.832219	0.946323
ASV_1067	Bacteria	Bacteroidetes	Bacteroidia	Chitinophagales	Chitinophagaceae	Vibrionimonas	NA	0.290729	0.632834
ASV_1068	Bacteria	Proteobacteria	Deltaproteobacteria	Desulfovibrionales	Desulfovibrionaceae	Desulfovibrio	NA	0.336168	0.632834
ASV_1069	Bacteria	Firmicutes	Clostridia	Clostridiales	Ruminococcaceae	Ruminiclostridium	NA			0.198823	0.559555			0.944273	0.978636	0.562563	0.807412
ASV_1070	Eukaryota	NA	NA	NA	NA	NA	NA
ASV_1071	Bacteria	Firmicutes	Clostridia	Clostridiales	Ruminococcaceae	NA	NA							0.338278	0.700358	0.499327	0.779114
ASV_1072	Bacteria	Firmicutes	Erysipelotrichia	Erysipelotrichales	Erysipelotrichaceae	Faecalibaculum	NA	0.144812	0.632834
ASV_1073	Bacteria	Firmicutes	Clostridia	Clostridiales	Ruminococcaceae	Oscillibacter	NA	0.483794	0.632834			0.457806	0.773839	0.509213	0.803694	0.592713	0.829798
ASV_1074	Bacteria	Firmicutes	Clostridia	Clostridiales	Lachnospiraceae	Lachnospiraceae_NK4A136_group	NA	0.324227	0.632834
ASV_1075	Bacteria	Firmicutes	Clostridia	Clostridiales	Ruminococcaceae	Ruminococcaceae_UCG-014	NA			0.0671367	0.459184	0.653954	0.796237	0.961797	0.983058
ASV_1076	Bacteria	Firmicutes	Clostridia	Clostridiales	Ruminococcaceae	Ruminiclostridium_9	NA							0.84747	0.947034	0.247492	0.597583
ASV_1077	Bacteria	Firmicutes	Clostridia	Clostridiales	Clostridiales_vadinBB60_group	NA	NA	0.577708	0.698243					0.248024	0.62943	0.620823	0.853492
ASV_1078	Bacteria	Proteobacteria	Alphaproteobacteria	Rhizobiales	Xanthobacteraceae	Bradyrhizobium	NA	0.334702	0.632834
ASV_1079	Bacteria	Firmicutes	Clostridia	Clostridiales	Lachnospiraceae	NA	NA					0.604031	0.773839	0.666872	0.882197	0.436089	0.767515
ASV_1080	Bacteria	Firmicutes	Clostridia	Clostridiales	Ruminococcaceae	NA	NA			0.0746884	0.459184			0.324171	0.68576
ASV_1081	Bacteria	Firmicutes	Clostridia	Clostridiales	Ruminococcaceae	Oscillibacter	NA							0.77474	0.914165	0.958233	0.988894
ASV_1082	Bacteria	Firmicutes	Clostridia	Clostridiales	Lachnospiraceae	NA	NA	0.33585	0.632834
ASV_1083	Bacteria	Firmicutes	Clostridia	Clostridiales	Lachnospiraceae	NA	NA	0.321683	0.632834
ASV_1084	Bacteria	Firmicutes	Clostridia	Clostridiales	Lachnospiraceae	NA	NA							0.0740886	0.41512	0.884094	0.956828
ASV_1085	Bacteria	Proteobacteria	Alphaproteobacteria	Rhizobiales	Xanthobacteraceae	Afipia	NA	0.294061	0.632834
ASV_1086	Bacteria	Firmicutes	Clostridia	Clostridiales	Lachnospiraceae	Lachnoclostridium	NA							0.621902	0.86777
ASV_1087	Bacteria	Firmicutes	Clostridia	Clostridiales	Ruminococcaceae	Ruminococcaceae_UCG-014	NA							0.0718029	0.410121	0.192228	0.564114
ASV_1088	Bacteria	Bacteroidetes	Bacteroidia	Bacteroidales	Muribaculaceae	NA	NA	0.45309	0.632834
ASV_1089	Bacteria	Firmicutes	Clostridia	Clostridiales	Lachnospiraceae	NA	NA							0.141163	0.533343
ASV_1090	Bacteria	Firmicutes	Clostridia	Clostridiales	Lachnospiraceae	Lachnoclostridium	NA			0.570498	0.91164	0.272903	0.773839	0.144448	0.533747
ASV_1091	Bacteria	Bacteroidetes	Bacteroidia	Bacteroidales	Muribaculaceae	NA	NA	0.141747	0.632834
ASV_1092	Bacteria	Cyanobacteria	Melainabacteria	Gastranaerophilales	NA	NA	NA			0.10498	0.459184	0.612955	0.773839			0.800564	0.922704
ASV_1093	Bacteria	Bacteroidetes	Bacteroidia	Flavobacteriales	Weeksellaceae	Cloacibacterium	NA	0.319025	0.632834
ASV_1094	Bacteria	Bacteroidetes	Bacteroidia	Bacteroidales	Muribaculaceae	NA	NA	0.132493	0.632834
ASV_1095	Bacteria	Firmicutes	Clostridia	Clostridiales	Lachnospiraceae	Lachnospiraceae_FCS020_group	NA	0.457022	0.632834
ASV_1096	Bacteria	Firmicutes	Clostridia	Clostridiales	Ruminococcaceae	Ruminococcaceae_NK4A214_group	NA							0.193986	0.601896	0.858878	0.953892
ASV_1097	Bacteria	Firmicutes	Clostridia	Clostridiales	Lachnospiraceae	NA	NA					0.436941	0.773839	0.15304	0.536468	0.148639	0.534961
ASV_1098	Bacteria	Actinobacteria	Actinobacteria	Bifidobacteriales	Bifidobacteriaceae	Bifidobacterium	animalis					0.589443	0.773839
ASV_1099	Bacteria	Bacteroidetes	Bacteroidia	Bacteroidales	Muribaculaceae	NA	NA	0.135396	0.632834
ASV_1100	Bacteria	Firmicutes	Clostridia	Clostridiales	Ruminococcaceae	Phocea	NA	0.396849	0.632834					0.762864	0.910001	0.57921	0.818402
ASV_1101	Bacteria	Bacteroidetes	Bacteroidia	Bacteroidales	Muribaculaceae	NA	NA	0.334702	0.632834
ASV_1102	Bacteria	Firmicutes	Clostridia	Clostridiales	Lachnospiraceae	Lachnospiraceae_NK4A136_group	NA							0.680015	0.885125
ASV_1103	Bacteria	Firmicutes	Clostridia	Clostridiales	Ruminococcaceae	Anaerotruncus	NA							0.740355	0.899426
ASV_1104	Bacteria	Firmicutes	Clostridia	Clostridiales	Clostridiales_vadinBB60_group	NA	NA							0.376044	0.729469	0.45065	0.767515
ASV_1105	Bacteria	Proteobacteria	Alphaproteobacteria	Rhizobiales	Xanthobacteraceae	Afipia	NA	0.351536	0.632834
ASV_1106	Bacteria	Firmicutes	Clostridia	Clostridiales	Lachnospiraceae	NA	NA	0.324227	0.632834	0.053595	0.459184
ASV_1107	Bacteria	Firmicutes	Clostridia	Clostridiales	Lachnospiraceae	NA	NA			0.16212	0.521651	0.555538	0.773839
ASV_1108	Bacteria	Bacteroidetes	Bacteroidia	Bacteroidales	Muribaculaceae	NA	NA	0.130494	0.632834
ASV_1109	Bacteria	Firmicutes	Clostridia	Clostridiales	Lachnospiraceae	Lachnoclostridium	NA	0.483794	0.632834					0.250216	0.62943
ASV_1110	Bacteria	Firmicutes	Clostridia	Clostridiales	Lachnospiraceae	NA	NA							0.597702	0.85474
ASV_1111	Bacteria	Firmicutes	Clostridia	Clostridiales	Ruminococcaceae	Oscillibacter	NA							0.521595	0.808555	0.499327	0.779114
ASV_1112	Bacteria	Firmicutes	Clostridia	Clostridiales	Lachnospiraceae	Lachnospiraceae_FCS020_group	NA	0.331105	0.632834							0.780308	0.918943
ASV_1113	Bacteria	Firmicutes	Clostridia	Clostridiales	Lachnospiraceae	NA	NA							0.110977	0.482001	0.858878	0.953892
ASV_1114	Eukaryota	NA	NA	NA	NA	NA	NA
ASV_1115	Bacteria	Firmicutes	Clostridia	Clostridiales	Lachnospiraceae	NA	NA	0.429888	0.632834	0.0552784	0.459184	0.844766	0.903775	0.333368	0.693466
ASV_1116	Bacteria	Firmicutes	Clostridia	Clostridiales	Lachnospiraceae	Lachnoclostridium	NA			0.0379019	0.459184	0.510685	0.773839
ASV_1117	Bacteria	Firmicutes	Clostridia	Clostridiales	NA	NA	NA							0.605848	0.861316	0.323433	0.673462
ASV_1118	Bacteria	Bacteroidetes	Bacteroidia	Chitinophagales	Chitinophagaceae	Sediminibacterium	NA	0.334702	0.632834
ASV_1119	Bacteria	Firmicutes	Clostridia	Clostridiales	Ruminococcaceae	NA	NA	0.324172	0.632834	0.674967	0.91217			0.813814	0.930254	0.320256	0.669468
ASV_1120	Bacteria	Firmicutes	Clostridia	Clostridiales	Ruminococcaceae	Ruminiclostridium_9	NA							0.422415	0.761995	0.0119716	0.383534
ASV_1121	Bacteria	Firmicutes	Clostridia	Clostridiales	Lachnospiraceae	NA	NA	0.13858	0.632834
ASV_1122	Bacteria	Firmicutes	Clostridia	Clostridiales	Lachnospiraceae	NA	NA			0.0522268	0.459184			0.654055	0.877151	0.994629	0.999909
ASV_1123	Bacteria	Firmicutes	Clostridia	Clostridiales	Clostridiales_vadinBB60_group	NA	NA							0.0768377	0.419154	0.0718892	0.489745
ASV_1124	Bacteria	Firmicutes	Clostridia	Clostridiales	Lachnospiraceae	NA	NA							0.0316214	0.333743
ASV_1125	Bacteria	Firmicutes	Clostridia	Clostridiales	Lachnospiraceae	ASF356	NA							0.086343	0.42761	0.104121	0.534961
ASV_1126	Bacteria	Firmicutes	Clostridia	Clostridiales	Lachnospiraceae	Lachnospiraceae_UCG-006	NA	0.527681	0.659398
ASV_1127	Bacteria	Firmicutes	Clostridia	Clostridiales	Family_XIII	NA	NA					0.437093	0.773839	0.290961	0.650584
ASV_1128	Bacteria	Firmicutes	Clostridia	Clostridiales	Lachnospiraceae	NA	NA							0.175717	0.575311
ASV_1129	Bacteria	Firmicutes	Clostridia	Clostridiales	Lachnospiraceae	Lachnospiraceae_NK4A136_group	NA							0.773343	0.914165
ASV_1130	Bacteria	Bacteroidetes	Bacteroidia	Bacteroidales	Bacteroidaceae	Bacteroides	NA	0.13858	0.632834
ASV_1131	Bacteria	Firmicutes	Clostridia	Clostridiales	Ruminococcaceae	Oscillibacter	NA							0.876483	0.954086	0.516266	0.779247
ASV_1132	Eukaryota	NA	NA	NA	NA	NA	NA
ASV_1133	Bacteria	Firmicutes	Clostridia	Clostridiales	Lachnospiraceae	Lachnoclostridium	NA							0.723795	0.897504
ASV_1134	Bacteria	Firmicutes	Clostridia	Clostridiales	Clostridiales_vadinBB60_group	NA	NA			0.707902	0.914856			0.554671	0.817278	0.507559	0.779247
ASV_1135	Eukaryota	NA	NA	NA	NA	NA	NA
ASV_1136	Bacteria	Firmicutes	Clostridia	Clostridiales	Lachnospiraceae	GCA-900066575	NA							0.390477	0.743437	0.530984	0.784189
ASV_1137	Bacteria	Firmicutes	Clostridia	Clostridiales	Lachnospiraceae	NA	NA							0.177328	0.577804	0.0783356	0.517595
ASV_1138	Eukaryota	NA	NA	NA	NA	NA	NA
ASV_1139	Eukaryota	NA	NA	NA	NA	NA	NA
ASV_1140	Bacteria	Firmicutes	Clostridia	Clostridiales	Lachnospiraceae	Roseburia	NA			0.126153	0.473575			0.391661	0.744232
ASV_1141	Bacteria	Bacteroidetes	Bacteroidia	Bacteroidales	Muribaculaceae	NA	NA	0.135396	0.632834
ASV_1142	Bacteria	Firmicutes	Clostridia	Clostridiales	Lachnospiraceae	Lachnospiraceae_UCG-001	NA							0.983326	0.99667	0.948819	0.988894
ASV_1143	Bacteria	Firmicutes	Clostridia	Clostridiales	Lachnospiraceae	Lachnospiraceae_NK4A136_group	NA							0.594546	0.854	0.740392	0.90823
ASV_1144	Bacteria	Bacteroidetes	Bacteroidia	Bacteroidales	Rikenellaceae	Alistipes	NA							0.360134	0.720544	0.709395	0.886793
ASV_1145	Bacteria	Firmicutes	Clostridia	Clostridiales	Lachnospiraceae	NA	NA	0.34982	0.632834							0.216679	0.581722
ASV_1146	Bacteria	Firmicutes	Clostridia	Clostridiales	Lachnospiraceae	Lachnospiraceae_UCG-001	NA							0.261799	0.635267
ASV_1147	Bacteria	Firmicutes	Clostridia	Clostridiales	Ruminococcaceae	Ruminococcaceae_UCG-014	NA					0.583022	0.773839			0.568113	0.811742
ASV_1148	Bacteria	Firmicutes	Clostridia	Clostridiales	Lachnospiraceae	Lachnospiraceae_NK4A136_group	NA							0.00124981	0.121357	0.0387606	0.489745
ASV_1149	Bacteria	Firmicutes	Clostridia	Clostridiales	Lachnospiraceae	NA	NA							0.0302564	0.333743
ASV_1150	Bacteria	Firmicutes	Clostridia	Clostridiales	Ruminococcaceae	Ruminococcaceae_UCG-014	NA	0.577708	0.698243
ASV_1151	Bacteria	Proteobacteria	Alphaproteobacteria	Rhizobiales	Xanthobacteraceae	Bradyrhizobium	NA	0.520388	0.653305
ASV_1152	Bacteria	Firmicutes	Clostridia	Clostridiales	Lachnospiraceae	Lachnospiraceae_NK4A136_group	NA							0.467112	0.768755	0.714372	0.886793
ASV_1153	Bacteria	Proteobacteria	Alphaproteobacteria	Rhizobiales	Xanthobacteraceae	Bradyrhizobium	NA
ASV_1154	Eukaryota	NA	NA	NA	NA	NA	NA
ASV_1155	Eukaryota	NA	NA	NA	NA	NA	NA
ASV_1156	Bacteria	Firmicutes	Clostridia	Clostridiales	Ruminococcaceae	NA	NA							0.924241	0.971253
ASV_1157	Eukaryota	NA	NA	NA	NA	NA	NA
ASV_1158	Eukaryota	NA	NA	NA	NA	NA	NA
ASV_1159	Bacteria	Firmicutes	Clostridia	Clostridiales	Lachnospiraceae	NA	NA	0.131066	0.632834
ASV_1160	Bacteria	Firmicutes	Clostridia	Clostridiales	Lachnospiraceae	Roseburia	NA					0.307345	0.773839	0.0979455	0.468498	0.931605	0.984508
ASV_1161	Bacteria	Firmicutes	Clostridia	Clostridiales	Lachnospiraceae	Lachnospiraceae_NK4A136_group	NA	0.506582	0.644957
ASV_1162	Bacteria	Bacteroidetes	Bacteroidia	Bacteroidales	Muribaculaceae	Muribaculum	NA	0.512363	0.64926
ASV_1163	Bacteria	Firmicutes	Clostridia	Clostridiales	Lachnospiraceae	ASF356	NA							0.0847319	0.42761
ASV_1164	Bacteria	Firmicutes	Clostridia	Clostridiales	Lachnospiraceae	A2	NA			0.665533	0.91217			0.272926	0.64323	0.148639	0.534961
ASV_1165	Bacteria	Firmicutes	Erysipelotrichia	Erysipelotrichales	Erysipelotrichaceae	Faecalibaculum	NA	0.115895	0.632834
ASV_1166	Bacteria	Firmicutes	Clostridia	Clostridiales	Ruminococcaceae	Ruminococcaceae_UCG-014	NA					0.949526	0.974363	0.171882	0.573529	0.386179	0.731459
ASV_1167	Bacteria	Firmicutes	Bacilli	Lactobacillales	Enterococcaceae	Enterococcus	NA	0.499017	0.638332
ASV_1168	Bacteria	Firmicutes	Clostridia	Clostridiales	Lachnospiraceae	Lachnospiraceae_NK4A136_group	NA	0.467175	0.632834
ASV_1169	Bacteria	Firmicutes	Clostridia	Clostridiales	Lachnospiraceae	Lachnospiraceae_NK4A136_group	NA	0.454981	0.632834
ASV_1170	Bacteria	Firmicutes	Clostridia	Clostridiales	Ruminococcaceae	NA	NA							0.380887	0.729469	0.232903	0.585985
ASV_1171	Bacteria	Bacteroidetes	Bacteroidia	Bacteroidales	Muribaculaceae	NA	NA	0.135396	0.632834
ASV_1172	Bacteria	Firmicutes	Clostridia	Clostridiales	Ruminococcaceae	Ruminiclostridium_9	NA	0.115895	0.632834					0.769482	0.914165
ASV_1173	Bacteria	Firmicutes	Clostridia	Clostridiales	Lachnospiraceae	NA	NA	0.34982	0.632834
ASV_1174	Bacteria	Firmicutes	Clostridia	Clostridiales	Lachnospiraceae	Lachnoclostridium	NA	0.141747	0.632834
ASV_1175	Bacteria	Firmicutes	Clostridia	Clostridiales	Lachnospiraceae	Lachnospiraceae_UCG-001	NA							0.440335	0.76201	0.682637	0.878031
ASV_1176	Bacteria	Firmicutes	Bacilli	Lactobacillales	Lactobacillaceae	Lactobacillus	NA	0.559404	0.69158
ASV_1177	Bacteria	Firmicutes	Clostridia	Clostridiales	Lachnospiraceae	Lachnoclostridium	NA							0.997854	0.999409
ASV_1178	Eukaryota	NA	NA	NA	NA	NA	NA
ASV_1179	Bacteria	Bacteroidetes	Bacteroidia	Bacteroidales	Muribaculaceae	NA	NA	0.135396	0.632834
ASV_1180	Bacteria	Firmicutes	Clostridia	Clostridiales	Lachnospiraceae	NA	NA	0.293401	0.632834					0.90617	0.969371	0.220307	0.581722
ASV_1181	Bacteria	Firmicutes	Clostridia	Clostridiales	Lachnospiraceae	Lachnospiraceae_NK4A136_group	NA	0.457022	0.632834
ASV_1182	Bacteria	Firmicutes	Clostridia	Clostridiales	Ruminococcaceae	Ruminococcaceae_UCG-014	NA							0.544526	0.811521
ASV_1183	Bacteria	Bacteroidetes	Bacteroidia	Bacteroidales	Muribaculaceae	NA	NA	0.135396	0.632834
ASV_1184	Bacteria	Firmicutes	Clostridia	Clostridiales	Family_XIII	Family_XIII_AD3011_group	NA							0.631908	0.872519	0.108762	0.534961
ASV_1185	Eukaryota	NA	NA	NA	NA	NA	NA
ASV_1186	Eukaryota	NA	NA	NA	NA	NA	NA
ASV_1187	Bacteria	Firmicutes	Clostridia	Clostridiales	Lachnospiraceae	NA	NA					0.370185	0.773839	0.429965	0.761995	0.378661	0.726498
ASV_1188	Bacteria	Firmicutes	Clostridia	Clostridiales	Ruminococcaceae	Ruminococcus_1	NA			0.0996047	0.459184			0.856317	0.94714	0.48649	0.779114
ASV_1189	Bacteria	Actinobacteria	Coriobacteriia	Coriobacteriales	Eggerthellaceae	Enterorhabdus	caecimuris
ASV_1190	Bacteria	Firmicutes	Clostridia	Clostridiales	Ruminococcaceae	NA	NA	0.324227	0.632834			0.612955	0.773839
ASV_1191	Bacteria	Firmicutes	Clostridia	Clostridiales	Ruminococcaceae	Ruminiclostridium	NA			0.0859508	0.459184					0.6733	0.874776
ASV_1192	Bacteria	Firmicutes	Clostridia	Clostridiales	Clostridiales_vadinBB60_group	NA	NA	0.151536	0.632834							0.798916	0.922198
ASV_1193	Bacteria	Firmicutes	Clostridia	Clostridiales	Lachnospiraceae	NA	NA									0.171302	0.536282
ASV_1194	Bacteria	Bacteroidetes	Bacteroidia	Bacteroidales	Muribaculaceae	NA	NA	0.457022	0.632834
ASV_1195	Bacteria	Firmicutes	Clostridia	Clostridiales	Ruminococcaceae	Butyricicoccus	NA							0.35816	0.7201
ASV_1196	Bacteria	Firmicutes	Clostridia	Clostridiales	Lachnospiraceae	NA	NA	0.130494	0.632834
ASV_1197	Bacteria	Firmicutes	Clostridia	Clostridiales	Lachnospiraceae	Blautia	NA
ASV_1198	Bacteria	Firmicutes	Clostridia	Clostridiales	Lachnospiraceae	NA	NA							0.859898	0.949262	0.670252	0.874776
ASV_1199	Bacteria	Proteobacteria	Alphaproteobacteria	Rhizobiales	Xanthobacteraceae	Bradyrhizobium	NA	0.330849	0.632834
ASV_1200	Bacteria	Firmicutes	Clostridia	Clostridiales	Lachnospiraceae	NA	NA							0.459852	0.76721	0.613593	0.846603
ASV_1201	Bacteria	Firmicutes	Clostridia	Clostridiales	Lachnospiraceae	NA	NA							0.993633	0.999409	0.880145	0.955264
ASV_1202	Bacteria	Actinobacteria	Coriobacteriia	Coriobacteriales	Eggerthellaceae	DNF00809	NA					0.47324	0.773839
ASV_1203	Bacteria	Bacteroidetes	Bacteroidia	Bacteroidales	Muribaculaceae	NA	NA	0.130494	0.632834
ASV_1204	Bacteria	Firmicutes	Clostridia	Clostridiales	Clostridiales_vadinBB60_group	NA	NA			0.143722	0.499856			0.617673	0.866896	0.753933	0.918943
ASV_1205	Bacteria	Firmicutes	Clostridia	Clostridiales	Ruminococcaceae	Ruminiclostridium_5	NA	0.396849	0.632834					0.915093	0.969371
ASV_1206	Bacteria	Bacteroidetes	Bacteroidia	Bacteroidales	Rikenellaceae	Alistipes	NA	0.331105	0.632834
ASV_1207	Bacteria	Bacteroidetes	Bacteroidia	Bacteroidales	Rikenellaceae	Alistipes	NA	0.556767	0.690285
ASV_1208	Bacteria	Firmicutes	Clostridia	Clostridiales	Ruminococcaceae	Ruminococcaceae_UCG-014	NA			0.0443476	0.459184	0.504879	0.773839	0.14631	0.533747	0.0207979	0.453382
ASV_1209	Bacteria	Bacteroidetes	Bacteroidia	Bacteroidales	Muribaculaceae	NA	NA	0.331105	0.632834
ASV_1210	Bacteria	Proteobacteria	Gammaproteobacteria	Pasteurellales	Pasteurellaceae	Muribacter	NA	0.322159	0.632834
ASV_1211	Bacteria	Firmicutes	Clostridia	Clostridiales	Ruminococcaceae	Ruminiclostridium	NA					0.383038	0.773839	0.683457	0.885125
ASV_1212	Bacteria	Firmicutes	Clostridia	Clostridiales	Ruminococcaceae	NA	NA									0.510631	0.779247
ASV_1213	Bacteria	Firmicutes	Clostridia	Clostridiales	Ruminococcaceae	NA	NA	0.331105	0.632834
ASV_1214	Bacteria	Firmicutes	Clostridia	Clostridiales	Lachnospiraceae	NA	NA							0.134464	0.526872
ASV_1215	Bacteria	Bacteroidetes	Bacteroidia	Bacteroidales	Muribaculaceae	NA	NA	0.144812	0.632834
ASV_1216	Bacteria	Firmicutes	Clostridia	Clostridiales	Lachnospiraceae	Lachnospiraceae_NK4A136_group	NA	0.459235	0.632834
ASV_1217	Bacteria	Firmicutes	Clostridia	Clostridiales	Lachnospiraceae	NA	NA	0.115895	0.632834
ASV_1218	Bacteria	Firmicutes	Clostridia	Clostridiales	Lachnospiraceae	NA	NA							0.178727	0.579646
ASV_1219	Bacteria	Firmicutes	Clostridia	Clostridiales	Lachnospiraceae	NA	NA							0.90214	0.968029	0.791577	0.922198
ASV_1220	Bacteria	Bacteroidetes	Bacteroidia	Bacteroidales	Rikenellaceae	Alistipes	NA	0.526326	0.65872
ASV_1221	Bacteria	Firmicutes	Clostridia	Clostridiales	Lachnospiraceae	Lachnospiraceae_NK4A136_group	NA					0.468864	0.773839	0.34818	0.71042	0.857036	0.953892
ASV_1222	Bacteria	Firmicutes	Clostridia	Clostridiales	Ruminococcaceae	NA	NA							0.284792	0.650584
ASV_1223	Bacteria	Firmicutes	Clostridia	Clostridiales	Lachnospiraceae	NA	NA							0.0616879	0.399368	0.670252	0.874776
ASV_1224	Bacteria	Firmicutes	Clostridia	Clostridiales	Ruminococcaceae	Ruminococcaceae_NK4A214_group	NA							0.538118	0.808555	0.508913	0.779247
ASV_1225	Bacteria	Firmicutes	Clostridia	Clostridiales	Lachnospiraceae	NA	NA	0.360464	0.632834
ASV_1226	Bacteria	Firmicutes	Clostridia	Clostridiales	Ruminococcaceae	NA	NA							0.398868	0.74481
ASV_1227	Bacteria	Firmicutes	Clostridia	Clostridiales	Lachnospiraceae	NA	NA
ASV_1228	Bacteria	Firmicutes	Clostridia	Clostridiales	Lachnospiraceae	NA	NA			0.0746884	0.459184			0.554637	0.817278	0.516266	0.779247
ASV_1229	Bacteria	Firmicutes	Clostridia	Clostridiales	Ruminococcaceae	Butyricicoccus	NA	0.526326	0.65872
ASV_1230	Bacteria	Cyanobacteria	Melainabacteria	Gastranaerophilales	NA	NA	NA
ASV_1231	Bacteria	Firmicutes	Clostridia	Clostridiales	Lachnospiraceae	NA	NA	0.151536	0.632834
ASV_1232	Bacteria	Bacteroidetes	Bacteroidia	Bacteroidales	Muribaculaceae	NA	NA
ASV_1233	Bacteria	Firmicutes	Clostridia	Clostridiales	Lachnospiraceae	NA	NA					0.583022	0.773839	0.527294	0.808555
ASV_1234	Bacteria	Actinobacteria	Coriobacteriia	Coriobacteriales	Eggerthellaceae	NA	NA	0.577708	0.698243	0.270878	0.647097	0.335646	0.773839
ASV_1235	Bacteria	Firmicutes	Clostridia	Clostridiales	Ruminococcaceae	Ruminiclostridium_5	NA	0.34982	0.632834
ASV_1236	Bacteria	Firmicutes	Clostridia	Clostridiales	Lachnospiraceae	Lachnospiraceae_UCG-006	NA			0.644483	0.91217			0.0986339	0.469478
ASV_1237	Bacteria	Firmicutes	Clostridia	Clostridiales	Clostridiales_vadinBB60_group	NA	NA			0.157284	0.516635			0.648329	0.87353	0.984417	0.999274
ASV_1238	Bacteria	Firmicutes	Clostridia	Clostridiales	Lachnospiraceae	NA	NA	0.31545	0.632834
ASV_1239	Bacteria	Firmicutes	Clostridia	Clostridiales	Ruminococcaceae	Ruminiclostridium_9	NA							0.161042	0.550439
ASV_1240	Bacteria	Firmicutes	Bacilli	Lactobacillales	Lactobacillaceae	Lactobacillus	NA	0.132493	0.632834
ASV_1241	Bacteria	Firmicutes	Erysipelotrichia	Erysipelotrichales	Erysipelotrichaceae	Faecalibaculum	NA	0.132493	0.632834
ASV_1242	Bacteria	Firmicutes	Clostridia	Clostridiales	Lachnospiraceae	NA	NA	0.135396	0.632834
ASV_1243	Bacteria	Firmicutes	Clostridia	Clostridiales	Ruminococcaceae	Ruminiclostridium_5	NA	0.396849	0.632834							0.0532033	0.489745
ASV_1244	Bacteria	Firmicutes	Clostridia	Clostridiales	Lachnospiraceae	Marvinbryantia	NA							0.620878	0.86777	0.0207979	0.453382
ASV_1245	Bacteria	Firmicutes	Clostridia	Clostridiales	Ruminococcaceae	Ruminiclostridium_5	NA	0.268401	0.632834					0.510123	0.803694	0.763528	0.918943
ASV_1246	Bacteria	Firmicutes	Clostridia	Clostridiales	Lachnospiraceae	NA	NA	0.132493	0.632834
ASV_1247	Bacteria	Firmicutes	Clostridia	Clostridiales	Lachnospiraceae	NA	NA			0.674967	0.91217			0.568016	0.831891
ASV_1248	Bacteria	Actinobacteria	Coriobacteriia	Coriobacteriales	Eggerthellaceae	Enterorhabdus	NA					0.906387	0.945372	0.435272	0.761995
ASV_1249	Bacteria	Bacteroidetes	Bacteroidia	Bacteroidales	Muribaculaceae	NA	NA	0.130494	0.632834
ASV_1250	Bacteria	Firmicutes	Clostridia	Clostridiales	Lachnospiraceae	NA	NA	0.132493	0.632834
ASV_1251	Bacteria	Firmicutes	Bacilli	Lactobacillales	Lactobacillaceae	Lactobacillus	NA	0.115895	0.632834
ASV_1252	Bacteria	Bacteroidetes	Bacteroidia	Bacteroidales	Muribaculaceae	NA	NA	0.328722	0.632834
ASV_1253	Bacteria	Firmicutes	Clostridia	Clostridiales	Lachnospiraceae	ASF356	NA							0.0730867	0.4126
ASV_1254	Bacteria	Firmicutes	Bacilli	Lactobacillales	Aerococcaceae	Aerococcus	NA
ASV_1255	Bacteria	Firmicutes	Bacilli	Lactobacillales	Streptococcaceae	Streptococcus	NA	0.130494	0.632834
ASV_1256	Bacteria	Proteobacteria	Deltaproteobacteria	Desulfovibrionales	Desulfovibrionaceae	NA	NA
ASV_1257	Bacteria	Firmicutes	Clostridia	Clostridiales	Ruminococcaceae	Oscillibacter	NA
ASV_1258	Bacteria	Bacteroidetes	Bacteroidia	Chitinophagales	Chitinophagaceae	Sediminibacterium	NA	0.323209	0.632834
ASV_1259	Bacteria	Firmicutes	Clostridia	Clostridiales	Ruminococcaceae	Oscillibacter	NA	0.577708	0.698243					0.420835	0.761995
ASV_1260	Eukaryota	NA	NA	NA	NA	NA	NA
ASV_1261	Bacteria	Firmicutes	Bacilli	Lactobacillales	Lactobacillaceae	Lactobacillus	NA	0.268401	0.632834
ASV_1262	Bacteria	Firmicutes	Clostridia	Clostridiales	Lachnospiraceae	NA	NA					0.583022	0.773839			0.657349	0.874776
ASV_1263	Bacteria	Firmicutes	Clostridia	Clostridiales	Clostridiales_vadinBB60_group	NA	NA									0.309144	0.658875
ASV_1264	Bacteria	Firmicutes	Clostridia	Clostridiales	Lachnospiraceae	NA	NA					0.469848	0.773839	0.944501	0.978636
ASV_1265	Bacteria	Firmicutes	Clostridia	Clostridiales	Ruminococcaceae	Ruminiclostridium_9	NA							0.636174	0.873106
ASV_1266	Bacteria	Firmicutes	Clostridia	Clostridiales	Lachnospiraceae	NA	NA	0.534897	0.666361
ASV_1267	Bacteria	Firmicutes	Bacilli	Lactobacillales	Lactobacillaceae	Lactobacillus	NA	0.332997	0.632834
ASV_1268	Bacteria	Firmicutes	Clostridia	Clostridiales	Lachnospiraceae	Lachnospiraceae_UCG-001	NA	0.130494	0.632834
ASV_1269	Bacteria	Firmicutes	Clostridia	Clostridiales	Ruminococcaceae	Ruminococcaceae_UCG-014	NA							0.70009	0.891849	0.941901	0.988543
ASV_1270	Bacteria	Firmicutes	Clostridia	Clostridiales	Lachnospiraceae	NA	NA			0.544443	0.894172			0.120397	0.501431	0.0999842	0.534961
ASV_1271	Bacteria	Proteobacteria	Alphaproteobacteria	NA	NA	NA	NA	0.13858	0.632834
ASV_1272	Bacteria	Firmicutes	Clostridia	Clostridiales	Clostridiales_vadinBB60_group	NA	NA									0.473598	0.77845
ASV_1273	Bacteria	Firmicutes	Clostridia	Clostridiales	Ruminococcaceae	Ruminococcaceae_UCG-014	NA							0.538759	0.808555	0.792359	0.922198
ASV_1274	Bacteria	Firmicutes	Clostridia	Clostridiales	Ruminococcaceae	Butyricicoccus	NA							0.648625	0.87353	0.0532033	0.489745
ASV_1275	Bacteria	Firmicutes	Clostridia	Clostridiales	Lachnospiraceae	NA	NA							0.213549	0.608149	0.790535	0.922198
ASV_1276	Bacteria	Firmicutes	Clostridia	Clostridiales	Clostridiales_vadinBB60_group	NA	NA							0.150454	0.533747	0.153132	0.536282
ASV_1277	Bacteria	Firmicutes	Clostridia	Clostridiales	Lachnospiraceae	NA	NA							0.0300866	0.333743
ASV_1278	Bacteria	Bacteroidetes	Bacteroidia	Bacteroidales	Muribaculaceae	NA	NA	0.151536	0.632834
ASV_1279	Bacteria	Bacteroidetes	Bacteroidia	Bacteroidales	Bacteroidaceae	Bacteroides	NA	0.135396	0.632834
ASV_1280	Bacteria	Proteobacteria	Alphaproteobacteria	Reyranellales	Reyranellaceae	Reyranella	NA	0.29462	0.632834
ASV_1281	Bacteria	Firmicutes	Clostridia	Clostridiales	Lachnospiraceae	NA	NA	0.464279	0.632834
ASV_1282	Bacteria	Firmicutes	Clostridia	Clostridiales	Lachnospiraceae	Coprococcus_2	NA	0.577708	0.698243	0.753741	0.939674			0.749385	0.90082
ASV_1283	Bacteria	Tenericutes	Mollicutes	Mollicutes_RF39	NA	NA	NA					0.392717	0.773839			0.018588	0.438173
ASV_1284	Bacteria	Firmicutes	Clostridia	Clostridiales	Lachnospiraceae	Tyzzerella	NA					0.713759	0.824576	0.147661	0.533747
ASV_1285	Bacteria	Firmicutes	Clostridia	Clostridiales	Lachnospiraceae	NA	NA	0.131066	0.632834
ASV_1286	Bacteria	Firmicutes	Clostridia	Clostridiales	Lachnospiraceae	NA	NA							0.508195	0.803694	0.613534	0.846603
ASV_1287	Bacteria	Firmicutes	Clostridia	Clostridiales	Ruminococcaceae	NA	NA	0.429888	0.632834					0.00824825	0.239334
ASV_1288	Bacteria	Firmicutes	Clostridia	Clostridiales	Lachnospiraceae	NA	NA							0.235737	0.62943
ASV_1289	Bacteria	Bacteroidetes	Bacteroidia	Bacteroidales	Muribaculaceae	NA	NA	0.537414	0.667447
ASV_1290	Bacteria	Firmicutes	Clostridia	Clostridiales	Family_XIII	NA	NA					0.376346	0.773839	0.145311	0.533747
ASV_1291	Bacteria	Firmicutes	Bacilli	Lactobacillales	Lactobacillaceae	Lactobacillus	NA	0.131066	0.632834
ASV_1292	Bacteria	Firmicutes	Clostridia	Clostridiales	Ruminococcaceae	Ruminiclostridium_9	NA							0.483652	0.78271
ASV_1293	Bacteria	Firmicutes	Clostridia	Clostridiales	Lachnospiraceae	NA	NA	0.131066	0.632834			0.808849	0.878265			0.670252	0.874776
ASV_1294	Bacteria	Firmicutes	Clostridia	Clostridiales	Ruminococcaceae	Ruminiclostridium_9	NA	0.131066	0.632834
ASV_1295	Bacteria	Firmicutes	Clostridia	Clostridiales	Ruminococcaceae	Ruminococcaceae_UCG-014	NA							0.220623	0.617362	0.167399	0.536282
ASV_1296	Bacteria	Firmicutes	Clostridia	Clostridiales	Lachnospiraceae	NA	NA	0.508639	0.646561
ASV_1297	Bacteria	Proteobacteria	Deltaproteobacteria	Desulfovibrionales	Desulfovibrionaceae	Bilophila	NA	0.151536	0.632834
ASV_1298	Bacteria	Firmicutes	Clostridia	Clostridiales	Lachnospiraceae	NA	NA							0.856425	0.94714
ASV_1299	Eukaryota	NA	NA	NA	NA	NA	NA
ASV_1300	Bacteria	Proteobacteria	Gammaproteobacteria	Betaproteobacteriales	Burkholderiaceae	Parasutterella	NA					0.691541	0.809813
ASV_1301	Bacteria	Firmicutes	Clostridia	Clostridiales	Lachnospiraceae	NA	NA							0.40219	0.748232
ASV_1302	Bacteria	Firmicutes	Clostridia	Clostridiales	Lachnospiraceae	Lachnospiraceae_UCG-001	NA							0.172552	0.573793
ASV_1303	Eukaryota	NA	NA	NA	NA	NA	NA
ASV_1304	Bacteria	Firmicutes	Clostridia	Clostridiales	Ruminococcaceae	Ruminiclostridium_9	NA							0.236807	0.62943
ASV_1305	Bacteria	Firmicutes	Clostridia	Clostridiales	Lachnospiraceae	NA	NA							0.148272	0.533747
ASV_1306	Bacteria	Firmicutes	Clostridia	Clostridiales	Ruminococcaceae	Ruminiclostridium_9	NA	0.429888	0.632834
ASV_1307	Bacteria	Firmicutes	Clostridia	Clostridiales	Lachnospiraceae	Lachnospiraceae_FCS020_group	NA			0.665533	0.91217	0.604031	0.773839	0.920197	0.970803	0.174671	0.541764
ASV_1308	Bacteria	Firmicutes	Clostridia	Clostridiales	Lachnospiraceae	NA	NA
ASV_1309	Bacteria	Firmicutes	Clostridia	Clostridiales	Lachnospiraceae	NA	NA	0.487586	0.633163
ASV_1310	Bacteria	Bacteroidetes	Bacteroidia	Bacteroidales	Muribaculaceae	NA	NA
ASV_1311	Bacteria	Firmicutes	Clostridia	Clostridiales	Lachnospiraceae	NA	NA							0.732216	0.899426	0.518817	0.779247
ASV_1312	Bacteria	Proteobacteria	Alphaproteobacteria	Sphingomonadales	Sphingomonadaceae	Sphingomonas	hankookensis
ASV_1313	Eukaryota	NA	NA	NA	NA	NA	NA
ASV_1314	Bacteria	Firmicutes	Clostridia	Clostridiales	Ruminococcaceae	NA	NA	0.429888	0.632834
ASV_1315	Bacteria	Proteobacteria	Gammaproteobacteria	Enterobacteriales	Enterobacteriaceae	Escherichia/Shigella	coli
ASV_1316	Bacteria	Firmicutes	Clostridia	Clostridiales	Lachnospiraceae	Lachnospiraceae_UCG-001	NA									0.884094	0.956828
ASV_1317	Bacteria	Firmicutes	Clostridia	Clostridiales	Family_XIII	Family_XIII_UCG-001	NA							0.787234	0.919906
ASV_1318	Bacteria	Firmicutes	Clostridia	Clostridiales	Ruminococcaceae	Ruminococcaceae_UCG-014	NA			0.094906	0.459184			0.953643	0.98044
ASV_1319	Bacteria	Proteobacteria	Gammaproteobacteria	Betaproteobacteriales	Burkholderiaceae	Parasutterella	NA					0.608028	0.773839
ASV_1320	Bacteria	Firmicutes	Clostridia	Clostridiales	Ruminococcaceae	Ruminococcaceae_UCG-014	NA									0.104208	0.534961
ASV_1321	Bacteria	Firmicutes	Clostridia	Clostridiales	Ruminococcaceae	Ruminococcaceae_UCG-014	NA							0.694501	0.888486	0.764541	0.918943
ASV_1322	Bacteria	Firmicutes	Clostridia	Clostridiales	Lachnospiraceae	NA	NA	0.972626	0.984769			0.608385	0.773839	0.459641	0.76721
ASV_1323	Bacteria	Firmicutes	Clostridia	Clostridiales	Ruminococcaceae	NA	NA					0.691541	0.809813	0.676455	0.885125
ASV_1324	Bacteria	Firmicutes	Clostridia	Clostridiales	Lachnospiraceae	A2	NA					0.296553	0.773839	0.860299	0.949262
ASV_1325	Bacteria	Firmicutes	Clostridia	Clostridiales	Lachnospiraceae	NA	NA							0.0767318	0.419154	0.0263366	0.456701
ASV_1326	Bacteria	Firmicutes	Clostridia	Clostridiales	Lachnospiraceae	NA	NA							0.960669	0.982939	0.682637	0.878031
ASV_1327	Bacteria	Firmicutes	Clostridia	Clostridiales	Lachnospiraceae	NA	NA							0.655361	0.877151	0.917645	0.973406
ASV_1328	Bacteria	Firmicutes	Clostridia	Clostridiales	Ruminococcaceae	Ruminococcaceae_UCG-014	NA
ASV_1329	Bacteria	Firmicutes	Clostridia	Clostridiales	Lachnospiraceae	NA	NA	0.487586	0.633163
ASV_1330	Bacteria	Firmicutes	Clostridia	Clostridiales	Lachnospiraceae	NA	NA							0.620098	0.86777
ASV_1331	Bacteria	Firmicutes	Clostridia	Clostridiales	Lachnospiraceae	NA	NA					0.469848	0.773839
ASV_1332	Bacteria	Firmicutes	Clostridia	Clostridiales	Lachnospiraceae	NA	NA			0.0713036	0.459184			0.720594	0.897504
ASV_1333	Bacteria	Firmicutes	Clostridia	Clostridiales	Ruminococcaceae	NA	NA	0.747301	0.832501
ASV_1334	Bacteria	Firmicutes	Clostridia	Clostridiales	Lachnospiraceae	Lachnoclostridium	NA					0.3947	0.773839	0.111235	0.482001
ASV_1335	Bacteria	Firmicutes	Clostridia	Clostridiales	Lachnospiraceae	NA	NA									0.10401	0.534961
ASV_1336	Bacteria	Firmicutes	Clostridia	Clostridiales	Ruminococcaceae	Oscillibacter	NA							0.638038	0.873106	0.267626	0.609534
ASV_1337	Bacteria	Firmicutes	Clostridia	Clostridiales	Ruminococcaceae	Ruminococcaceae_UCG-014	NA							0.579262	0.843273	0.116523	0.534961
ASV_1338	Bacteria	Bacteroidetes	Bacteroidia	Bacteroidales	Muribaculaceae	NA	NA
ASV_1339	Bacteria	Firmicutes	Clostridia	Clostridiales	Lachnospiraceae	Lachnoclostridium	NA	0.972626	0.984769			0.300286	0.773839
ASV_1340	Bacteria	Firmicutes	Clostridia	Clostridiales	Ruminococcaceae	Ruminiclostridium_5	NA					0.469848	0.773839
ASV_1341	Bacteria	Firmicutes	Clostridia	Clostridiales	Ruminococcaceae	NA	NA					0.583022	0.773839	0.642036	0.873133	0.953536	0.988894
ASV_1342	Bacteria	Bacteroidetes	Bacteroidia	Bacteroidales	Muribaculaceae	NA	NA	0.530716	0.662171
ASV_1343	Bacteria	Firmicutes	Clostridia	Clostridiales	Lachnospiraceae	NA	NA							0.0924071	0.453168
ASV_1344	Bacteria	Firmicutes	Clostridia	Clostridiales	Lachnospiraceae	NA	NA									0.962809	0.988894
ASV_1345	Bacteria	Proteobacteria	Deltaproteobacteria	Desulfovibrionales	Desulfovibrionaceae	Desulfovibrio	NA	0.268401	0.632834
ASV_1346	Bacteria	Firmicutes	Clostridia	Clostridiales	Lachnospiraceae	GCA-900066575	NA							0.136834	0.530512	0.0237684	0.453382
ASV_1347	Bacteria	Firmicutes	Clostridia	Clostridiales	Lachnospiraceae	NA	NA							0.745818	0.90082	0.0559154	0.489745
ASV_1348	Bacteria	Firmicutes	Clostridia	Clostridiales	Lachnospiraceae	NA	NA							0.1391	0.530512
ASV_1349	Bacteria	Firmicutes	Clostridia	Clostridiales	Lachnospiraceae	NA	NA					0.494834	0.773839	0.95044	0.98044
ASV_1350	Bacteria	Firmicutes	Clostridia	Clostridiales	Ruminococcaceae	Ruminococcaceae_UCG-013	NA
ASV_1351	Bacteria	Firmicutes	Clostridia	Clostridiales	Lachnospiraceae	NA	NA							0.1017	0.476638
ASV_1352	Bacteria	Firmicutes	Clostridia	Clostridiales	Lachnospiraceae	GCA-900066575	NA							0.0392069	0.342131
ASV_1353	Bacteria	Firmicutes	Clostridia	Clostridiales	Lachnospiraceae	Lachnospiraceae_NK4A136_group	NA							0.996707	0.999409
ASV_1354	Bacteria	Firmicutes	Clostridia	Clostridiales	Lachnospiraceae	GCA-900066575	NA			0.784701	0.939674
ASV_1355	Bacteria	Actinobacteria	Actinobacteria	Corynebacteriales	Nocardiaceae	Gordonia	NA	0.326102	0.632834
ASV_1356	Bacteria	Firmicutes	Clostridia	Clostridiales	Lachnospiraceae	UC5-1-2E3	NA							0.0469268	0.370455
ASV_1357	Bacteria	Firmicutes	Clostridia	Clostridiales	Lachnospiraceae	NA	NA							0.256751	0.635267
ASV_1358	Eukaryota	NA	NA	NA	NA	NA	NA
ASV_1359	Bacteria	Firmicutes	Clostridia	Clostridiales	Lachnospiraceae	Lachnospiraceae_UCG-001	NA			0.549657	0.897054
ASV_1360	Bacteria	Firmicutes	Clostridia	Clostridiales	Lachnospiraceae	Lachnospiraceae_NK4A136_group	NA			0.707902	0.914856					0.948715	0.988894
ASV_1361	Bacteria	Firmicutes	Clostridia	Clostridiales	Ruminococcaceae	Ruminiclostridium	NA							0.443631	0.76201	0.134119	0.534961
ASV_1362	Bacteria	Firmicutes	Clostridia	Clostridiales	Lachnospiraceae	NA	NA							0.0372336	0.342131	0.0441951	0.489745
ASV_1363	Bacteria	Proteobacteria	Alphaproteobacteria	Rhizobiales	Beijerinckiaceae	Methylobacterium	NA
ASV_1364	Bacteria	Firmicutes	Clostridia	Clostridiales	Ruminococcaceae	Ruminiclostridium_9	NA							0.84747	0.947034
ASV_1365	Bacteria	Firmicutes	Clostridia	Clostridiales	Ruminococcaceae	Oscillibacter	NA
ASV_1366	Bacteria	Firmicutes	Clostridia	Clostridiales	Lachnospiraceae	NA	NA			0.789341	0.939674			0.915093	0.969371	0.670252	0.874776
ASV_1367	Bacteria	Firmicutes	Clostridia	Clostridiales	Ruminococcaceae	Ruminiclostridium_9	NA							0.459388	0.76721	0.293182	0.631915
ASV_1368	Bacteria	Firmicutes	Clostridia	Clostridiales	Ruminococcaceae	Ruminococcaceae_UCG-014	NA							0.0518116	0.37742
ASV_1369	Bacteria	Firmicutes	Clostridia	Clostridiales	Ruminococcaceae	Ruminiclostridium_9	NA							0.92687	0.971912
ASV_1370	Bacteria	Firmicutes	Clostridia	Clostridiales	Ruminococcaceae	Ruminiclostridium_9	NA					0.583022	0.773839
ASV_1371	Bacteria	Firmicutes	Clostridia	Clostridiales	Ruminococcaceae	Ruminiclostridium_5	NA	0.568239	0.698243
ASV_1372	Bacteria	Firmicutes	Clostridia	Clostridiales	Lachnospiraceae	NA	NA							0.99126	0.999409
ASV_1373	Bacteria	Firmicutes	Clostridia	Clostridiales	Ruminococcaceae	Oscillibacter	NA							0.120839	0.501431
ASV_1374	Bacteria	Firmicutes	Clostridia	Clostridiales	Lachnospiraceae	Lachnoclostridium	NA
ASV_1375	Bacteria	Firmicutes	Clostridia	Clostridiales	Ruminococcaceae	Ruminococcaceae_UCG-005	NA			0.0762796	0.459184			0.356033	0.7201	0.716784	0.887835
ASV_1376	Bacteria	Firmicutes	Clostridia	Clostridiales	Clostridiales_vadinBB60_group	NA	NA
ASV_1377	Bacteria	Firmicutes	Clostridia	Clostridiales	Ruminococcaceae	NA	NA							0.92662	0.971912	0.798916	0.922198
ASV_1378	Bacteria	Firmicutes	Clostridia	Clostridiales	Ruminococcaceae	Ruminococcaceae_UCG-014	NA					0.213118	0.773839	0.749385	0.90082	0.516266	0.779247
ASV_1379	Bacteria	Firmicutes	Clostridia	Clostridiales	Ruminococcaceae	NA	NA							0.0101714	0.239334
ASV_1380	Bacteria	Firmicutes	Clostridia	Clostridiales	Lachnospiraceae	NA	NA	0.268401	0.632834
ASV_1381	Bacteria	Firmicutes	Clostridia	Clostridiales	Ruminococcaceae	Ruminococcaceae_UCG-014	NA							0.916903	0.96984
ASV_1382	Bacteria	Proteobacteria	Gammaproteobacteria	Betaproteobacteriales	Neisseriaceae	NA	NA
ASV_1383	Bacteria	Proteobacteria	Alphaproteobacteria	Rhizobiales	Xanthobacteraceae	Bradyrhizobium	NA	0.346146	0.632834
ASV_1384	Bacteria	Firmicutes	Clostridia	Clostridiales	Lachnospiraceae	NA	NA			0.0784849	0.459184			0.900961	0.968029
ASV_1385	Bacteria	Firmicutes	Clostridia	Clostridiales	Ruminococcaceae	Harryflintia	NA	0.972626	0.984769
ASV_1386	Bacteria	Firmicutes	Clostridia	Clostridiales	Ruminococcaceae	Oscillibacter	NA							0.0372336	0.342131
ASV_1387	Bacteria	Firmicutes	Clostridia	Clostridiales	Lachnospiraceae	Lachnospiraceae_UCG-006	NA							0.915131	0.969371	0.518817	0.779247
ASV_1388	Bacteria	Firmicutes	Clostridia	Clostridiales	Ruminococcaceae	Oscillibacter	NA			0.0375356	0.459184			0.082919	0.42761	0.136782	0.534961
ASV_1389	Bacteria	Firmicutes	Clostridia	Clostridiales	Lachnospiraceae	Lachnoclostridium	NA							0.910421	0.969371
ASV_1390	Bacteria	Firmicutes	Clostridia	Clostridiales	Ruminococcaceae	Ruminococcaceae_UCG-014	NA					0.541129	0.773839
ASV_1391	Bacteria	Tenericutes	Mollicutes	Mollicutes_RF39	NA	NA	NA							0.796449	0.923956	0.430255	0.767515
ASV_1392	Bacteria	Firmicutes	Clostridia	Clostridiales	Lachnospiraceae	NA	NA									0.141642	0.534961
ASV_1393	Bacteria	Firmicutes	Clostridia	Clostridiales	Ruminococcaceae	Ruminiclostridium_9	NA	0.483794	0.632834
ASV_1394	Eukaryota	NA	NA	NA	NA	NA	NA
ASV_1395	Bacteria	Firmicutes	Clostridia	Clostridiales	Lachnospiraceae	NA	NA			0.707902	0.914856					0.0620476	0.489745
ASV_1396	Bacteria	Firmicutes	Clostridia	Clostridiales	Ruminococcaceae	Oscillibacter	NA					0.808849	0.878265			0.947184	0.988894
ASV_1397	Bacteria	Firmicutes	Clostridia	Clostridiales	Lachnospiraceae	NA	NA
ASV_1398	Bacteria	Firmicutes	Clostridia	Clostridiales	Ruminococcaceae	Oscillibacter	NA							0.0219671	0.333743	0.0119716	0.383534
ASV_1399	Bacteria	Firmicutes	Clostridia	Clostridiales	Lachnospiraceae	NA	NA
ASV_1400	Bacteria	Firmicutes	Clostridia	Clostridiales	Lachnospiraceae	NA	NA							0.443631	0.76201	0.436735	0.767515
ASV_1401	Bacteria	Firmicutes	Clostridia	Clostridiales	Lachnospiraceae	Roseburia	NA	0.324637	0.632834
ASV_1402	Bacteria	Firmicutes	Clostridia	Clostridiales	Ruminococcaceae	Oscillibacter	NA							0.850478	0.947034
ASV_1403	Bacteria	Firmicutes	Clostridia	Clostridiales	Lachnospiraceae	Lachnospiraceae_NK4A136_group	NA
ASV_1404	Bacteria	Bacteroidetes	Bacteroidia	Bacteroidales	Muribaculaceae	NA	NA	0.151536	0.632834
ASV_1405	Bacteria	Firmicutes	Clostridia	Clostridiales	Lachnospiraceae	NA	NA									0.562966	0.807412
ASV_1406	Bacteria	Firmicutes	Clostridia	Clostridiales	Ruminococcaceae	Ruminococcaceae_UCG-014	NA
ASV_1407	Bacteria	Firmicutes	Clostridia	Clostridiales	Ruminococcaceae	NA	NA							0.214286	0.608149
ASV_1408	Bacteria	Firmicutes	Clostridia	Clostridiales	Ruminococcaceae	Oscillibacter	NA							0.0574654	0.399368
ASV_1409	Bacteria	Verrucomicrobia	Verrucomicrobiae	Verrucomicrobiales	Akkermansiaceae	Akkermansia	muciniphila					0.608028	0.773839
ASV_1410	Bacteria	Firmicutes	Clostridia	Clostridiales	Clostridiales_vadinBB60_group	NA	NA	0.115895	0.632834
ASV_1411	Bacteria	Firmicutes	Clostridia	Clostridiales	Ruminococcaceae	Ruminiclostridium	NA			0.0657924	0.459184
ASV_1412	Bacteria	Firmicutes	Clostridia	Clostridiales	Family_XIII	Family_XIII_AD3011_group	NA
ASV_1413	Bacteria	Firmicutes	Clostridia	Clostridiales	Ruminococcaceae	Oscillibacter	NA									0.813804	0.931776
ASV_1414	Bacteria	Firmicutes	Clostridia	Clostridiales	Lachnospiraceae	NA	NA									0.10013	0.534961
ASV_1415	Bacteria	Firmicutes	Clostridia	Clostridiales	Family_XIII	Family_XIII_AD3011_group	NA							0.877445	0.954086
ASV_1416	Bacteria	Firmicutes	Clostridia	Clostridiales	Lachnospiraceae	NA	NA							0.0347693	0.342131
ASV_1417	Bacteria	Firmicutes	Clostridia	Clostridiales	Ruminococcaceae	Ruminiclostridium_9	NA
ASV_1418	Bacteria	Proteobacteria	Alphaproteobacteria	Rhizobiales	Xanthobacteraceae	NA	NA
ASV_1419	Bacteria	Firmicutes	Clostridia	Clostridiales	Lachnospiraceae	Lachnoclostridium	NA
ASV_1420	Bacteria	Firmicutes	Clostridia	Clostridiales	Ruminococcaceae	Ruminiclostridium	NA	0.268401	0.632834
ASV_1421	Bacteria	Firmicutes	Clostridia	Clostridiales	Ruminococcaceae	Anaerotruncus	NA							0.242144	0.62943	0.148639	0.534961
ASV_1422	Bacteria	Firmicutes	Clostridia	Clostridiales	Lachnospiraceae	NA	NA							0.291456	0.650584	0.499327	0.779114
ASV_1423	Bacteria	Firmicutes	Clostridia	Clostridiales	Lachnospiraceae	Lachnospiraceae_NK4A136_group	NA					0.583022	0.773839	0.0855088	0.42761
ASV_1424	Bacteria	Firmicutes	Clostridia	Clostridiales	Lachnospiraceae	NA	NA							0.900961	0.968029
ASV_1425	Bacteria	Firmicutes	Clostridia	Clostridiales	Ruminococcaceae	Ruminiclostridium_9	NA	0.268401	0.632834
ASV_1426	Bacteria	Firmicutes	Clostridia	Clostridiales	Ruminococcaceae	Ruminiclostridium_9	NA	0.268401	0.632834
ASV_1427	Bacteria	Firmicutes	Clostridia	Clostridiales	Ruminococcaceae	Oscillibacter	NA									0.999659	0.999909
ASV_1428	Bacteria	Proteobacteria	Alphaproteobacteria	Rhizobiales	Rhizobiaceae	Phyllobacterium	myrsinacearum	0.380155	0.632834
ASV_1429	Bacteria	Firmicutes	Clostridia	Clostridiales	Ruminococcaceae	Ruminiclostridium_5	NA							0.566541	0.830984	0.267626	0.609534
ASV_1430	Bacteria	Firmicutes	Clostridia	Clostridiales	Lachnospiraceae	Lachnospiraceae_FCS020_group	NA							0.811442	0.92914
ASV_1431	Bacteria	Firmicutes	Clostridia	Clostridiales	Peptococcaceae	NA	NA							0.0077876	0.239334	0.0258205	0.456701
ASV_1432	Bacteria	Firmicutes	Clostridia	Clostridiales	Lachnospiraceae	NA	NA			0.129436	0.478308
ASV_1433	Bacteria	Firmicutes	Clostridia	Clostridiales	Ruminococcaceae	Ruminococcaceae_UCG-010	NA									0.708163	0.886793
ASV_1434	Bacteria	Actinobacteria	Actinobacteria	Micrococcales	Brevibacteriaceae	Brevibacterium	NA
ASV_1435	Bacteria	Firmicutes	Clostridia	Clostridiales	Ruminococcaceae	Ruminiclostridium_5	NA							0.0626545	0.399368
ASV_1436	Bacteria	Firmicutes	Clostridia	Clostridiales	Lachnospiraceae	Lachnoclostridium	NA							0.126082	0.509731
ASV_1437	Bacteria	Firmicutes	Clostridia	Clostridiales	Lachnospiraceae	NA	NA	0.972626	0.984769
ASV_1438	Bacteria	Firmicutes	Clostridia	Clostridiales	Ruminococcaceae	NA	NA	0.972626	0.984769
ASV_1439	Bacteria	Bacteroidetes	Bacteroidia	Flavobacteriales	Weeksellaceae	Chryseobacterium	massiliae
ASV_1440	Bacteria	Actinobacteria	Actinobacteria	Propionibacteriales	Propionibacteriaceae	Cutibacterium	NA
ASV_1441	Bacteria	Firmicutes	Clostridia	Clostridiales	Lachnospiraceae	NA	NA
ASV_1442	Bacteria	Firmicutes	Clostridia	Clostridiales	Lachnospiraceae	Lachnospiraceae_UCG-001	NA
ASV_1443	Bacteria	Firmicutes	Clostridia	Clostridiales	Clostridiales_vadinBB60_group	NA	NA									0.664706	0.874776
ASV_1444	Bacteria	Firmicutes	Clostridia	Clostridiales	Lachnospiraceae	NA	NA			0.0850846	0.459184			0.61469	0.866896
ASV_1445	Bacteria	Firmicutes	Clostridia	Clostridiales	Lachnospiraceae	NA	NA							0.983326	0.99667
ASV_1446	Bacteria	Firmicutes	Clostridia	Clostridiales	Lachnospiraceae	Lachnoclostridium	NA					0.738373	0.832864
ASV_1447	Bacteria	Proteobacteria	Gammaproteobacteria	Gammaproteobacteria_Incertae_Sedis	Unknown_Family	Acidibacter	NA
ASV_1448	Bacteria	Firmicutes	Clostridia	Clostridiales	Ruminococcaceae	Ruminococcaceae_UCG-014	NA							0.0433056	0.357505
ASV_1449	Bacteria	Firmicutes	Clostridia	Clostridiales	Lachnospiraceae	NA	NA							0.774873	0.914165	0.999659	0.999909
ASV_1450	Bacteria	Firmicutes	Clostridia	Clostridiales	Ruminococcaceae	Ruminiclostridium_9	NA									0.880145	0.955264
ASV_1451	Bacteria	Firmicutes	Clostridia	Clostridiales	Lachnospiraceae	Lachnospiraceae_UCG-010	NA							0.784138	0.918454
ASV_1452	Bacteria	Firmicutes	Clostridia	Clostridiales	Ruminococcaceae	Ruminiclostridium_9	NA					0.392211	0.773839	0.378395	0.729469
ASV_1453	Bacteria	Firmicutes	Clostridia	Clostridiales	Ruminococcaceae	NA	NA							0.300989	0.660372
ASV_1454	Bacteria	Firmicutes	Clostridia	Clostridiales	Lachnospiraceae	Lachnoclostridium	NA							0.152002	0.53476
ASV_1455	Bacteria	Firmicutes	Clostridia	Clostridiales	NA	NA	NA					0.469848	0.773839
ASV_1456	Bacteria	Firmicutes	Clostridia	Clostridiales	Lachnospiraceae	NA	NA
ASV_1457	Bacteria	Firmicutes	Bacilli	Lactobacillales	Enterococcaceae	Enterococcus	gallinarum
ASV_1458	Bacteria	Firmicutes	Clostridia	Clostridiales	Lachnospiraceae	NA	NA			0.495204	0.864322
ASV_1459	Bacteria	Firmicutes	Clostridia	Clostridiales	Ruminococcaceae	Ruminococcaceae_UCG-014	NA							0.874198	0.95376
ASV_1460	Bacteria	Firmicutes	Clostridia	Clostridiales	Lachnospiraceae	NA	NA
ASV_1461	Bacteria	Firmicutes	Clostridia	Clostridiales	Ruminococcaceae	Ruminococcaceae_UCG-014	NA			0.952702	0.991211			0.021195	0.333743
ASV_1462	Bacteria	Firmicutes	Clostridia	Clostridiales	Ruminococcaceae	NA	NA							0.204929	0.605574
ASV_1463	Bacteria	Firmicutes	Clostridia	Clostridiales	Family_XIII	NA	NA
ASV_1464	Bacteria	Firmicutes	Clostridia	Clostridiales	Lachnospiraceae	NA	NA			0.0721429	0.459184
ASV_1465	Bacteria	Proteobacteria	Alphaproteobacteria	Rhizobiales	Beijerinckiaceae	Methylobacterium	jeotgali
ASV_1466	Bacteria	Firmicutes	Clostridia	Clostridiales	NA	NA	NA
ASV_1467	Bacteria	Firmicutes	Clostridia	Clostridiales	Lachnospiraceae	Lachnospiraceae_NK4A136_group	NA
ASV_1468	Bacteria	Firmicutes	Clostridia	Clostridiales	Ruminococcaceae	Ruminococcaceae_UCG-014	NA									0.516266	0.779247
ASV_1469	Bacteria	Actinobacteria	Actinobacteria	Micrococcales	Microbacteriaceae	Microbacterium	testaceum
ASV_1470	Bacteria	Actinobacteria	Thermoleophilia	Solirubrobacterales	Solirubrobacteraceae	Conexibacter	NA	0.800524	0.871309
ASV_1471	Bacteria	Firmicutes	Clostridia	Clostridiales	Lachnospiraceae	Lachnospiraceae_NK4A136_group	NA							0.0101714	0.239334
ASV_1472	Bacteria	Firmicutes	Clostridia	Clostridiales	Lachnospiraceae	NA	NA							0.0219671	0.333743
ASV_1473	Bacteria	Proteobacteria	Gammaproteobacteria	Pseudomonadales	Moraxellaceae	Acinetobacter	guillouiae	0.650997	0.760747
ASV_1474	Bacteria	Proteobacteria	Alphaproteobacteria	Rhizobiales	Xanthobacteraceae	Afipia	NA
ASV_1475	Bacteria	Firmicutes	Clostridia	Clostridiales	Lachnospiraceae	Lachnospiraceae_NK4A136_group	NA	0.151536	0.632834
ASV_1476	Bacteria	Firmicutes	Clostridia	Clostridiales	Family_XIII	Anaerovorax	NA									0.773367	0.918943
ASV_1477	Bacteria	Firmicutes	Clostridia	Clostridiales	Ruminococcaceae	NA	NA							0.594174	0.854	0.0671249	0.489745
ASV_1478	Bacteria	Firmicutes	Clostridia	Clostridiales	Ruminococcaceae	Ruminiclostridium_9	NA							0.847705	0.947034	0.0532033	0.489745
ASV_1479	Bacteria	Proteobacteria	Gammaproteobacteria	Betaproteobacteriales	Burkholderiaceae	Delftia	NA
ASV_1480	Bacteria	Firmicutes	Clostridia	Clostridiales	Lachnospiraceae	NA	NA							0.944021	0.978636
ASV_1481	Bacteria	Firmicutes	Clostridia	Clostridiales	Lachnospiraceae	NA	NA
ASV_1482	Bacteria	Firmicutes	Clostridia	Clostridiales	Lachnospiraceae	Lachnospiraceae_NK4A136_group	NA			0.120001	0.469095
ASV_1483	Bacteria	Firmicutes	Clostridia	Clostridiales	Lachnospiraceae	NA	NA			0.0850846	0.459184
ASV_1484	Bacteria	Firmicutes	Clostridia	Clostridiales	Lachnospiraceae	NA	NA			0.633468	0.91217
ASV_1485	Bacteria	Firmicutes	Clostridia	Clostridiales	Ruminococcaceae	Ruminiclostridium_5	NA			0.293947	0.659396			0.792405	0.923679
ASV_1486	Bacteria	Firmicutes	Clostridia	Clostridiales	Lachnospiraceae	GCA-900066575	NA			0.18107	0.538654	0.650106	0.796237
ASV_1487	Bacteria	Firmicutes	Clostridia	Clostridiales	Lachnospiraceae	NA	NA							0.836195	0.942066
ASV_1488	Bacteria	Firmicutes	Clostridia	Clostridiales	Lachnospiraceae	NA	NA							0.360668	0.720544
ASV_1489	Bacteria	Firmicutes	Clostridia	Clostridiales	Lachnospiraceae	NA	NA
ASV_1490	Bacteria	Firmicutes	Clostridia	Clostridiales	Lachnospiraceae	Lachnoclostridium	NA									0.123366	0.534961
ASV_1491	Bacteria	Firmicutes	Clostridia	Clostridiales	Ruminococcaceae	Ruminiclostridium_9	NA							0.378395	0.729469	0.0532033	0.489745
ASV_1492	Bacteria	Firmicutes	Clostridia	Clostridiales	Clostridiales_vadinBB60_group	NA	NA									0.0671249	0.489745
ASV_1493	Bacteria	Firmicutes	Clostridia	Clostridiales	Lachnospiraceae	NA	NA									0.0849328	0.51843
ASV_1494	Bacteria	Firmicutes	Clostridia	Clostridiales	Lachnospiraceae	NA	NA			0.053595	0.459184			0.681729	0.885125
ASV_1495	Bacteria	Firmicutes	Clostridia	Clostridiales	Lachnospiraceae	NA	NA							0.059253	0.399368
ASV_1496	Bacteria	Firmicutes	Clostridia	Clostridiales	Lachnospiraceae	NA	NA							0.0962166	0.464808
ASV_1497	Bacteria	Firmicutes	Erysipelotrichia	Erysipelotrichales	Erysipelotrichaceae	NA	NA							0.627483	0.870409
ASV_1498	Bacteria	Firmicutes	Clostridia	Clostridiales	Lachnospiraceae	NA	NA
ASV_1499	Bacteria	Firmicutes	Clostridia	Clostridiales	Lachnospiraceae	NA	NA
ASV_1500	Bacteria	Proteobacteria	Gammaproteobacteria	Betaproteobacteriales	Burkholderiaceae	Parasutterella	NA
ASV_1501	Bacteria	Actinobacteria	Actinobacteria	Corynebacteriales	Corynebacteriaceae	Corynebacterium	NA					0.808849	0.878265
ASV_1502	Eukaryota	NA	NA	NA	NA	NA	NA
ASV_1503	Bacteria	Firmicutes	Bacilli	Lactobacillales	Lactobacillaceae	Lactobacillus	NA
ASV_1504	Bacteria	Firmicutes	Clostridia	Clostridiales	Ruminococcaceae	Anaerotruncus	NA									0.0695802	0.489745
ASV_1505	Bacteria	Firmicutes	Clostridia	Clostridiales	Ruminococcaceae	Ruminococcaceae_UCG-014	NA
ASV_1506	Bacteria	Firmicutes	Clostridia	Clostridiales	NA	NA	NA									0.10865	0.534961
ASV_1507	Bacteria	Firmicutes	Clostridia	Clostridiales	Ruminococcaceae	Ruminiclostridium_9	NA					0.676788	0.807152	0.655831	0.877151
ASV_1508	Bacteria	Actinobacteria	Coriobacteriia	Coriobacteriales	Eggerthellaceae	Enterorhabdus	NA							0.891634	0.965192
ASV_1509	Bacteria	Firmicutes	Clostridia	Clostridiales	Lachnospiraceae	NA	NA
ASV_1510	Bacteria	Firmicutes	Clostridia	Clostridiales	Family_XI	Finegoldia	NA					0.511188	0.773839
ASV_1511	Bacteria	Firmicutes	Bacilli	Lactobacillales	Lactobacillaceae	Lactobacillus	NA			0.707902	0.914856
ASV_1512	Bacteria	Actinobacteria	Actinobacteria	Corynebacteriales	Corynebacteriaceae	Corynebacterium_1	NA
ASV_1513	Bacteria	Firmicutes	Clostridia	Clostridiales	Lachnospiraceae	Lachnospiraceae_UCG-001	NA							0.489356	0.788002
ASV_1514	Bacteria	Bacteroidetes	Bacteroidia	Bacteroidales	Muribaculaceae	CAG-873	NA	0.268401	0.632834
ASV_1515	Bacteria	Actinobacteria	Actinobacteria	Corynebacteriales	Segniliparaceae	Segniliparus	NA	0.268401	0.632834
ASV_1516	Bacteria	Firmicutes	Clostridia	Clostridiales	Clostridiales_vadinBB60_group	NA	NA									0.436089	0.767515
ASV_1517	Bacteria	Firmicutes	Clostridia	Clostridiales	Lachnospiraceae	NA	NA
ASV_1518	Bacteria	Proteobacteria	Gammaproteobacteria	Pseudomonadales	Pseudomonadaceae	Pseudomonas	NA	0.429492	0.632834
ASV_1519	Bacteria	Firmicutes	Clostridia	Clostridiales	Ruminococcaceae	Ruminiclostridium	NA							0.996	0.999409
ASV_1520	Bacteria	Firmicutes	Clostridia	Clostridiales	Ruminococcaceae	Ruminococcaceae_UCG-014	NA							0.871175	0.952981
ASV_1521	Bacteria	Firmicutes	Clostridia	Clostridiales	Family_XIII	Family_XIII_UCG-001	NA							0.063173	0.399368
ASV_1522	Bacteria	Firmicutes	Clostridia	Clostridiales	Lachnospiraceae	NA	NA							0.741031	0.899426
ASV_1523	Bacteria	Firmicutes	Clostridia	Clostridiales	Lachnospiraceae	NA	NA							0.234685	0.62943
ASV_1524	Bacteria	Firmicutes	Clostridia	Clostridiales	Lachnospiraceae	Lachnospiraceae_FCS020_group	NA
ASV_1525	Bacteria	Firmicutes	Clostridia	Clostridiales	Lachnospiraceae	NA	NA					0.593913	0.773839
ASV_1526	Bacteria	Firmicutes	Clostridia	Clostridiales	Lachnospiraceae	NA	NA					0.510685	0.773839
ASV_1527	Bacteria	Firmicutes	Bacilli	Lactobacillales	Enterococcaceae	Enterococcus	NA
ASV_1528	Bacteria	Firmicutes	Clostridia	Clostridiales	Lachnospiraceae	Roseburia	NA
ASV_1529	Bacteria	Firmicutes	Clostridia	Clostridiales	Ruminococcaceae	Ruminococcaceae_UCG-014	NA
ASV_1530	Bacteria	Firmicutes	Clostridia	Clostridiales	Clostridiales_vadinBB60_group	NA	NA									0.420823	0.765535
ASV_1531	Bacteria	Firmicutes	Clostridia	Clostridiales	Ruminococcaceae	NA	NA									0.167399	0.536282
ASV_1532	Bacteria	Firmicutes	Clostridia	Clostridiales	Ruminococcaceae	Ruminococcaceae_UCG-014	NA							0.0265782	0.333743
ASV_1533	Bacteria	Proteobacteria	Alphaproteobacteria	Sphingomonadales	Sphingomonadaceae	Sphingomonas	NA
ASV_1534	Bacteria	Firmicutes	Clostridia	Clostridiales	Ruminococcaceae	Oscillibacter	NA									0.267626	0.609534
ASV_1535	Bacteria	Firmicutes	Clostridia	Clostridiales	Lachnospiraceae	NA	NA									0.0541185	0.489745
ASV_1536	Bacteria	Firmicutes	Clostridia	Clostridiales	Ruminococcaceae	Ruminiclostridium_9	NA							0.0219671	0.333743
ASV_1537	Bacteria	Bacteroidetes	Bacteroidia	Bacteroidales	Muribaculaceae	NA	NA							0.0714777	0.410121
ASV_1538	Bacteria	Firmicutes	Clostridia	Clostridiales	Lachnospiraceae	NA	NA							0.874198	0.95376
ASV_1539	Bacteria	Firmicutes	Clostridia	Clostridiales	Ruminococcaceae	Anaerotruncus	NA							0.129475	0.515247
ASV_1540	Bacteria	Bacteroidetes	Bacteroidia	Bacteroidales	Rikenellaceae	Rikenellaceae_RC9_gut_group	NA
ASV_1541	Bacteria	Firmicutes	Clostridia	Clostridiales	Lachnospiraceae	NA	NA
ASV_1542	Bacteria	Bacteroidetes	Bacteroidia	Bacteroidales	Tannerellaceae	Parabacteroides	NA
ASV_1543	Bacteria	Firmicutes	Clostridia	Clostridiales	Ruminococcaceae	Ruminiclostridium_9	NA
ASV_1544	Bacteria	Firmicutes	Clostridia	Clostridiales	Ruminococcaceae	NA	NA					0.537688	0.773839
ASV_1545	Bacteria	Proteobacteria	Deltaproteobacteria	Desulfovibrionales	Desulfovibrionaceae	NA	NA			0.668451	0.91217
ASV_1546	Bacteria	Actinobacteria	Actinobacteria	Micrococcales	Microbacteriaceae	Microbacterium	NA			0.207437	0.563896
ASV_1547	Bacteria	Actinobacteria	Actinobacteria	Micrococcales	Microbacteriaceae	Microbacterium	testaceum			0.300012	0.663112
ASV_1548	Bacteria	Firmicutes	Clostridia	Clostridiales	Lachnospiraceae	NA	NA					0.612955	0.773839
ASV_1549	Bacteria	Bacteroidetes	Bacteroidia	Bacteroidales	Muribaculaceae	Muribaculum	NA
ASV_1550	Bacteria	Firmicutes	Clostridia	Clostridiales	Ruminococcaceae	Ruminococcaceae_NK4A214_group	NA
ASV_1551	Bacteria	Firmicutes	Bacilli	Lactobacillales	Aerococcaceae	Aerococcus	NA
ASV_1552	Bacteria	Firmicutes	Clostridia	Clostridiales	Lachnospiraceae	Lachnospiraceae_NK4A136_group	NA
ASV_1553	Bacteria	Tenericutes	Mollicutes	Mollicutes_RF39	NA	NA	NA									0.025821	0.456701
ASV_1554	Bacteria	Firmicutes	Clostridia	Clostridiales	Ruminococcaceae	Ruminococcaceae_UCG-014	NA
ASV_1555	Bacteria	Firmicutes	Clostridia	Clostridiales	Ruminococcaceae	NA	NA
ASV_1556	Bacteria	Firmicutes	Clostridia	Clostridiales	Lachnospiraceae	NA	NA
ASV_1557	Bacteria	Bacteroidetes	Bacteroidia	Bacteroidales	Marinifilaceae	Odoribacter	NA
ASV_1558	Bacteria	Firmicutes	Clostridia	Clostridiales	Ruminococcaceae	Harryflintia	NA							0.429965	0.761995
ASV_1559	Bacteria	Firmicutes	Clostridia	Clostridiales	Lachnospiraceae	NA	NA							0.741031	0.899426
ASV_1560	Bacteria	Firmicutes	Clostridia	Clostridiales	Lachnospiraceae	NA	NA							0.856189	0.94714
ASV_1561	Bacteria	Firmicutes	Clostridia	Clostridiales	Lachnospiraceae	NA	NA							0.836195	0.942066
ASV_1562	Bacteria	Actinobacteria	Coriobacteriia	Coriobacteriales	Eggerthellaceae	Enterorhabdus	NA					0.392717	0.773839
ASV_1563	Bacteria	Bacteroidetes	Bacteroidia	Bacteroidales	Muribaculaceae	Muribaculum	NA			0.131025	0.479222
ASV_1564	Bacteria	Proteobacteria	Alphaproteobacteria	Sphingomonadales	Sphingomonadaceae	Sphingomonas	NA
ASV_1565	Bacteria	Cyanobacteria	Melainabacteria	Gastranaerophilales	NA	NA	NA
ASV_1566	Bacteria	Proteobacteria	Gammaproteobacteria	Betaproteobacteriales	Burkholderiaceae	Oxalobacter	NA
ASV_1567	Bacteria	Firmicutes	Clostridia	Clostridiales	Lachnospiraceae	NA	NA
ASV_1568	Bacteria	Firmicutes	Clostridia	Clostridiales	Lachnospiraceae	NA	NA
ASV_1569	Bacteria	Firmicutes	Clostridia	Clostridiales	Ruminococcaceae	NA	NA
ASV_1570	Bacteria	Firmicutes	Clostridia	Clostridiales	Ruminococcaceae	NA	NA
ASV_1571	Bacteria	Firmicutes	Clostridia	Clostridiales	Ruminococcaceae	Ruminiclostridium_9	NA									0.513683	0.779247
ASV_1572	Bacteria	Firmicutes	Clostridia	Clostridiales	Lachnospiraceae	Lachnospiraceae_UCG-001	NA									0.134119	0.534961
ASV_1573	Bacteria	Firmicutes	Clostridia	Clostridiales	Ruminococcaceae	Anaerotruncus	NA									0.0979551	0.534961
ASV_1574	Bacteria	Firmicutes	Clostridia	Clostridiales	Lachnospiraceae	NA	NA									0.293182	0.631915
ASV_1575	Bacteria	Firmicutes	Clostridia	Clostridiales	Ruminococcaceae	Ruminococcaceae_UCG-014	NA							0.00389147	0.179934
ASV_1576	Bacteria	Firmicutes	Clostridia	Clostridiales	Ruminococcaceae	Butyricicoccus	NA							0.855833	0.94714
ASV_1577	Bacteria	Firmicutes	Clostridia	Clostridiales	Lachnospiraceae	NA	NA							0.67832	0.885125
ASV_1578	Bacteria	Firmicutes	Clostridia	Clostridiales	Lachnospiraceae	Lachnospiraceae_NK4A136_group	NA							0.201809	0.605574
ASV_1579	Bacteria	Firmicutes	Clostridia	Clostridiales	Lachnospiraceae	NA	NA							0.524462	0.808555
ASV_1580	Bacteria	Firmicutes	Erysipelotrichia	Erysipelotrichales	Erysipelotrichaceae	NA	NA							0.922813	0.970803
ASV_1581	Bacteria	Firmicutes	Clostridia	Clostridiales	Lachnospiraceae	Tyzzerella	NA							0.590745	0.851059
ASV_1582	Bacteria	Firmicutes	Clostridia	Clostridiales	Ruminococcaceae	Ruminiclostridium_9	NA
ASV_1583	Bacteria	Firmicutes	Clostridia	Clostridiales	Ruminococcaceae	NA	NA
ASV_1584	Bacteria	Firmicutes	Bacilli	Lactobacillales	Streptococcaceae	Streptococcus	NA
ASV_1585	Bacteria	Firmicutes	Clostridia	Clostridiales	Ruminococcaceae	Ruminococcaceae_UCG-009	NA					0.650106	0.796237
ASV_1586	Bacteria	Firmicutes	Clostridia	Clostridiales	Lachnospiraceae	NA	NA			0.19663	0.559555
ASV_1587	Bacteria	Firmicutes	Clostridia	Clostridiales	Lachnospiraceae	GCA-900066575	NA
ASV_1588	Bacteria	Firmicutes	Clostridia	Clostridiales	Ruminococcaceae	Ruminiclostridium_9	NA
ASV_1589	Bacteria	Firmicutes	Clostridia	Clostridiales	Lachnospiraceae	NA	NA
ASV_1590	Bacteria	Firmicutes	Clostridia	Clostridiales	Lachnospiraceae	Tyzzerella	NA									0.167399	0.536282
ASV_1591	Bacteria	Firmicutes	Clostridia	Clostridiales	Lachnospiraceae	NA	NA									0.190828	0.564071
ASV_1592	Bacteria	Firmicutes	Clostridia	Clostridiales	Lachnospiraceae	NA	NA									0.0671249	0.489745
ASV_1593	Bacteria	Firmicutes	Clostridia	Clostridiales	Lachnospiraceae	GCA-900066575	NA							0.00824825	0.239334
ASV_1594	Bacteria	Firmicutes	Clostridia	Clostridiales	Ruminococcaceae	Ruminiclostridium_6	NA							0.080475	0.42468
ASV_1595	Bacteria	Actinobacteria	Coriobacteriia	Coriobacteriales	Eggerthellaceae	Adlercreutzia	NA							0.616918	0.866896
ASV_1596	Bacteria	Firmicutes	Clostridia	Clostridiales	Ruminococcaceae	Ruminococcaceae_UCG-014	NA							0.206021	0.605574
ASV_1597	Bacteria	Firmicutes	Clostridia	Clostridiales	Lachnospiraceae	Lachnospiraceae_NK4A136_group	NA			0.914742	0.991211
ASV_1598	Bacteria	Firmicutes	Clostridia	Clostridiales	Lachnospiraceae	Roseburia	NA			0.0740471	0.459184
ASV_1599	Bacteria	Firmicutes	Bacilli	Lactobacillales	Aerococcaceae	Aerococcus	NA
ASV_1600	Bacteria	Firmicutes	Clostridia	Clostridiales	Lachnospiraceae	NA	NA							0.0390397	0.342131
ASV_1601	Bacteria	Firmicutes	Clostridia	Clostridiales	Lachnospiraceae	NA	NA							0.2052	0.605574
ASV_1602	Bacteria	Firmicutes	Clostridia	Clostridiales	Ruminococcaceae	Ruminococcaceae_UCG-014	NA							0.376044	0.729469
ASV_1603	Bacteria	Firmicutes	Bacilli	Lactobacillales	Aerococcaceae	Aerococcus	NA					0.494834	0.773839
ASV_1604	Bacteria	Firmicutes	Clostridia	Clostridiales	Ruminococcaceae	Ruminococcaceae_UCG-014	NA			0.930126	0.991211
ASV_1605	Bacteria	Firmicutes	Clostridia	Clostridiales	Lachnospiraceae	Lachnoclostridium	NA			0.868339	0.975229
ASV_1606	Bacteria	Firmicutes	Clostridia	Clostridiales	Lachnospiraceae	NA	NA					0.574336	0.773839
ASV_1607	Bacteria	Deinococcus-Thermus	Deinococci	Deinococcales	Deinococcaceae	Deinococcus	NA
ASV_1608	Bacteria	Firmicutes	Clostridia	Clostridiales	Lachnospiraceae	NA	NA
ASV_1609	Bacteria	Bacteroidetes	Bacteroidia	Bacteroidales	NA	NA	NA					0.691541	0.809813
ASV_1610	Bacteria	Firmicutes	Clostridia	Clostridiales	Lachnospiraceae	A2	NA
ASV_1611	Bacteria	Firmicutes	Clostridia	Clostridiales	Lachnospiraceae	NA	NA
ASV_1612	Bacteria	Firmicutes	Clostridia	Clostridiales	Clostridiales_vadinBB60_group	NA	NA									0.290611	0.629932
ASV_1613	Bacteria	Firmicutes	Clostridia	Clostridiales	Lachnospiraceae	NA	NA									0.366111	0.721116
ASV_1614	Bacteria	Bacteroidetes	Bacteroidia	Bacteroidales	Marinifilaceae	Odoribacter	NA					0.468864	0.773839
ASV_1615	Bacteria	Proteobacteria	Deltaproteobacteria	Desulfovibrionales	Desulfovibrionaceae	Bilophila	NA
ASV_1616	Bacteria	Bacteroidetes	Bacteroidia	Bacteroidales	Muribaculaceae	NA	NA
ASV_1617	Bacteria	Firmicutes	Clostridia	Clostridiales	Lachnospiraceae	Lachnospiraceae_NK4A136_group	NA	0.85559	0.915414
ASV_1618	Bacteria	Firmicutes	Clostridia	Clostridiales	Lachnospiraceae	NA	NA			0.963739	0.991211
ASV_1619	Bacteria	Firmicutes	Clostridia	Clostridiales	Ruminococcaceae	Ruminiclostridium_9	NA
ASV_1620	Bacteria	Tenericutes	Mollicutes	Mollicutes_RF39	NA	NA	NA
ASV_1621	Bacteria	Firmicutes	Clostridia	Clostridiales	Ruminococcaceae	Ruminiclostridium_9	NA									0.0817758	0.517595
ASV_1622	Bacteria	Firmicutes	Clostridia	Clostridiales	Lachnospiraceae	Lachnospiraceae_NK4A136_group	NA									0.0532033	0.489745
ASV_1623	Bacteria	Firmicutes	Clostridia	Clostridiales	Ruminococcaceae	Ruminococcaceae_UCG-009	NA							0.0528621	0.37742
ASV_1624	Bacteria	Tenericutes	Mollicutes	Mollicutes_RF39	NA	NA	NA							0.524462	0.808555
ASV_1625	Bacteria	Firmicutes	Clostridia	Clostridiales	Ruminococcaceae	Oscillibacter	NA
ASV_1626	Bacteria	Firmicutes	Clostridia	Clostridiales	Christensenellaceae	NA	NA					0.636972	0.78823
ASV_1627	Bacteria	Proteobacteria	Alphaproteobacteria	Rhizobiales	Hyphomicrobiaceae	Hyphomicrobium	denitrificans
ASV_1628	Bacteria	Firmicutes	Clostridia	Clostridiales	Lachnospiraceae	NA	NA			0.362753	0.727044
ASV_1629	Bacteria	Firmicutes	Clostridia	Clostridiales	Christensenellaceae	NA	NA							0.866564	0.952981
ASV_1630	Bacteria	Firmicutes	Clostridia	Clostridiales	Ruminococcaceae	Ruminococcaceae_UCG-014	NA							0.16387	0.554418
ASV_1631	Bacteria	Firmicutes	Clostridia	Clostridiales	Lachnospiraceae	Lachnospiraceae_NK4A136_group	NA							0.108628	0.482001
ASV_1632	Bacteria	Bacteroidetes	Bacteroidia	Bacteroidales	Muribaculaceae	NA	NA
ASV_1633	Bacteria	Bacteroidetes	Bacteroidia	Bacteroidales	Rikenellaceae	Alistipes	NA
ASV_1634	Bacteria	Firmicutes	Clostridia	Clostridiales	Ruminococcaceae	Harryflintia	NA
ASV_1635	Bacteria	Firmicutes	Bacilli	Lactobacillales	Enterococcaceae	Enterococcus	NA
ASV_1636	Bacteria	Bacteroidetes	Bacteroidia	Bacteroidales	Muribaculaceae	Muribaculum	NA
ASV_1637	Bacteria	Firmicutes	Clostridia	Clostridiales	Ruminococcaceae	NA	NA							0.211089	0.607119
ASV_1638	Bacteria	Firmicutes	Clostridia	Clostridiales	Lachnospiraceae	NA	NA
ASV_1639	Bacteria	Firmicutes	Clostridia	Clostridiales	Lachnospiraceae	Lachnospiraceae_NK4A136_group	NA
ASV_1640	Bacteria	Firmicutes	Clostridia	Clostridiales	Ruminococcaceae	Ruminococcaceae_UCG-014	NA					0.496749	0.773839
ASV_1641	Bacteria	Firmicutes	Clostridia	Clostridiales	Lachnospiraceae	NA	NA
ASV_1642	Bacteria	Proteobacteria	Gammaproteobacteria	Betaproteobacteriales	Burkholderiaceae	Pelomonas	NA			0.346635	0.706718
ASV_1643	Bacteria	Firmicutes	Clostridia	Clostridiales	Family_XIII	Family_XIII_UCG-001	NA
ASV_1644	Bacteria	Firmicutes	Clostridia	Clostridiales	Lachnospiraceae	NA	NA							0.206021	0.605574
